# Supplementary material for: Palladium-catalyzed C-7 alkenylation of indolines using molecular oxygen as the sole oxidant
Source: Royal Society of Chemistry journal article supplement (doi:10.1039/c5ra02245b), 2015-01-01
Supplement: c5ra02245b1.pdf [file c5ra02245b1.pdf]

## Supporting Information

### **Palladium-Catalyzed C-7 Alkenylation of Indolines Using Molecular Oxygen as the Sole Oxidant**

Dong Yang, Shuai Mao, Ya-Ru Gao, Dong-Dong Guo, Shi-huan Guo, Bin Li,  
Yong-Qiang Wang\*

*Key Laboratory of Synthetic and Natural Functional Molecule Chemistry of Ministry  
of Education, Department of Chemistry & Materials Science, Northwest University,  
Xi'an 710069, P. R. China  
E-mail: [wangyq@nwu.edu.cn](mailto:wangyq@nwu.edu.cn)*

|                                                               |         |
|---------------------------------------------------------------|---------|
| 1: Copies of $^1\text{H}$ NMR and $^{13}\text{C}$ NMR spectra | S2—S47  |
| 2: X-Ray structure of <b>3da</b> and <b>3dk</b>               | S48—S56 |

# 1: Copies of 1H NMR and 13C NMR spectra

## 3-Methylindoline

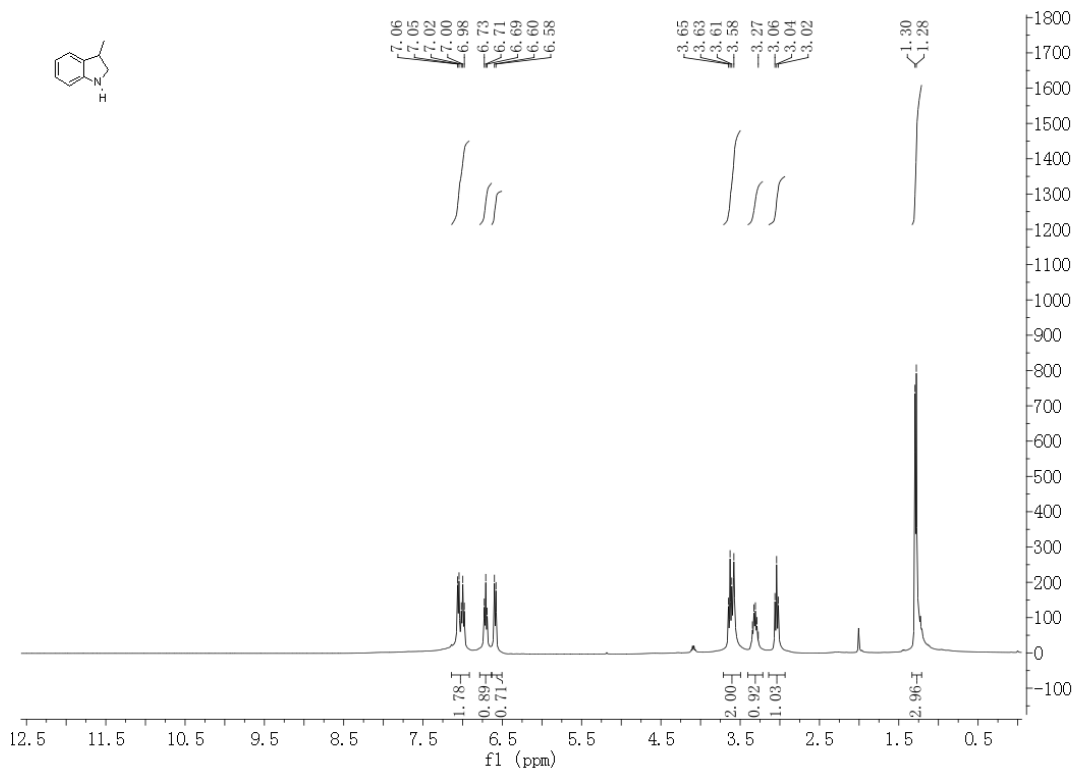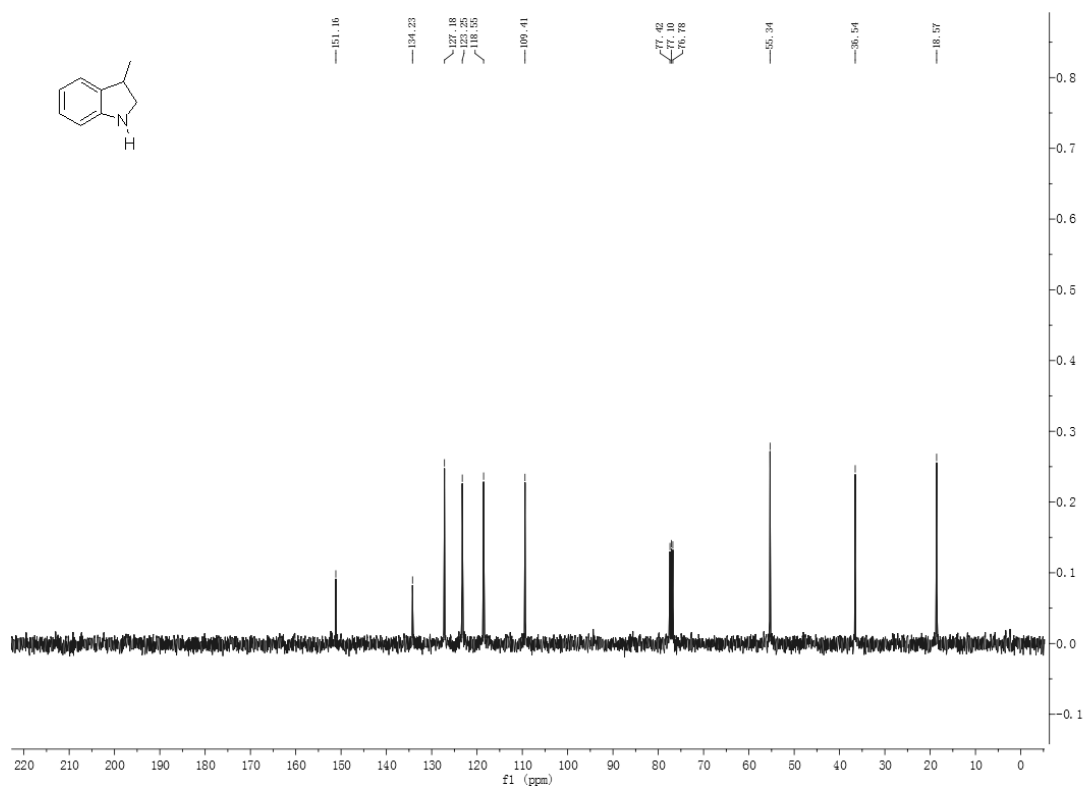

# 5-Methylindoline

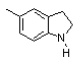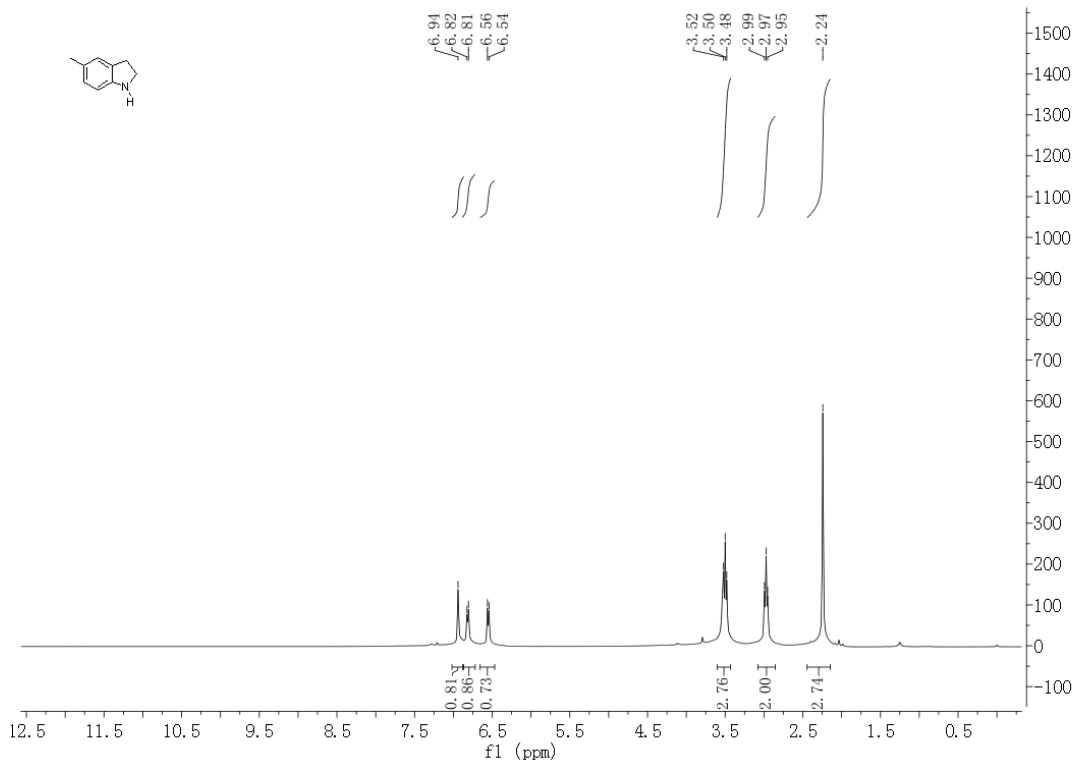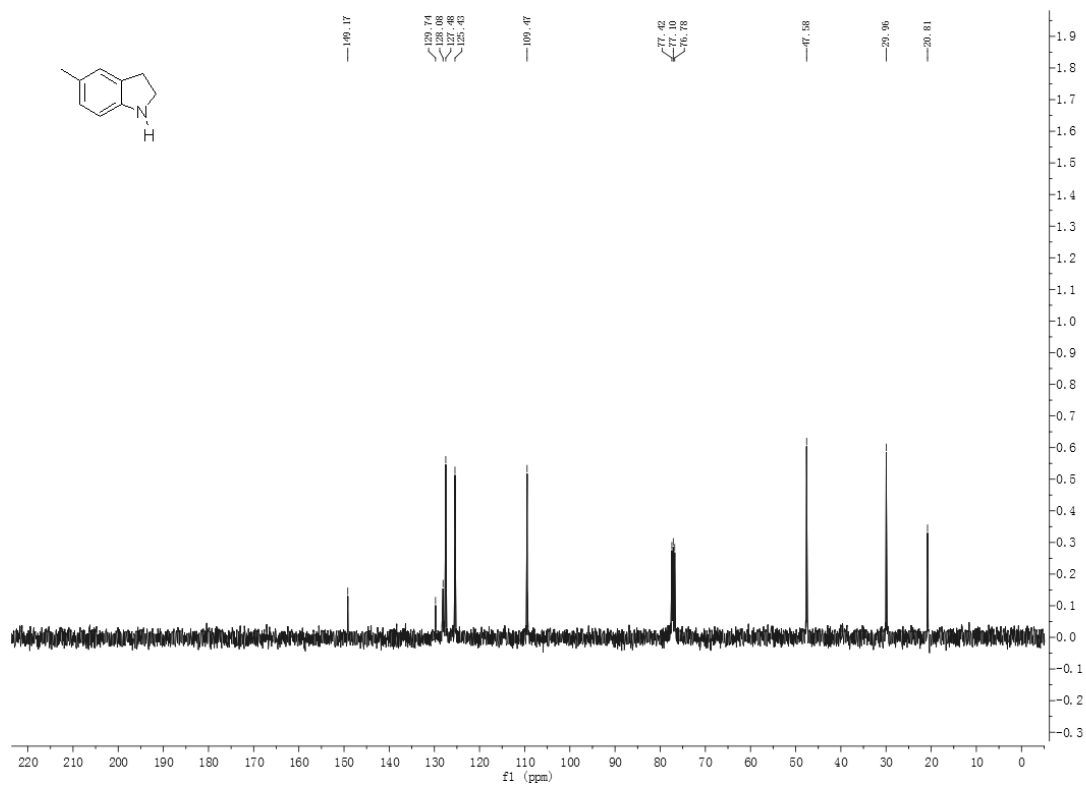

# 5-Methoxyindoline

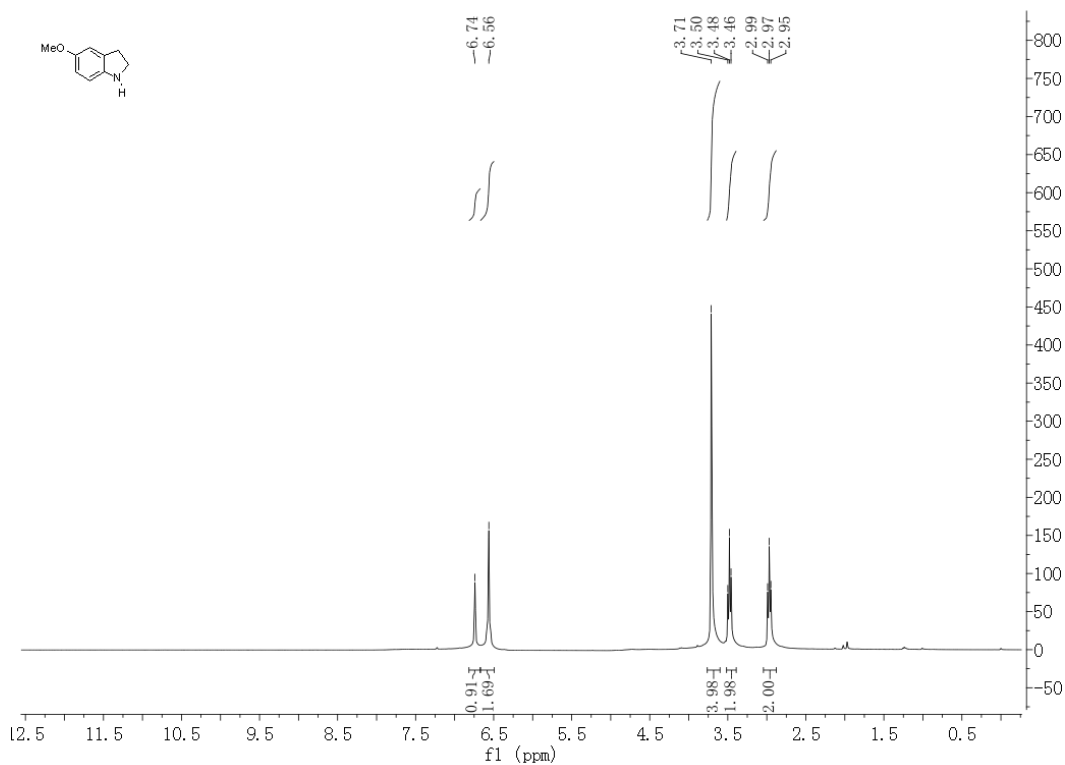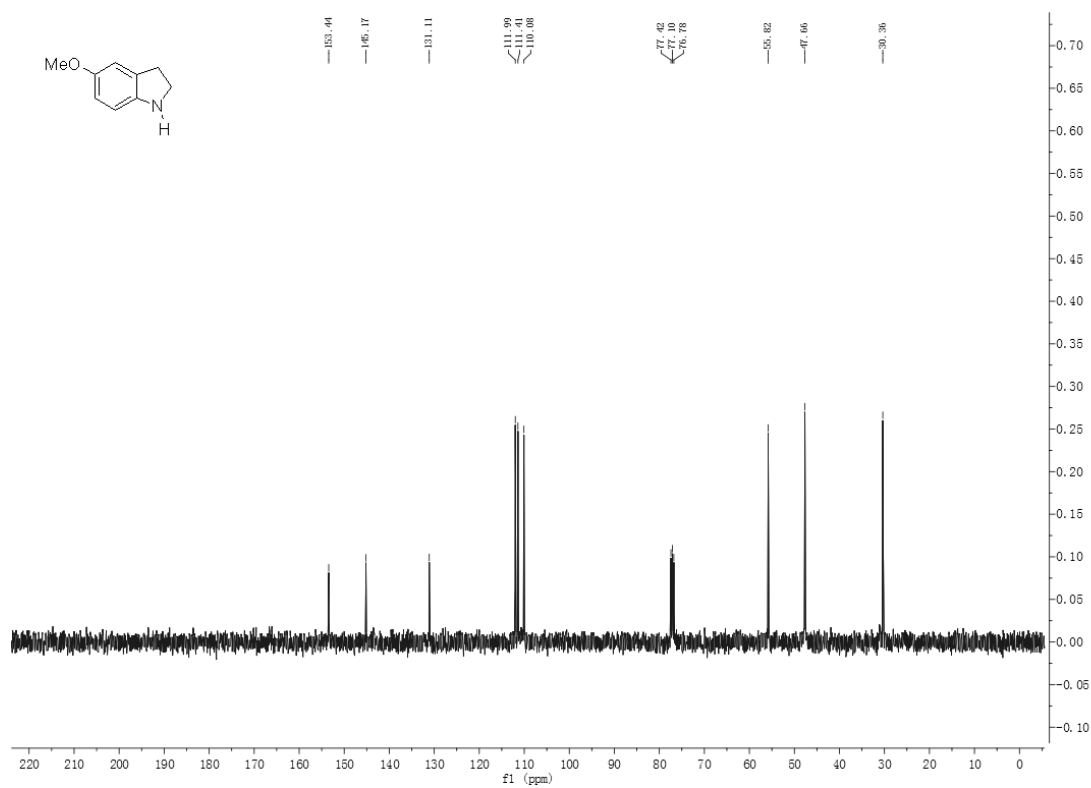

# 5-Chloroindoline

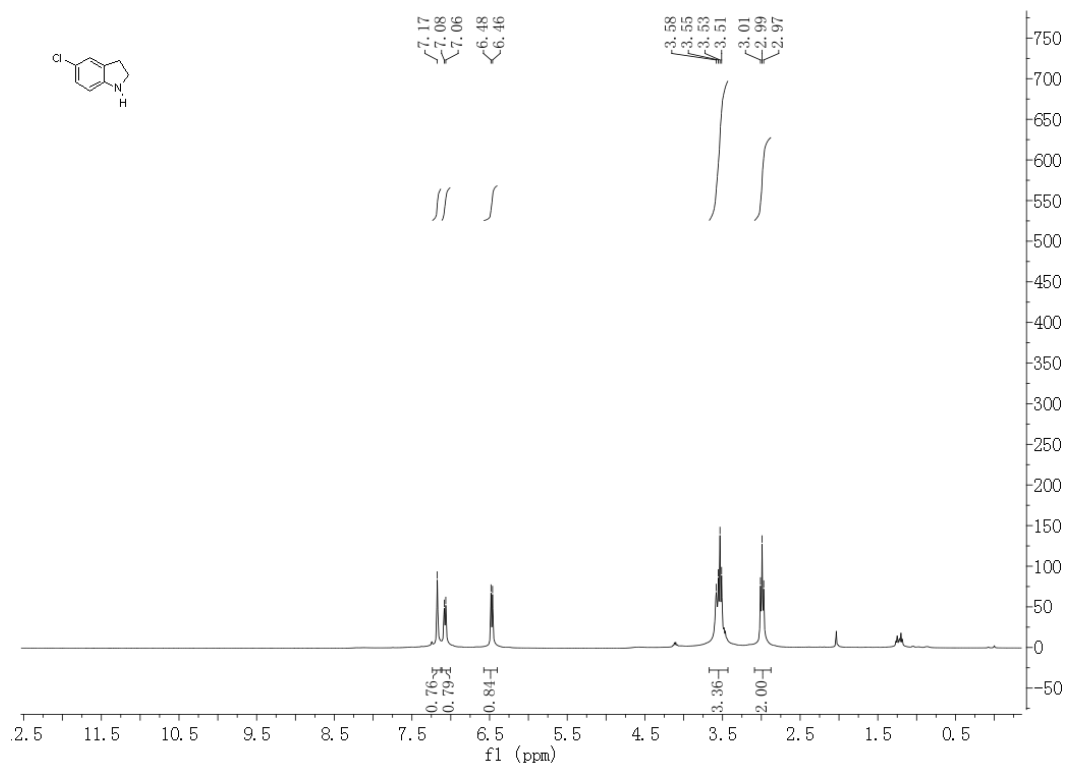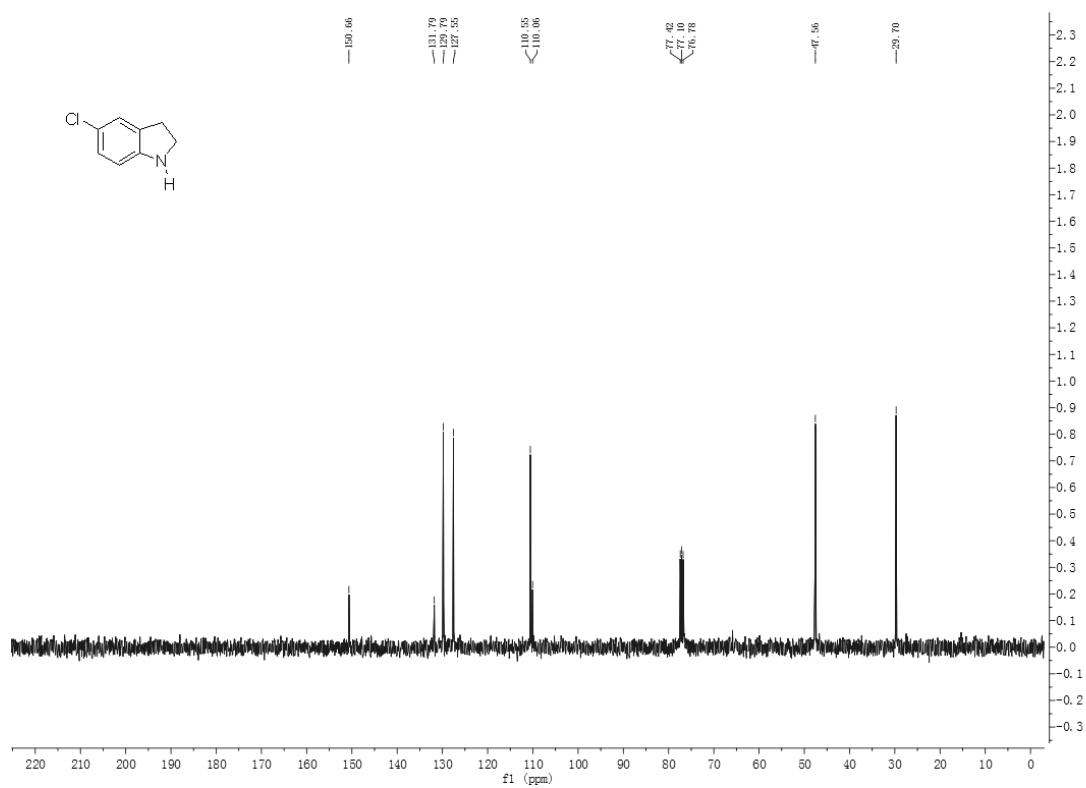

# 5-Bromoindoline

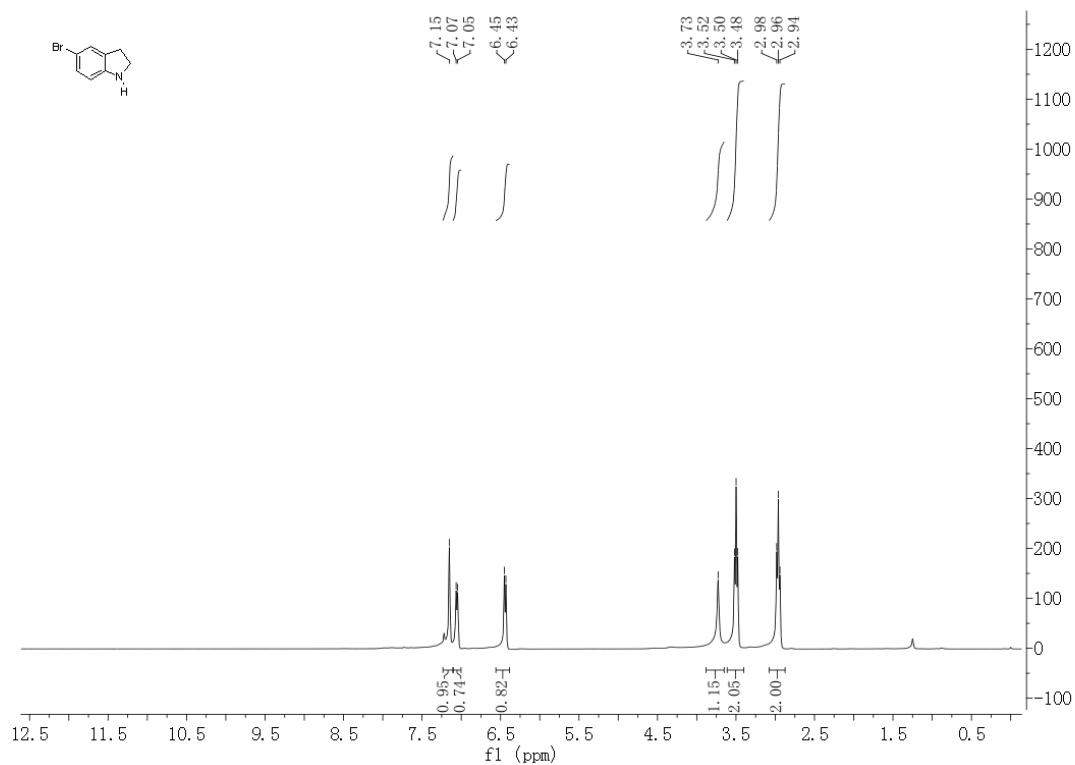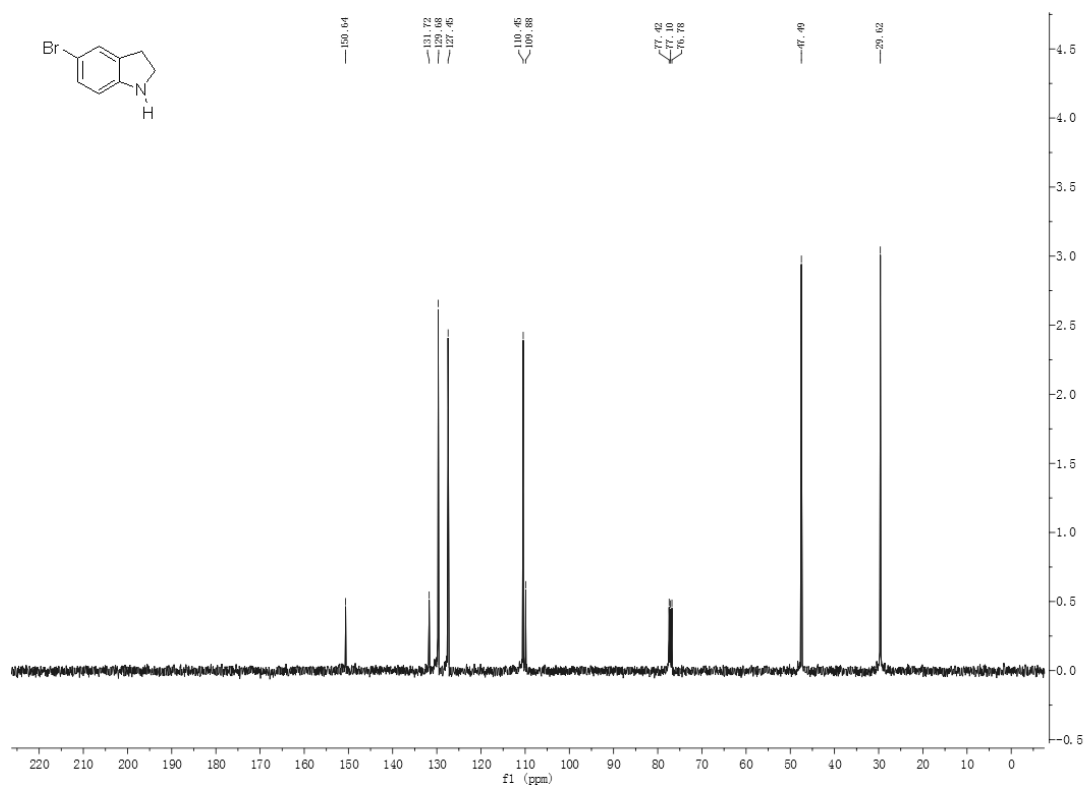

# 1-Tosylindoline (1a)

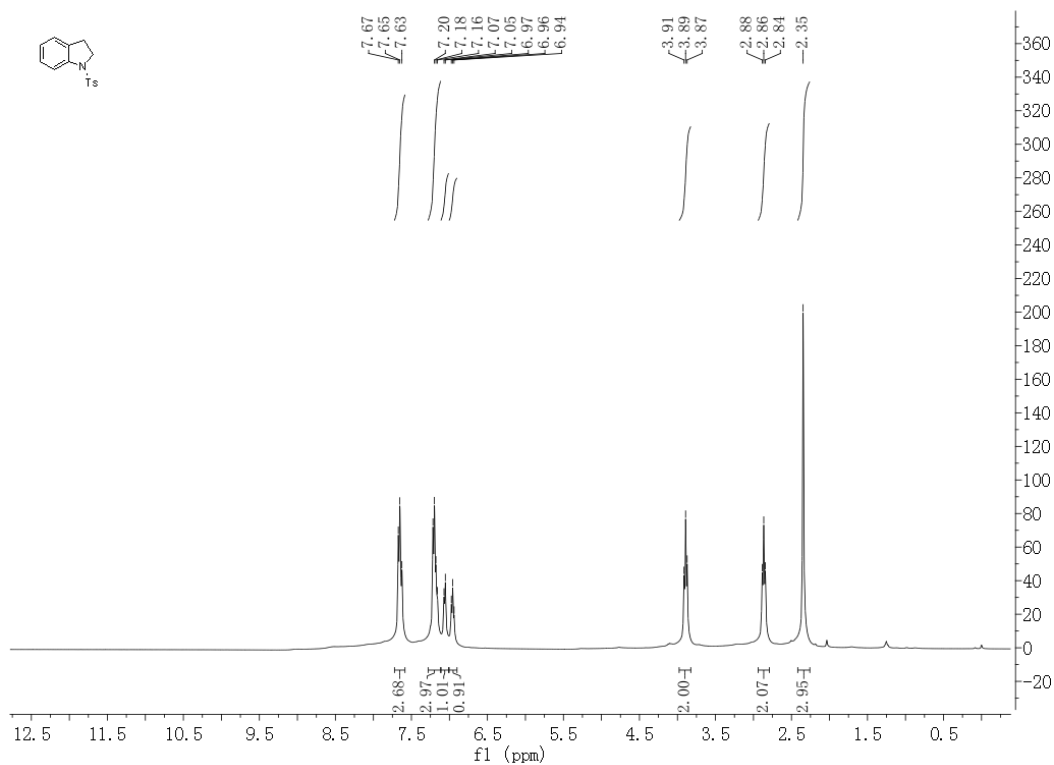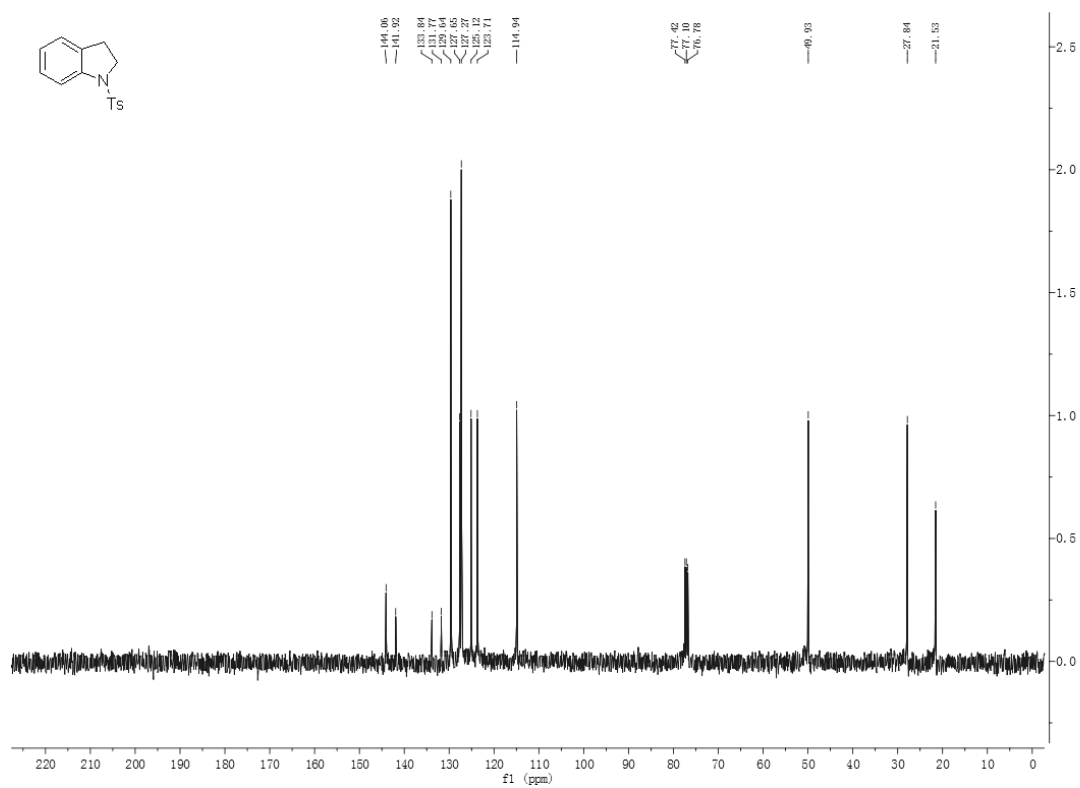

# 1-(Indolin-1-yl)ethanone (1b)

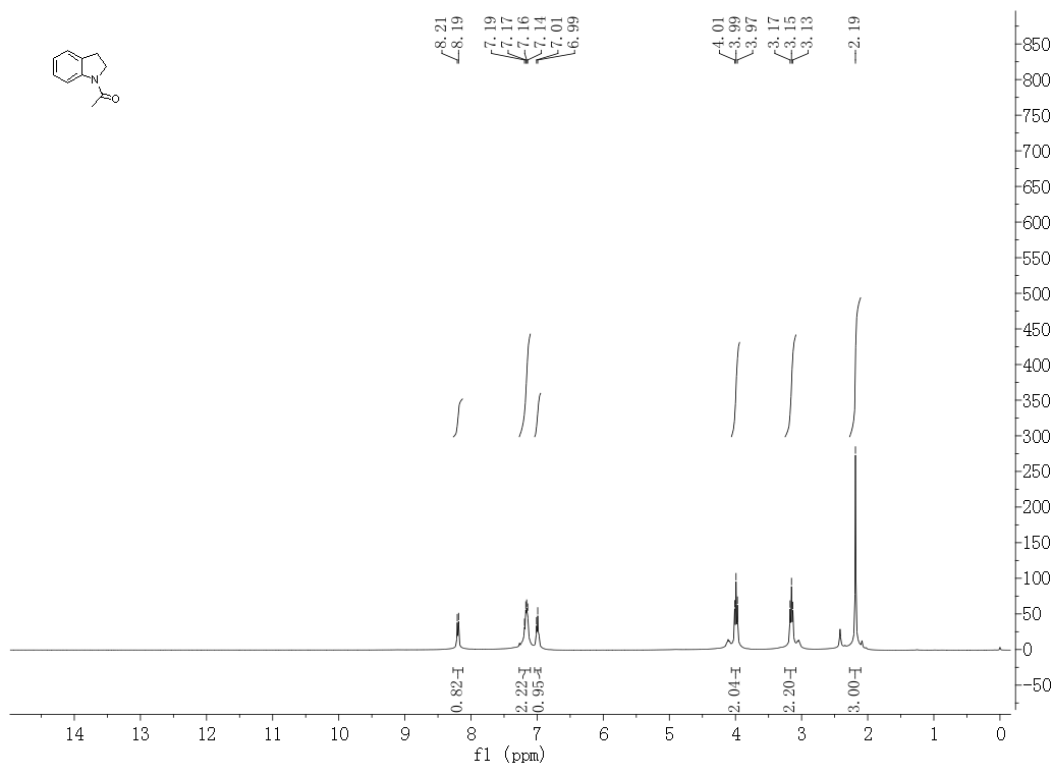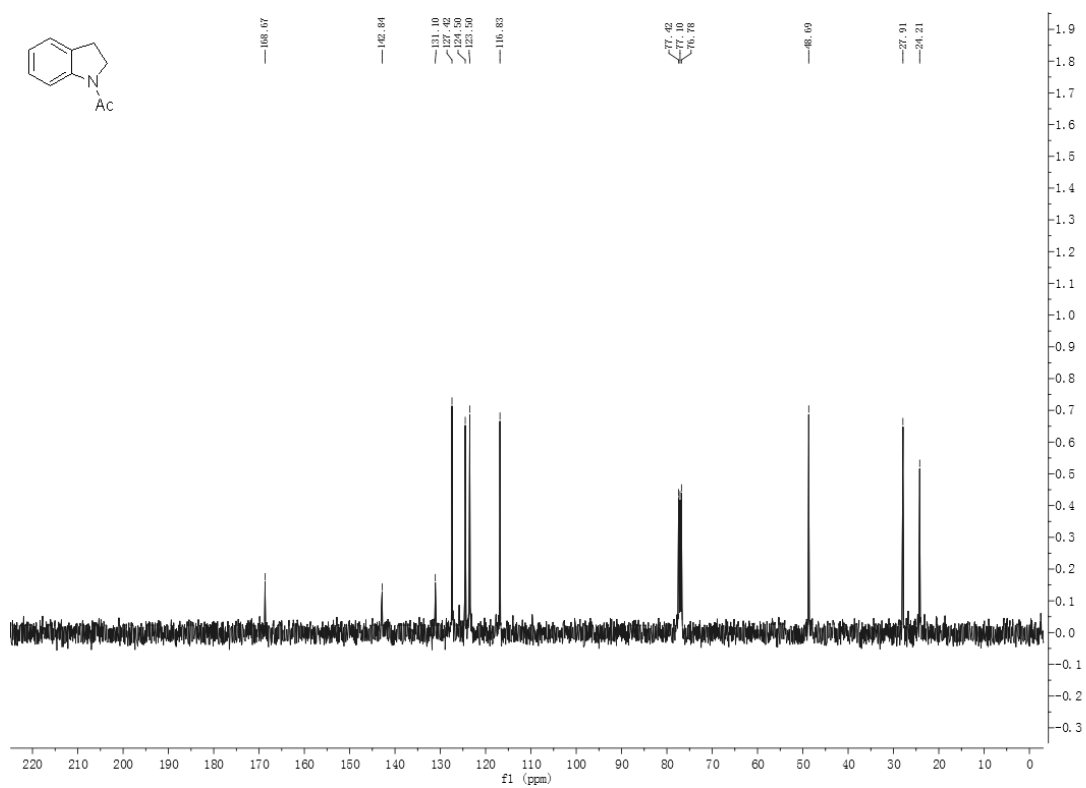



# N-(2-Pyridyl) carbonyl indoline (1c)

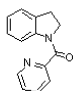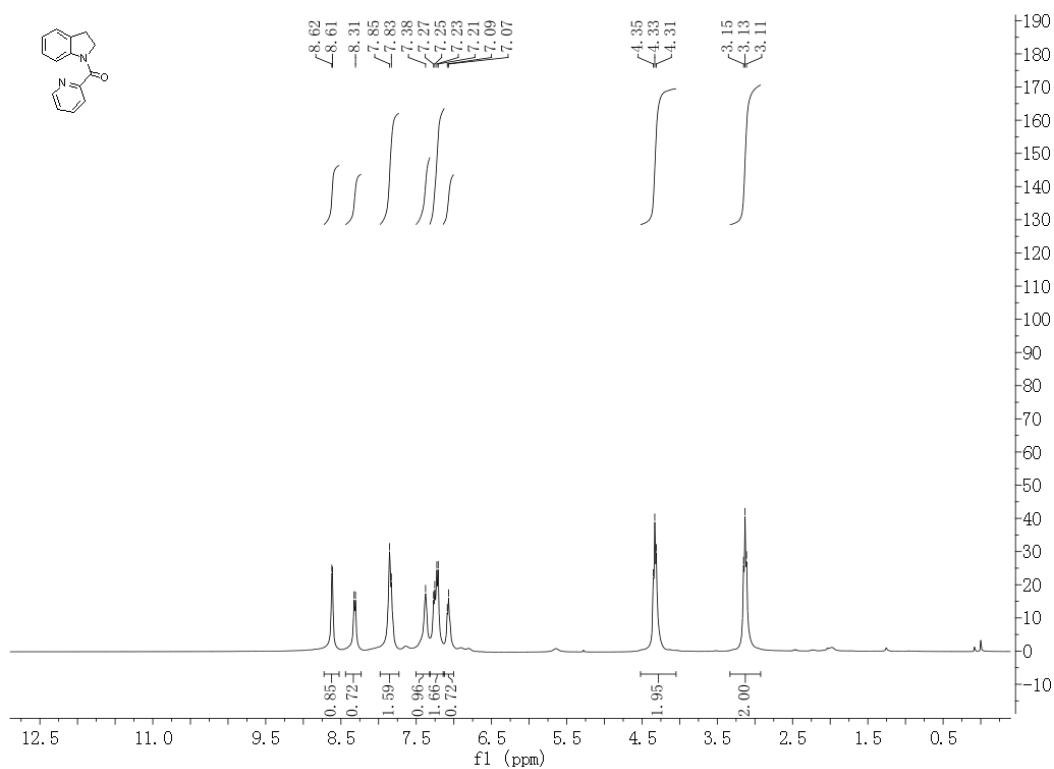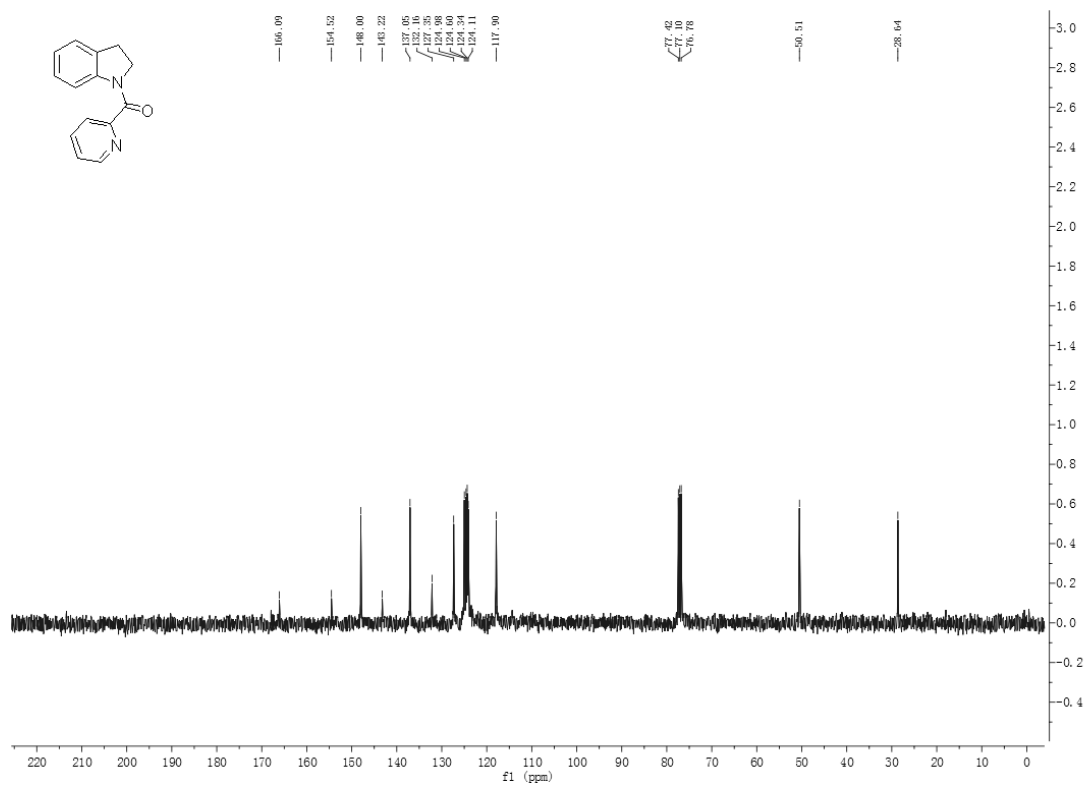

# *N*-(2-Pyridyl)sulfonylindoline (1d)

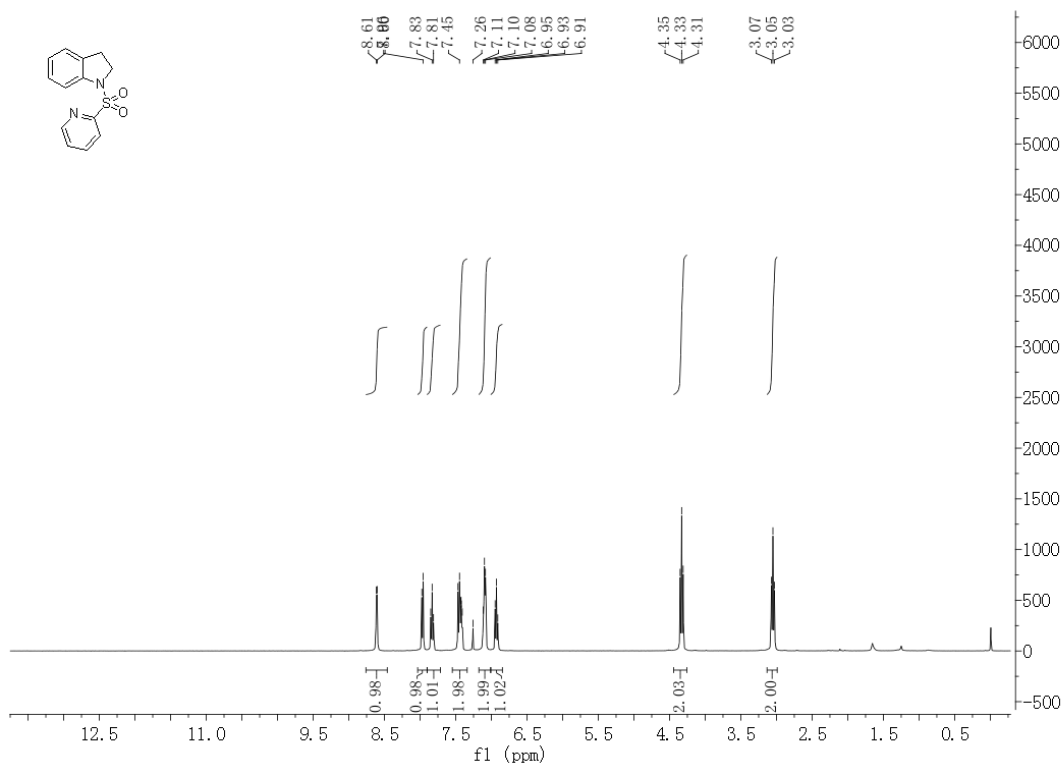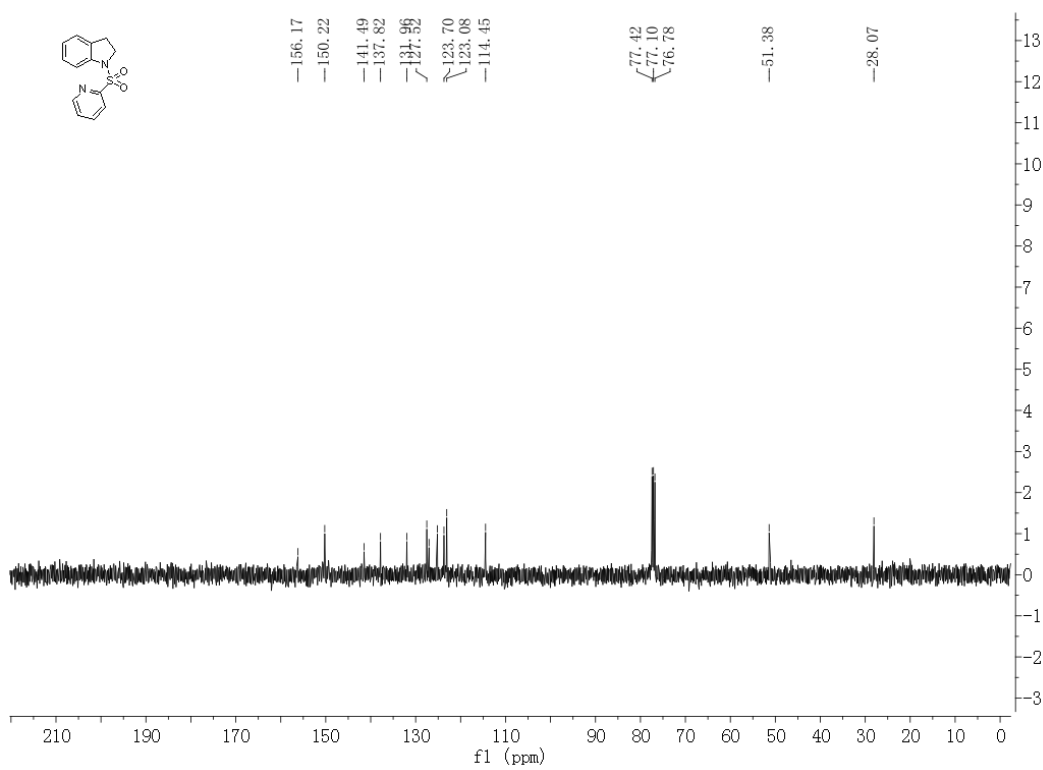

## 2-Methyl-1-(pyridin-2-ylsulfonyl)indoline (1e)

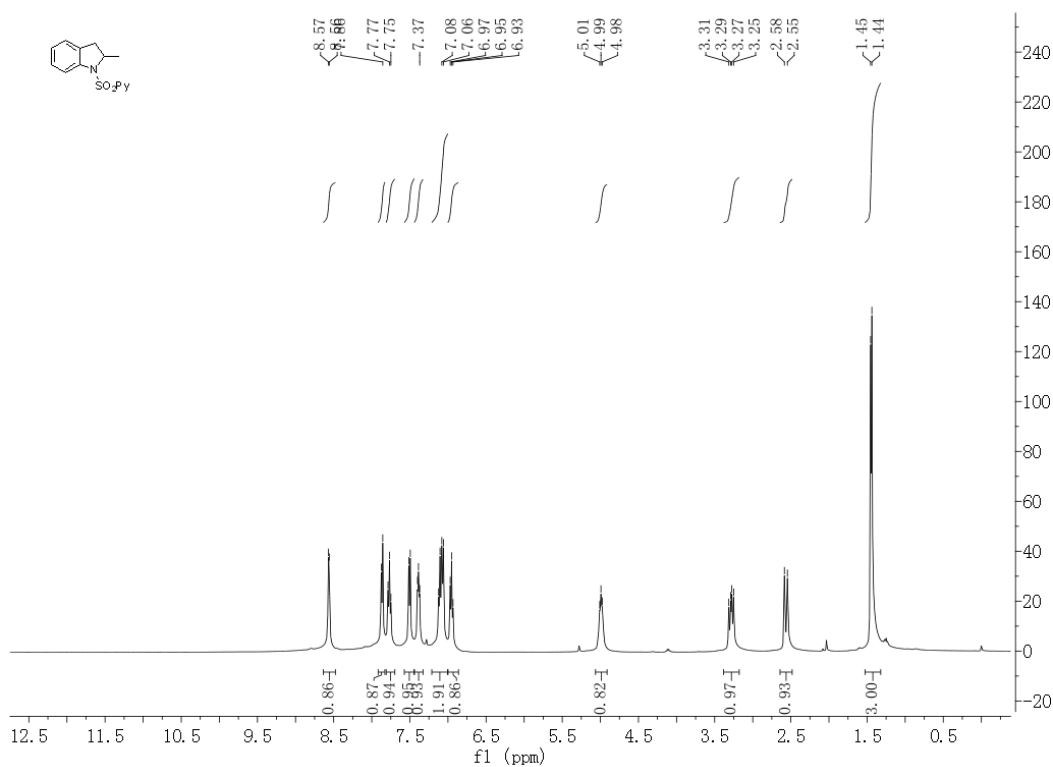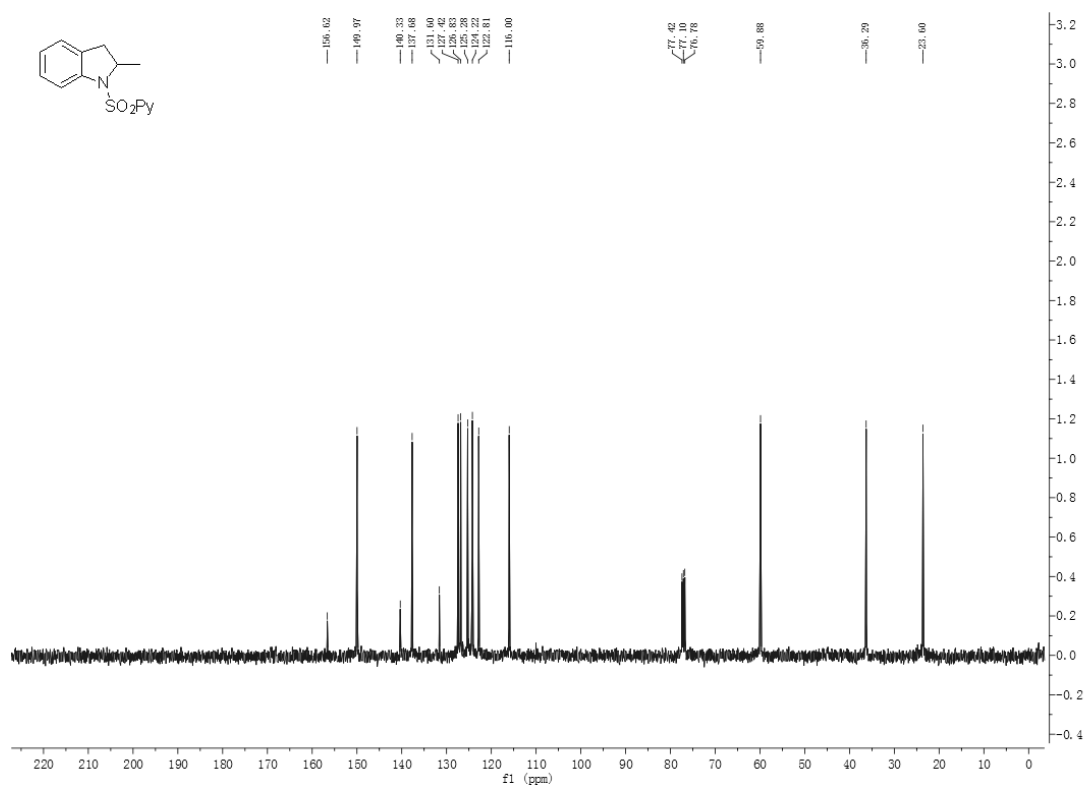

### 3-Methyl-1-(pyridin-2-ylsulfonyl)indoline (1f)

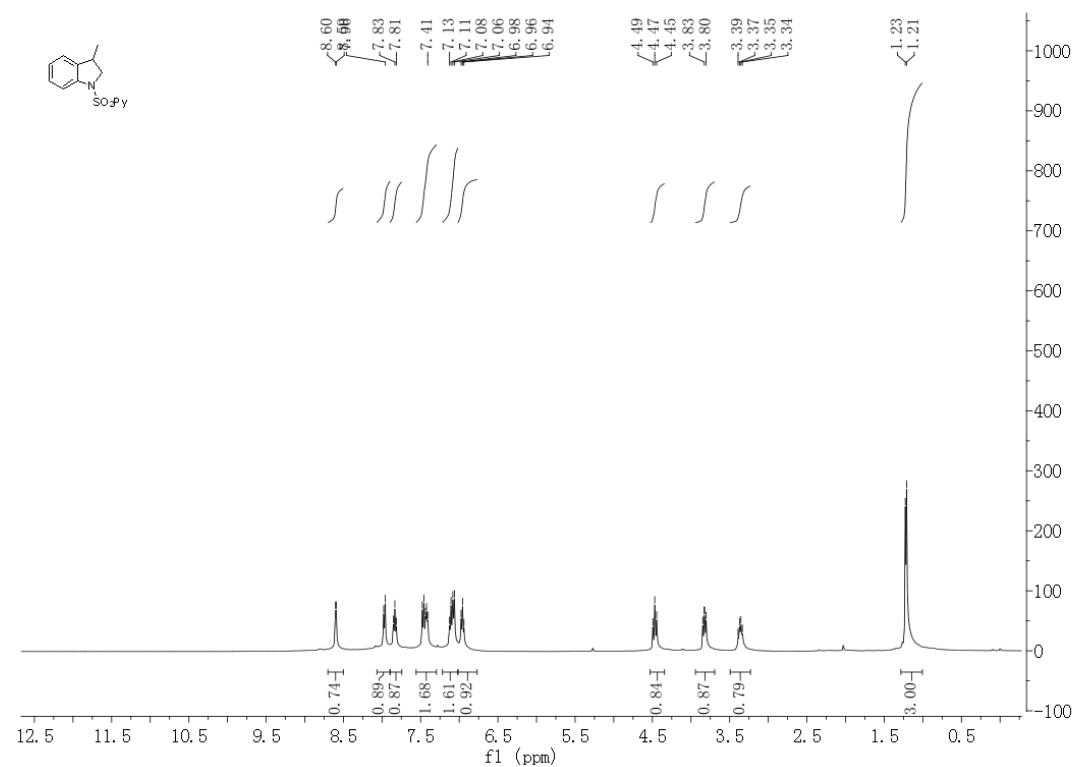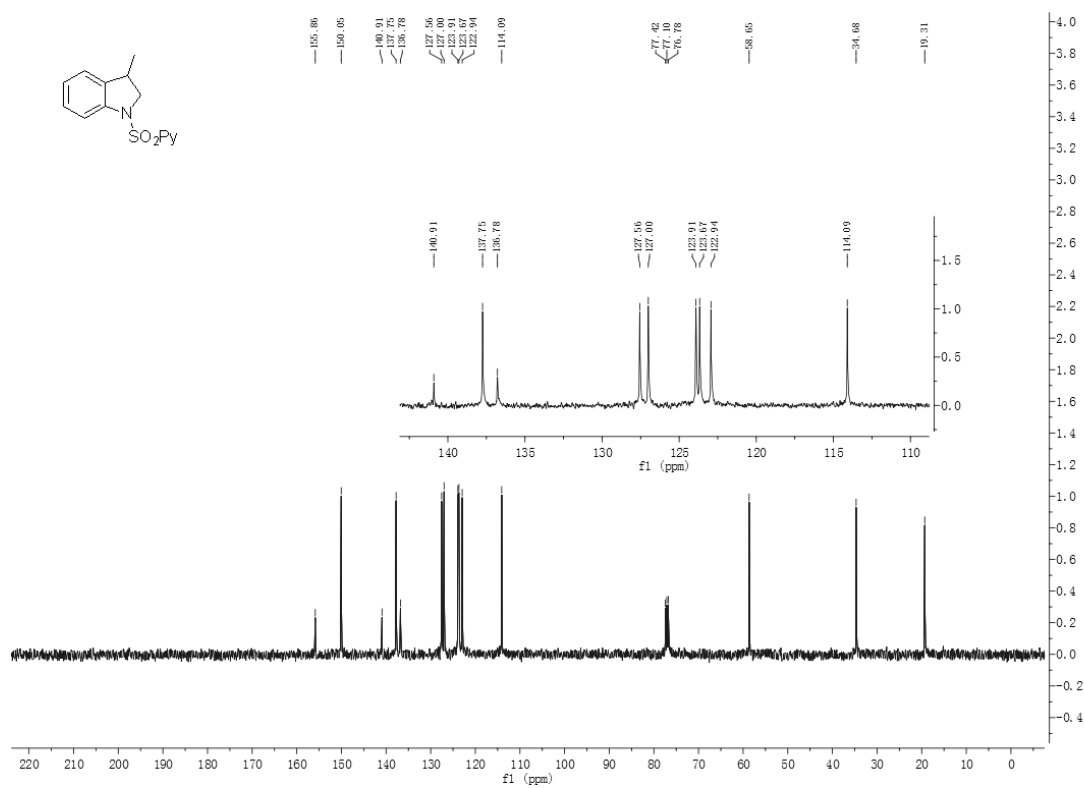

### 5-Methyl-1-(pyridin-2-ylsulfonyl)indoline (1g)

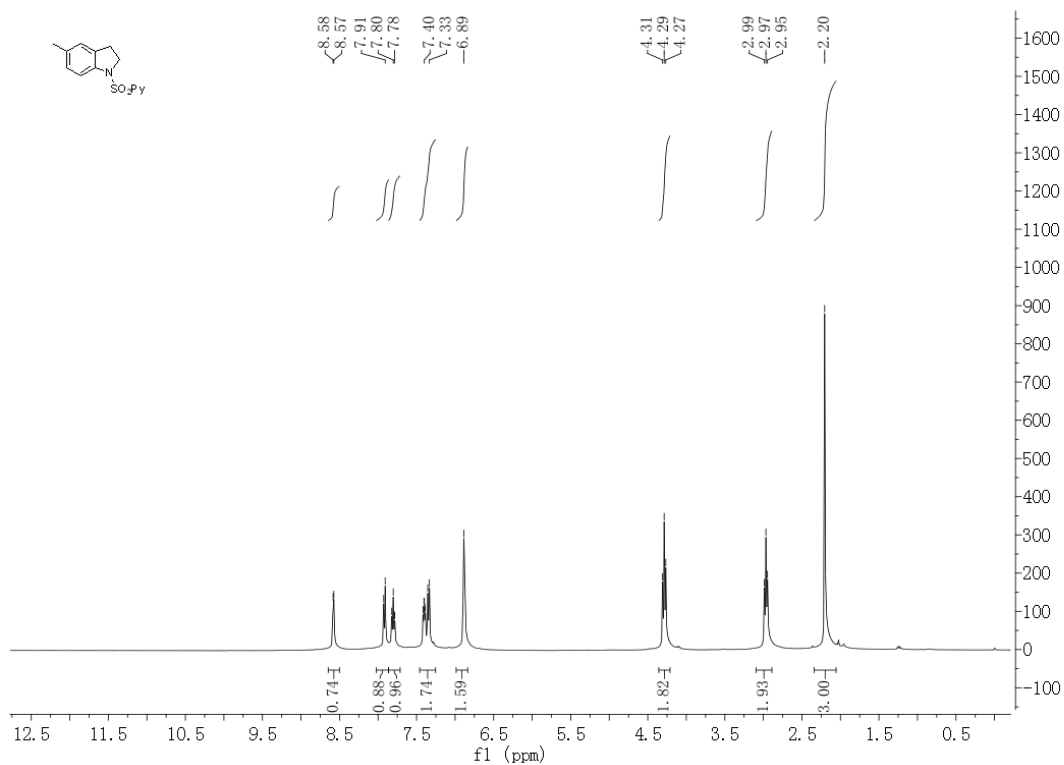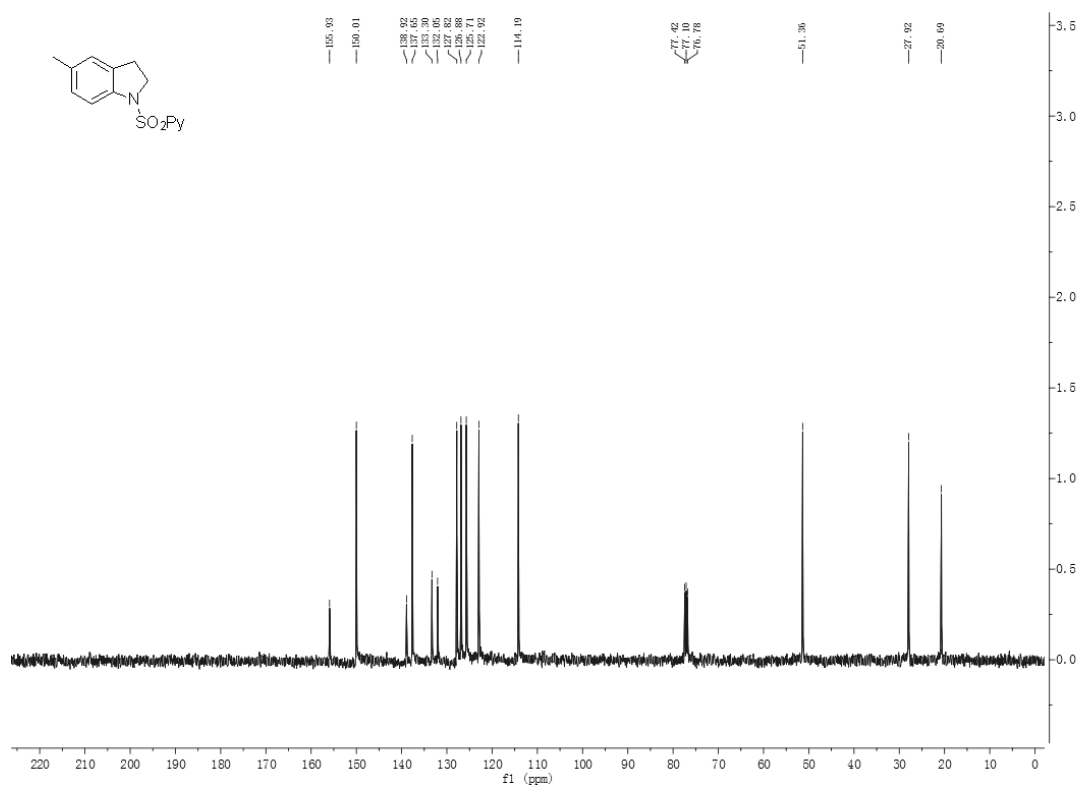

### 5-Methoxy-1-(pyridin-2-ylsulfonyl)indoline (1h)

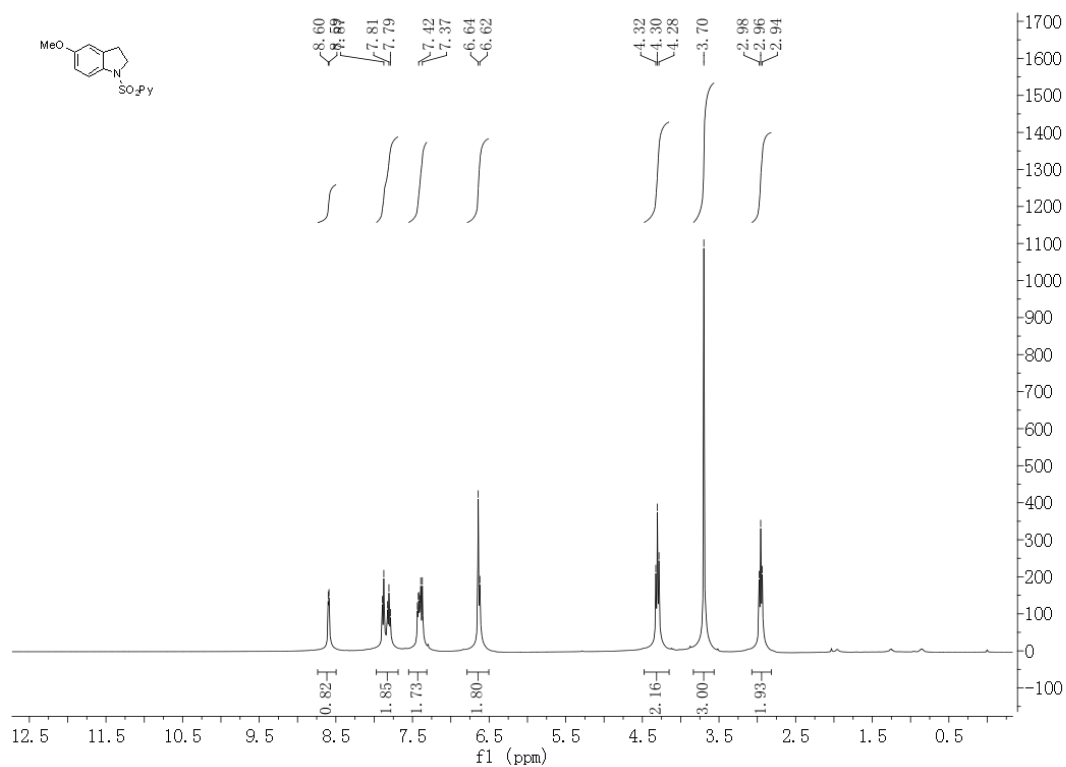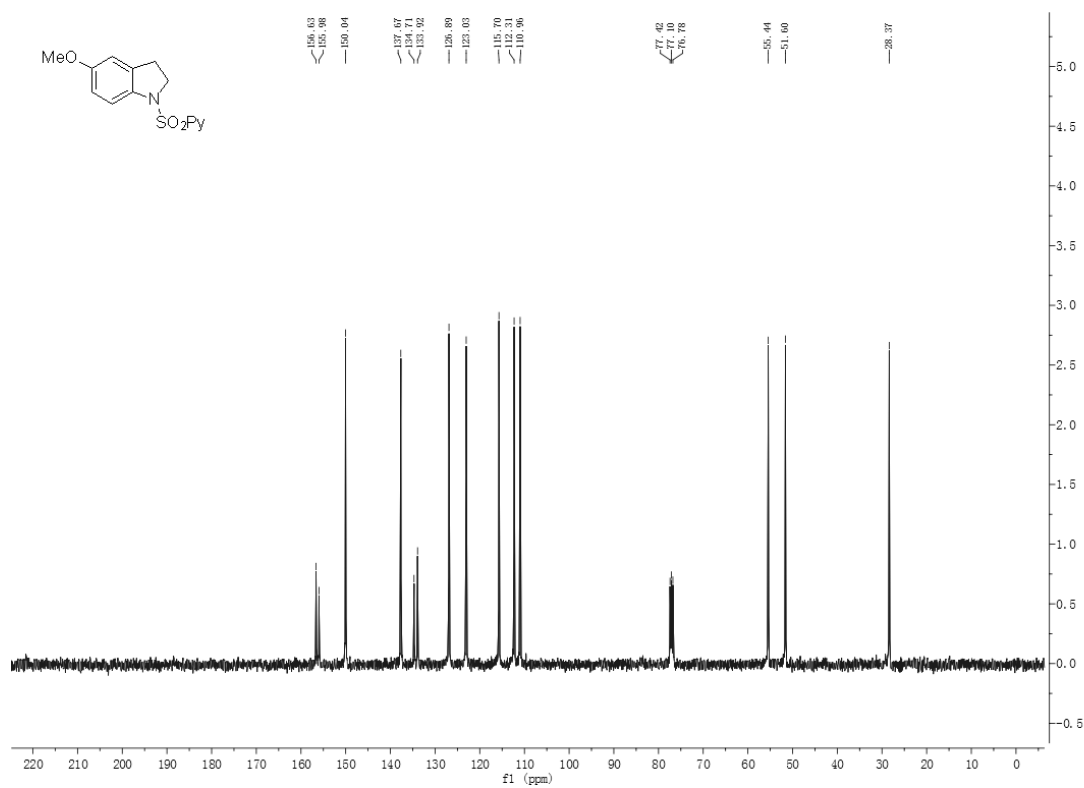

# 5-Chloro-1-(pyridin-2-ylsulfonyl)indoline

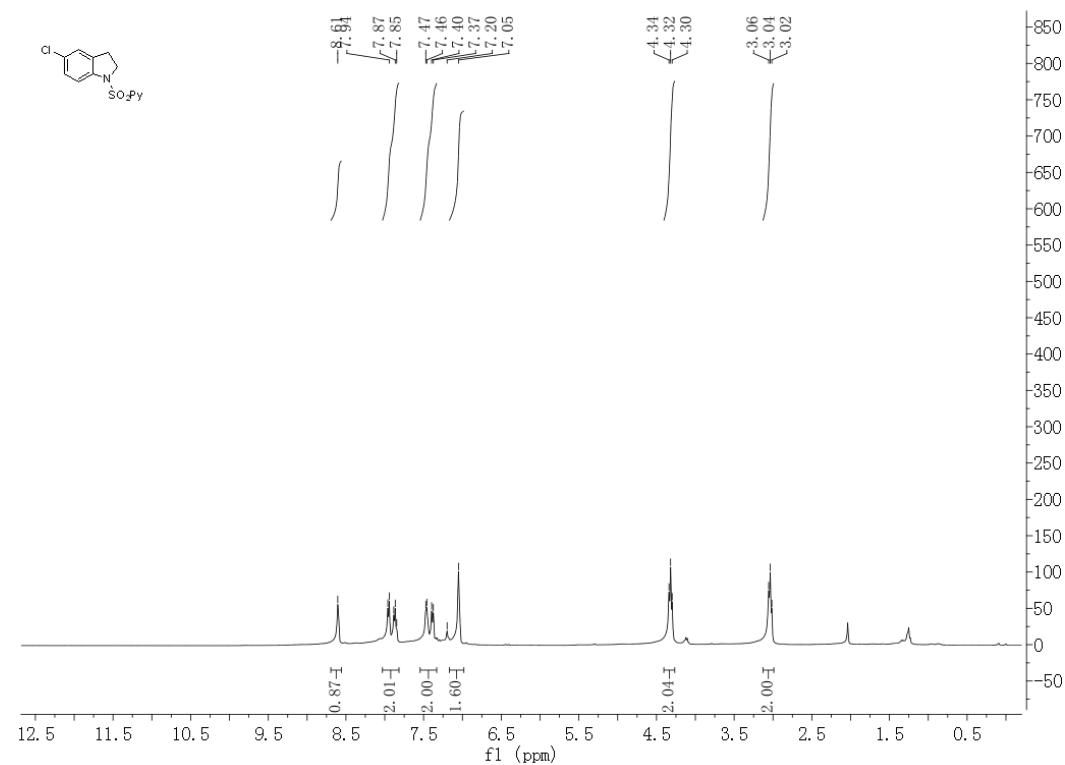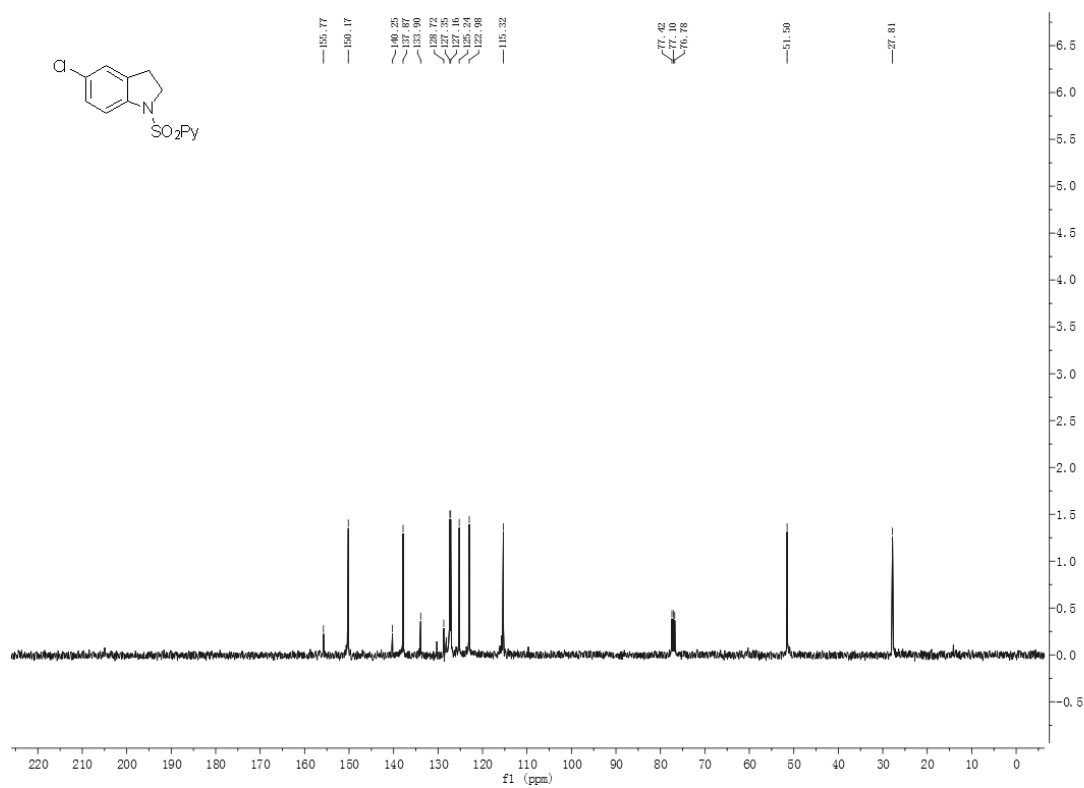

# 5-Bromo-1-(pyridin-2-ylsulfonyl)indoline

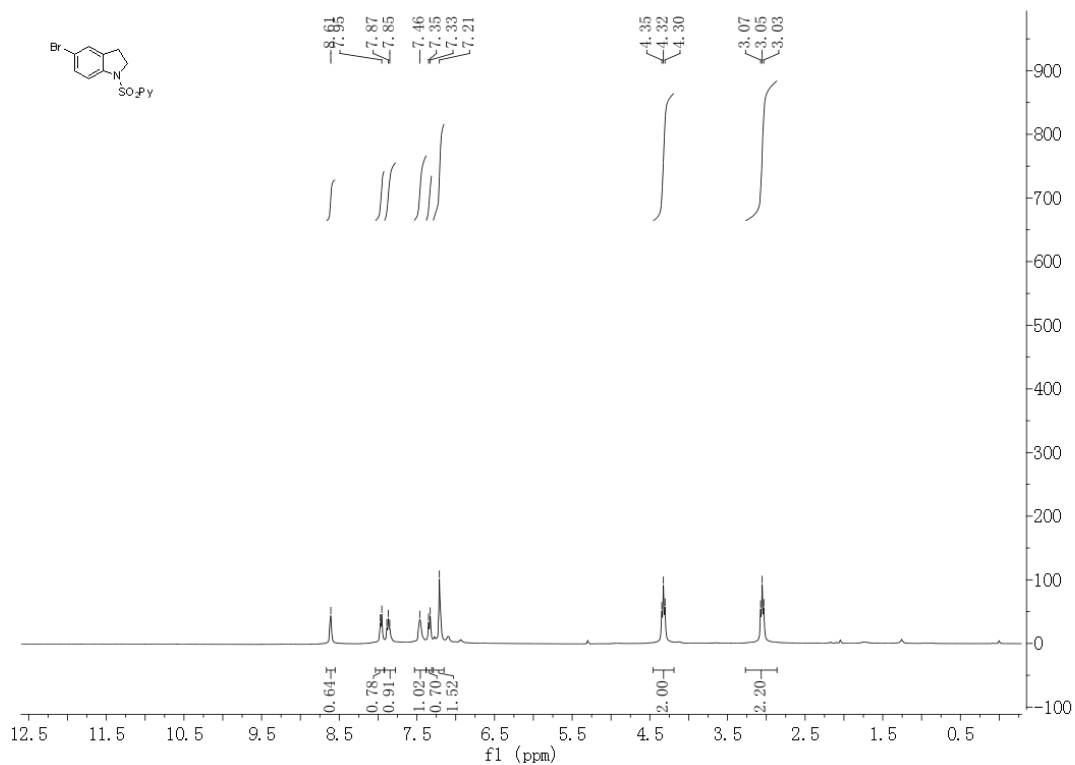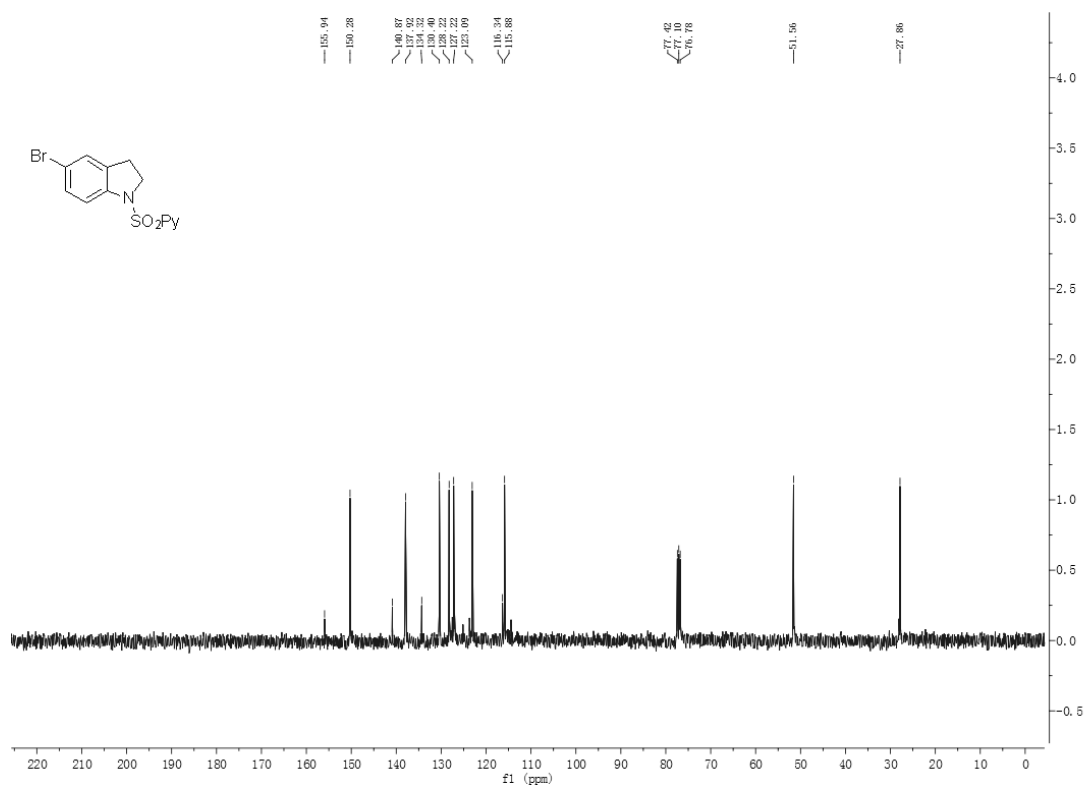



**(E)-Ethyl 3-(1-(pyridin-2-ylsulfonyl)indolin-7-yl)acrylate (3da)**

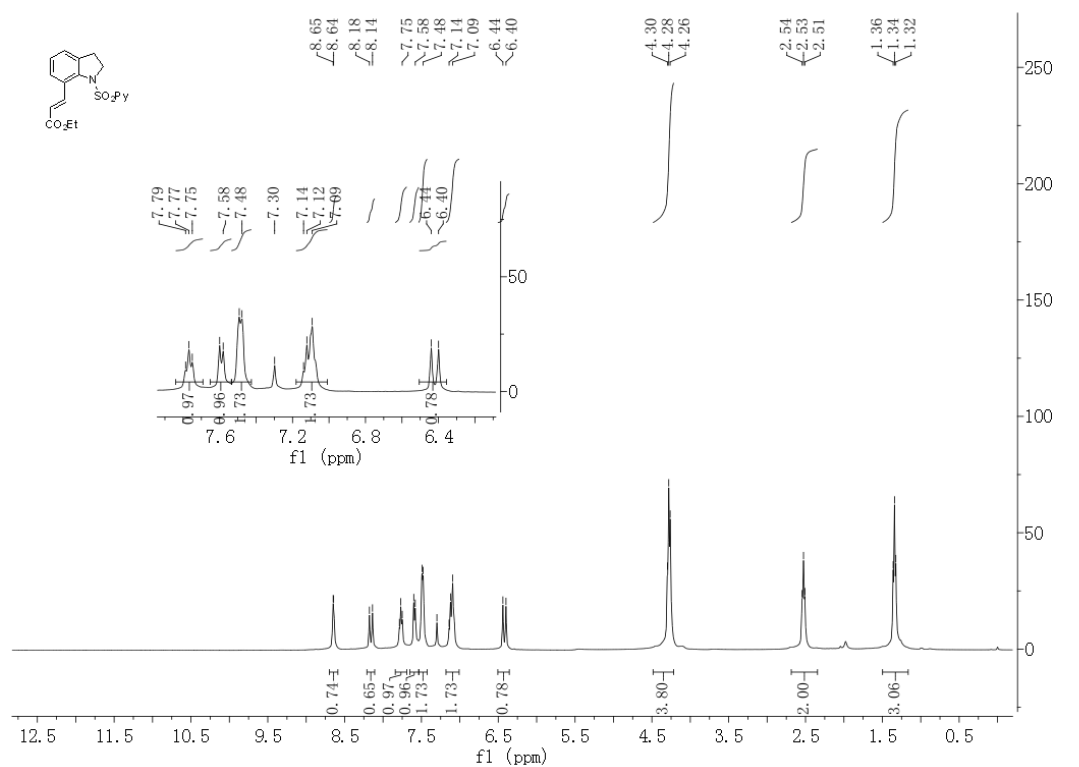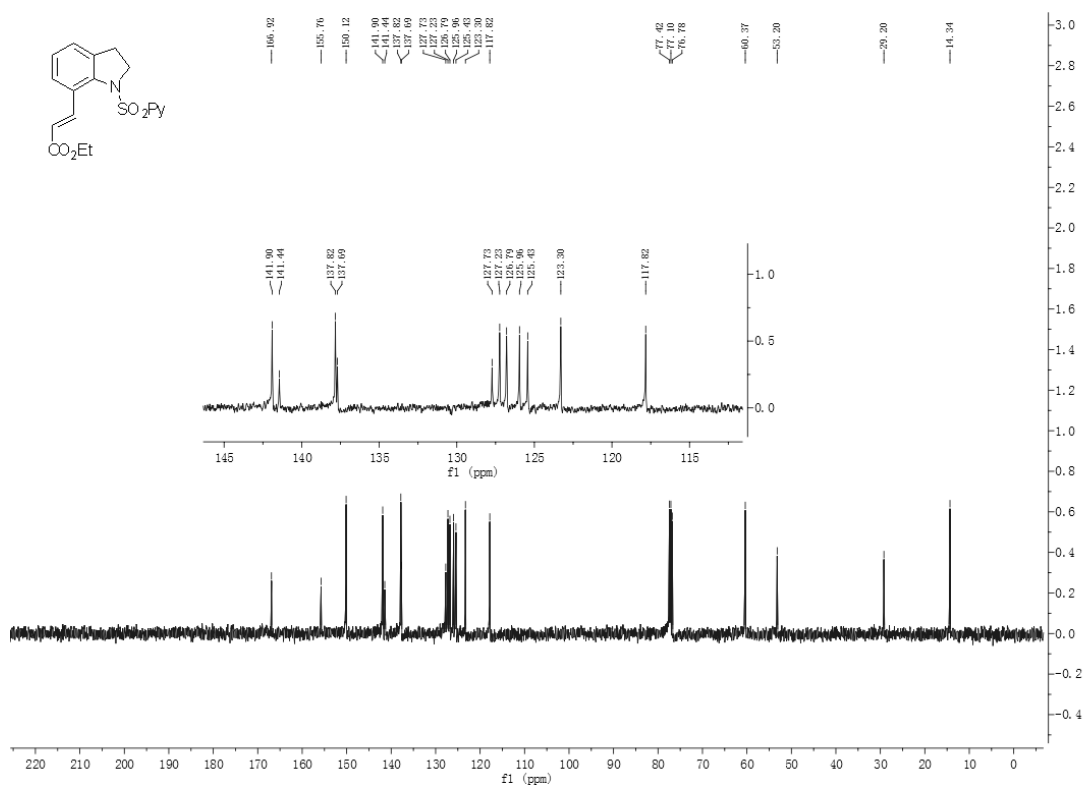

**(E)-Butyl 3-(1-(pyridin-2-ylsulfonyl)indolin-7-yl)acrylate (3db)**

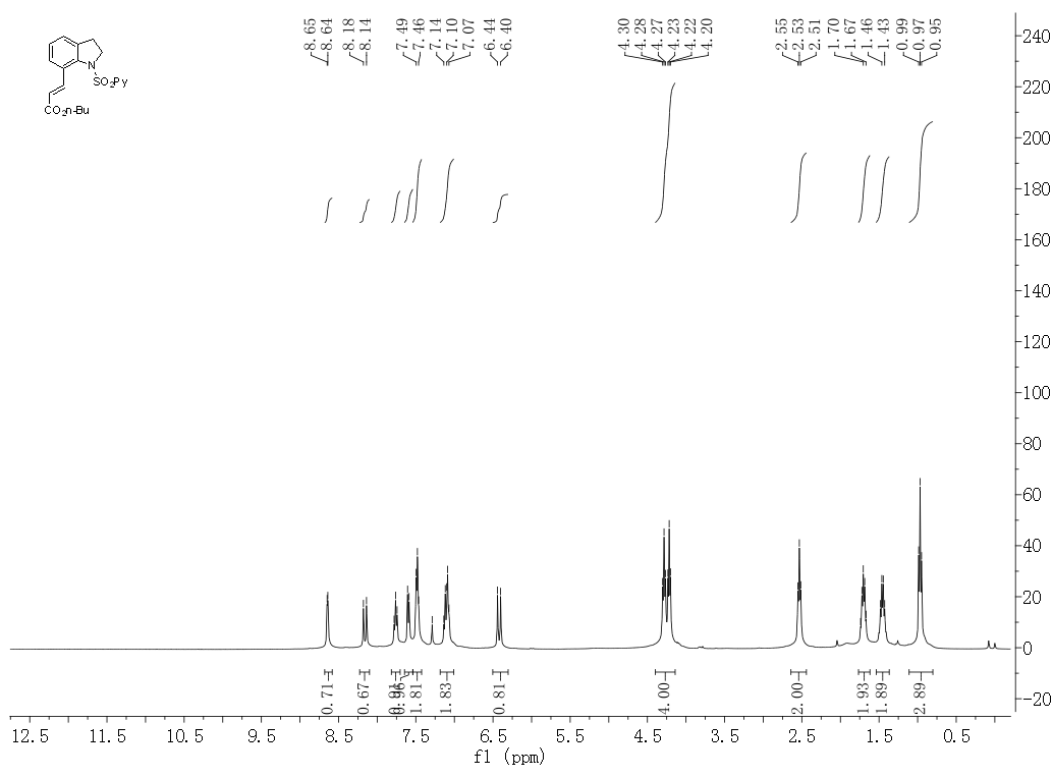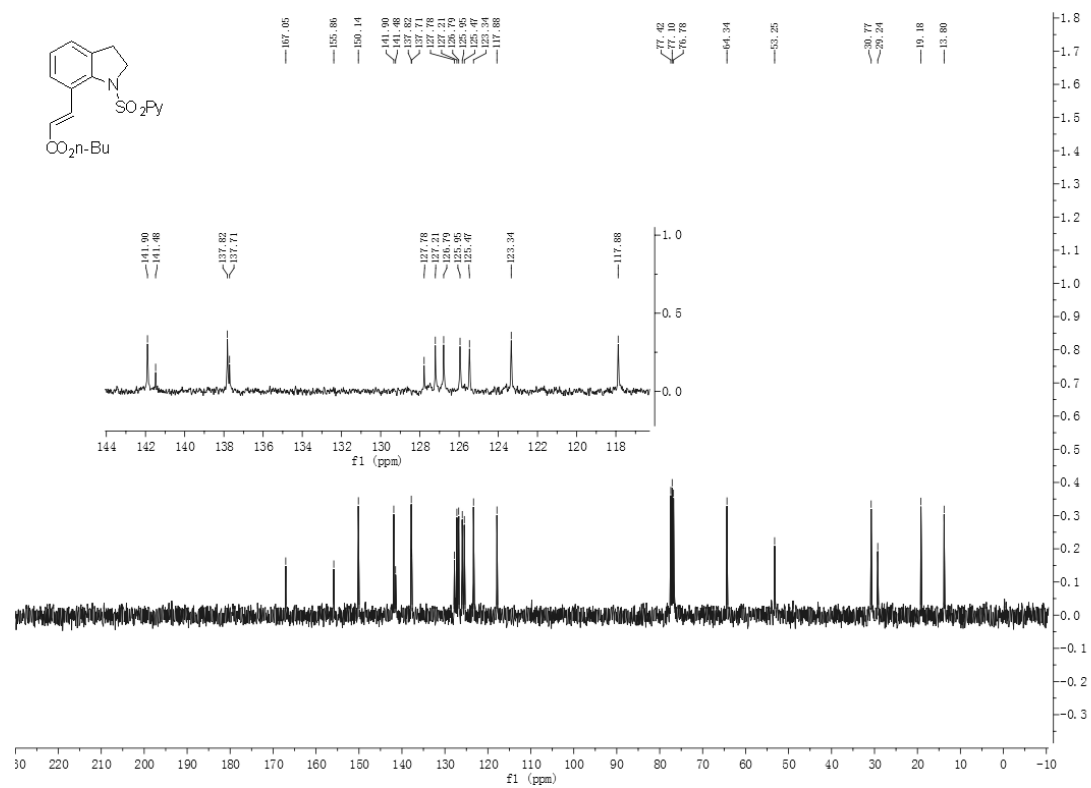

**(E)-2-Acetoxyethyl 3-(1-(pyridin-2-ylsulfonyl)indolin-7-yl)acrylate (3dc)**

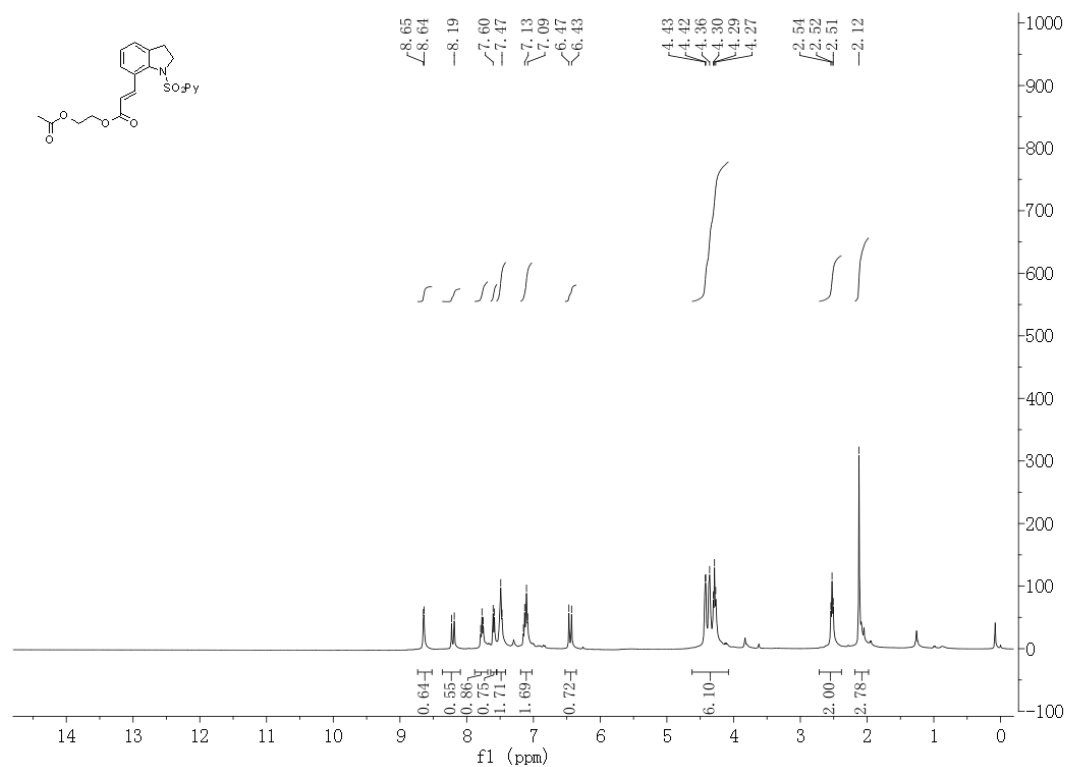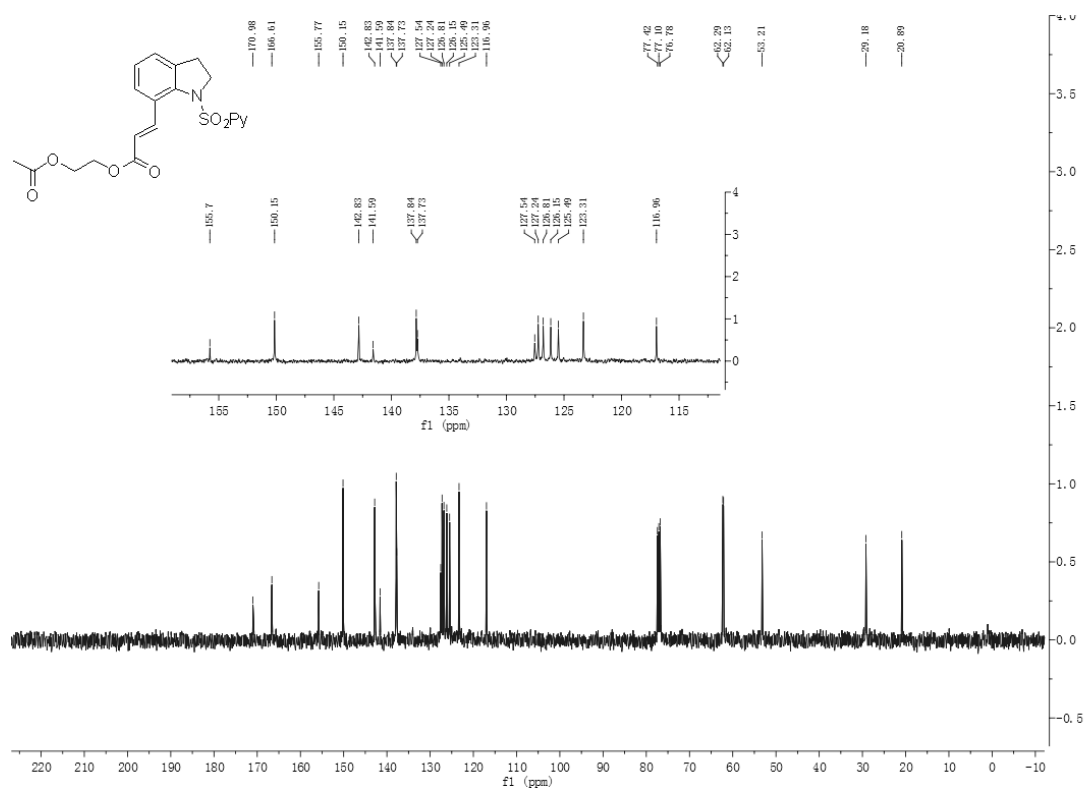

**(E)-1-(1-(Pyridin-2-ylsulfonyl)indolin-7-yl)pent-1-en-3-one (3dd)**

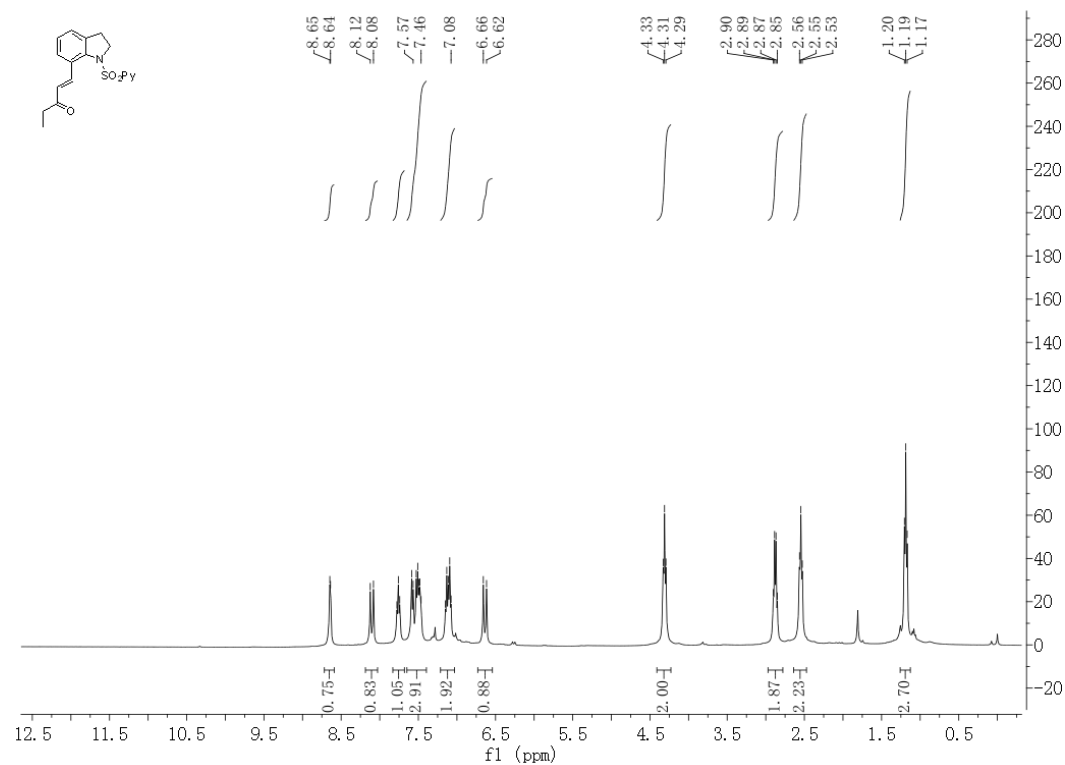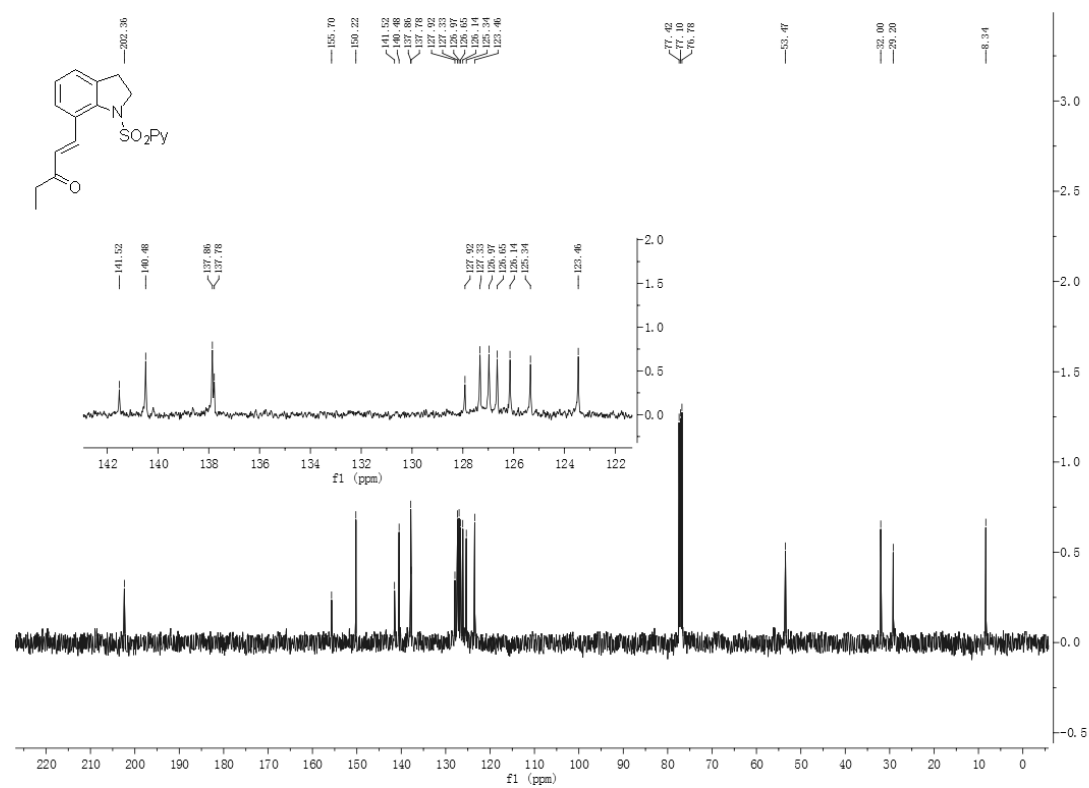

**(E)-N,N-Diethyl-3-(1-(pyridin-2-ylsulfonyl)indolin-7-yl) acrylamide (3de)**

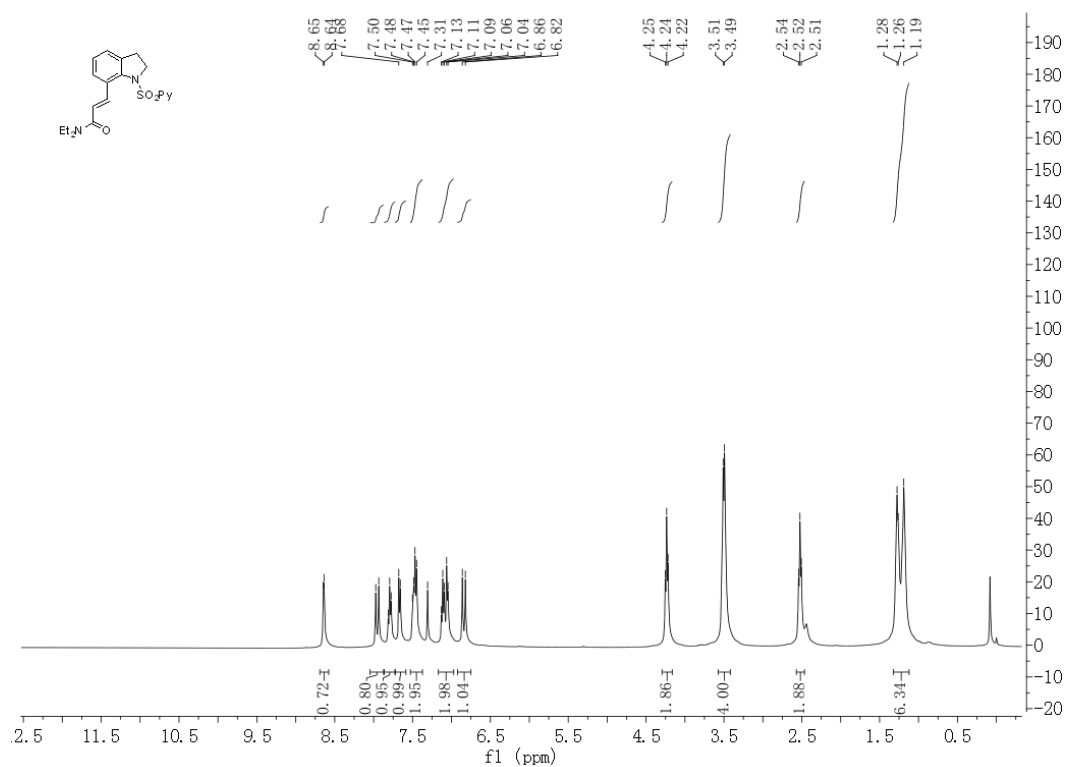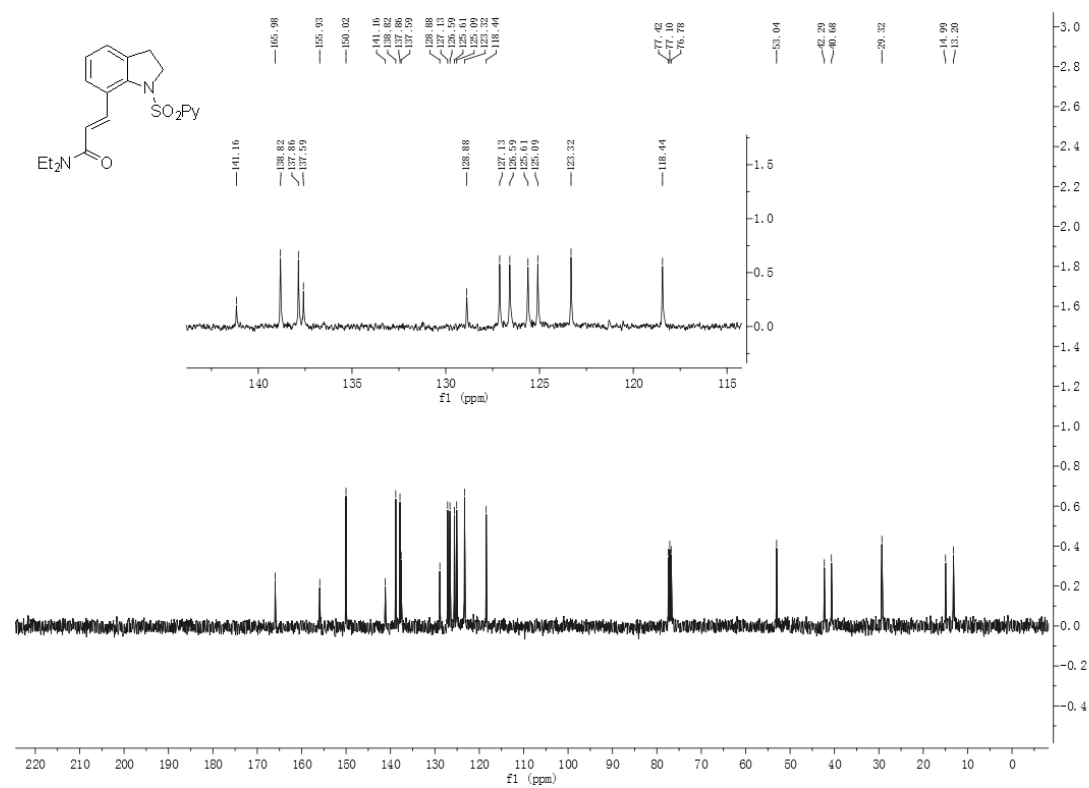

**(E)-1-(Pyridin-2-ylsulfonyl)-7-styrylindoline (3df)**

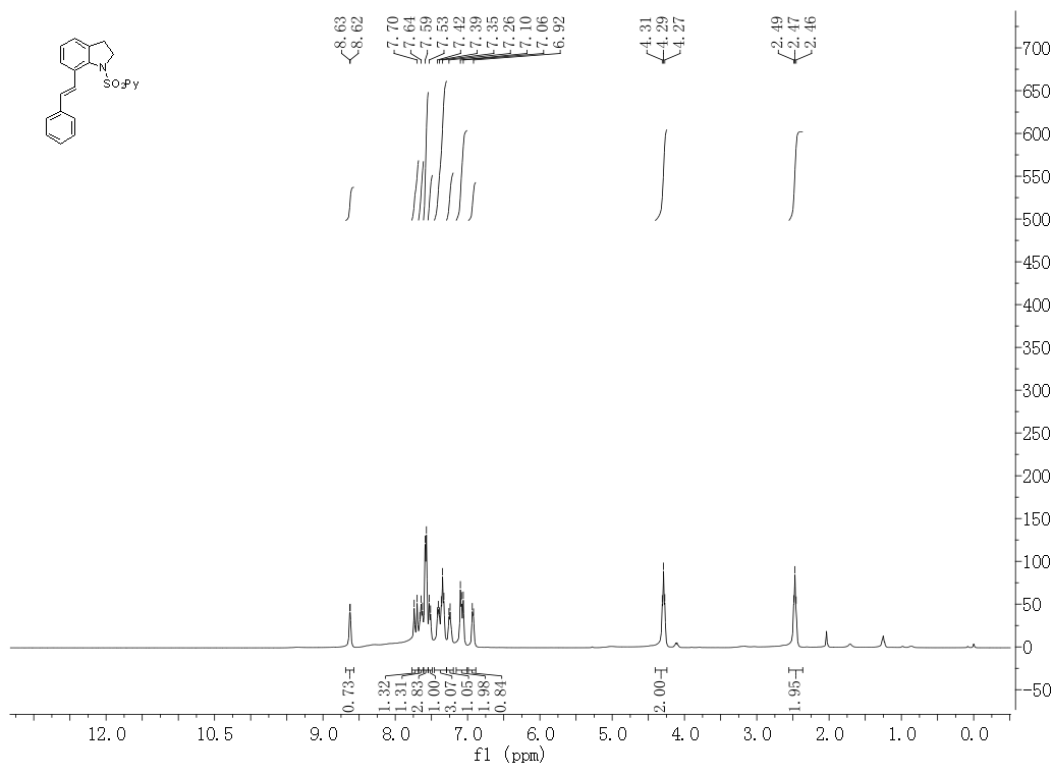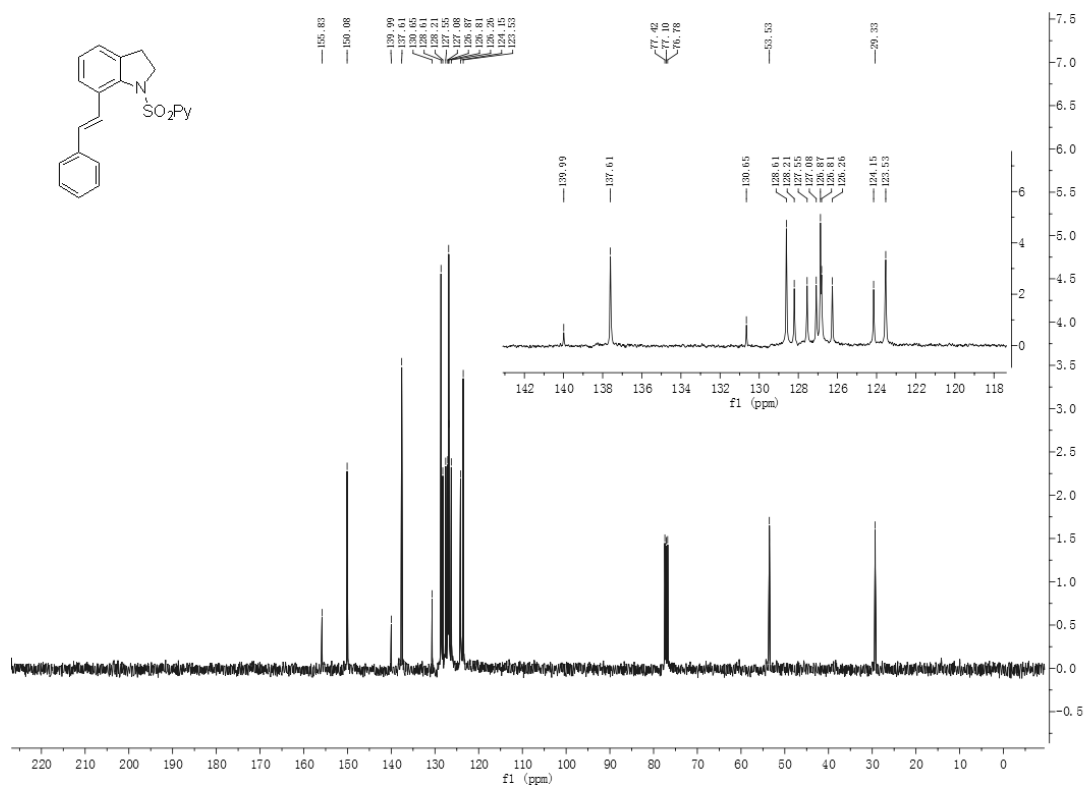

**(E)-7-(4-Fluorostyryl)-1-(pyridin-2-ylsulfonyl)indoline (3dg)**

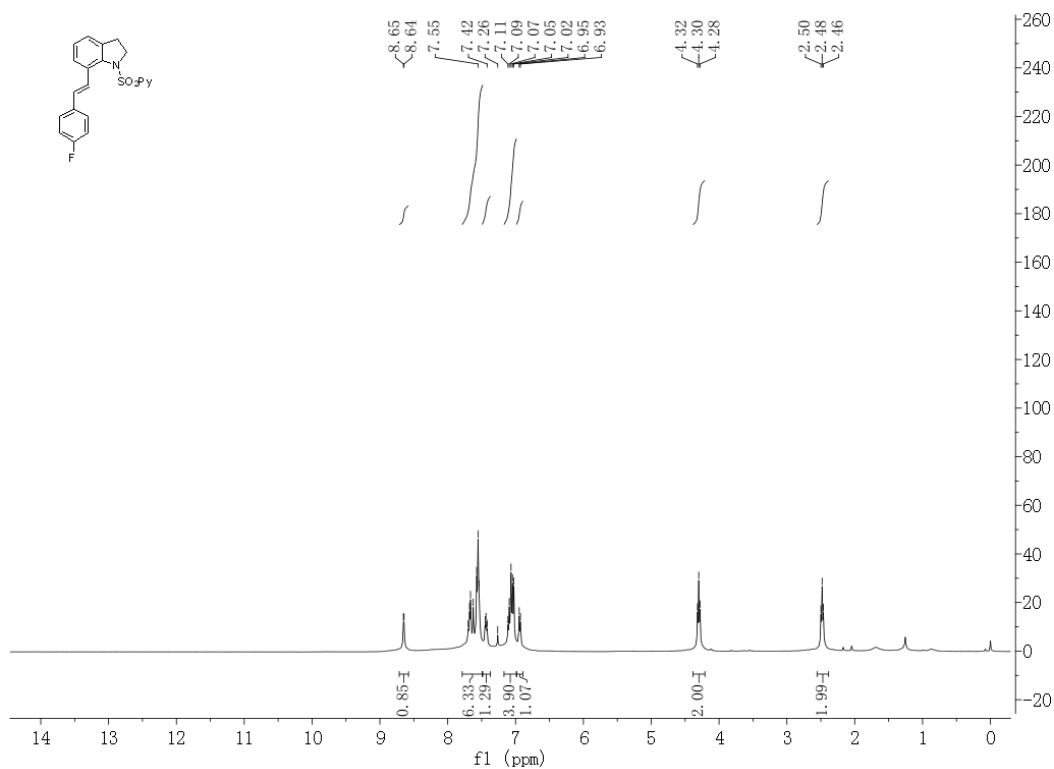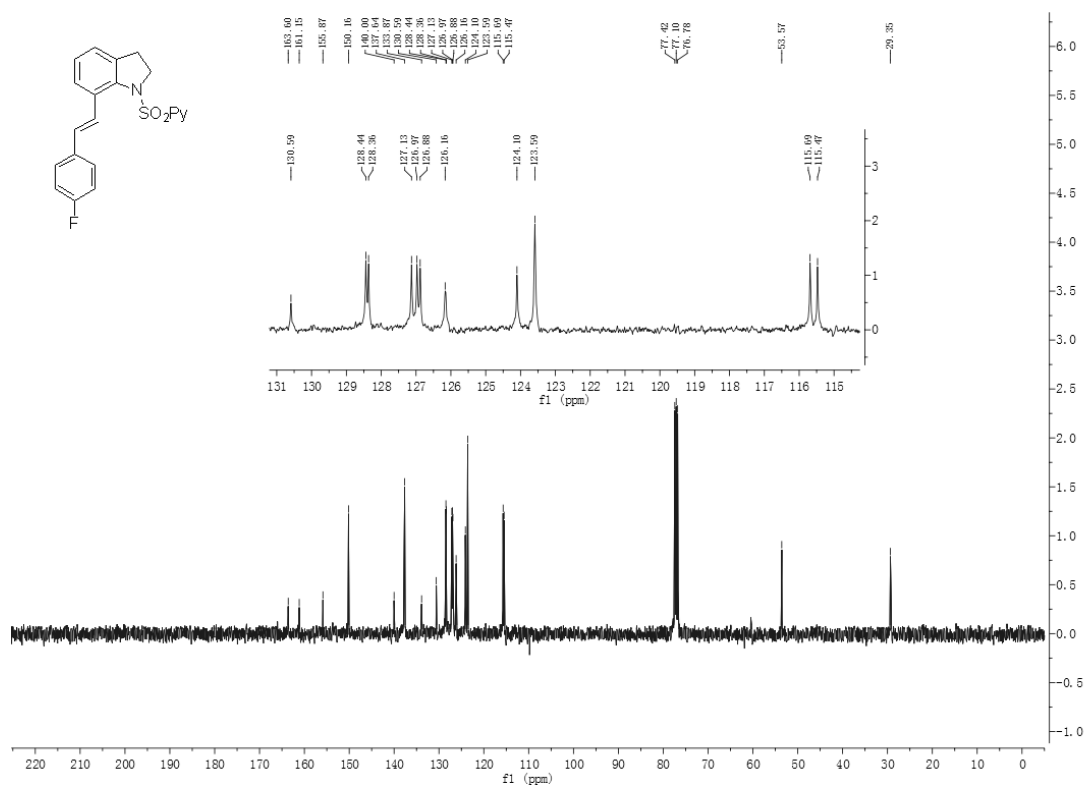

**(E)-7-(2-Chlorostyryl)-1-(pyridin-2-ylsulfonyl)indoline (3dh)**

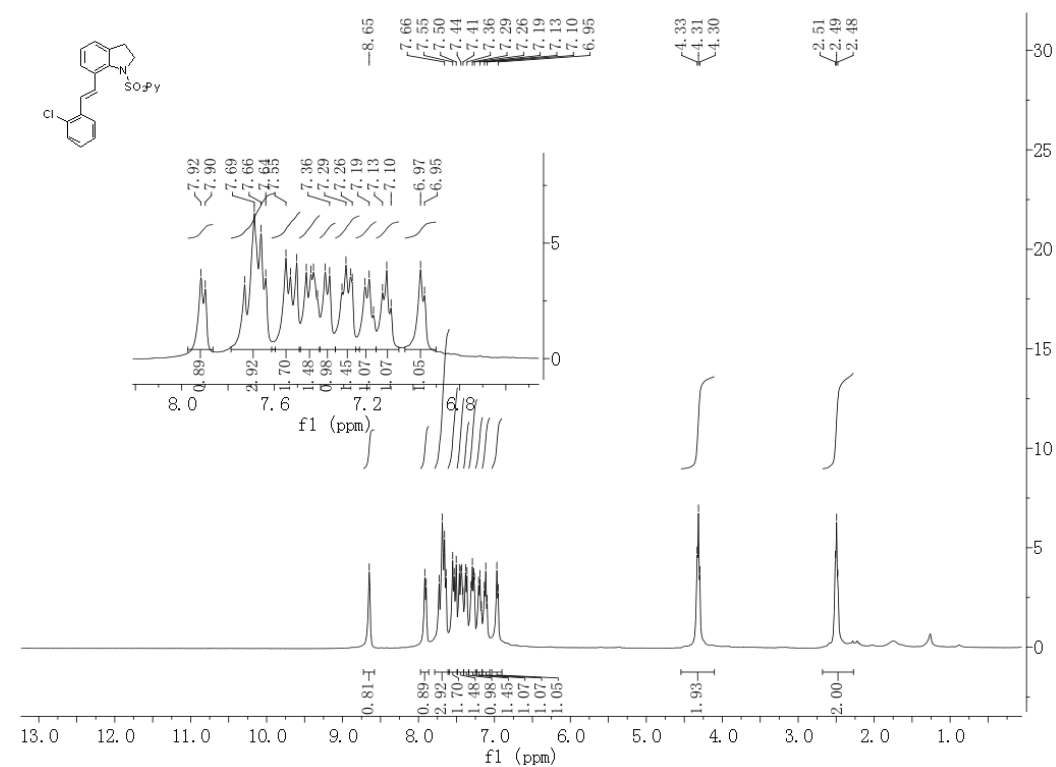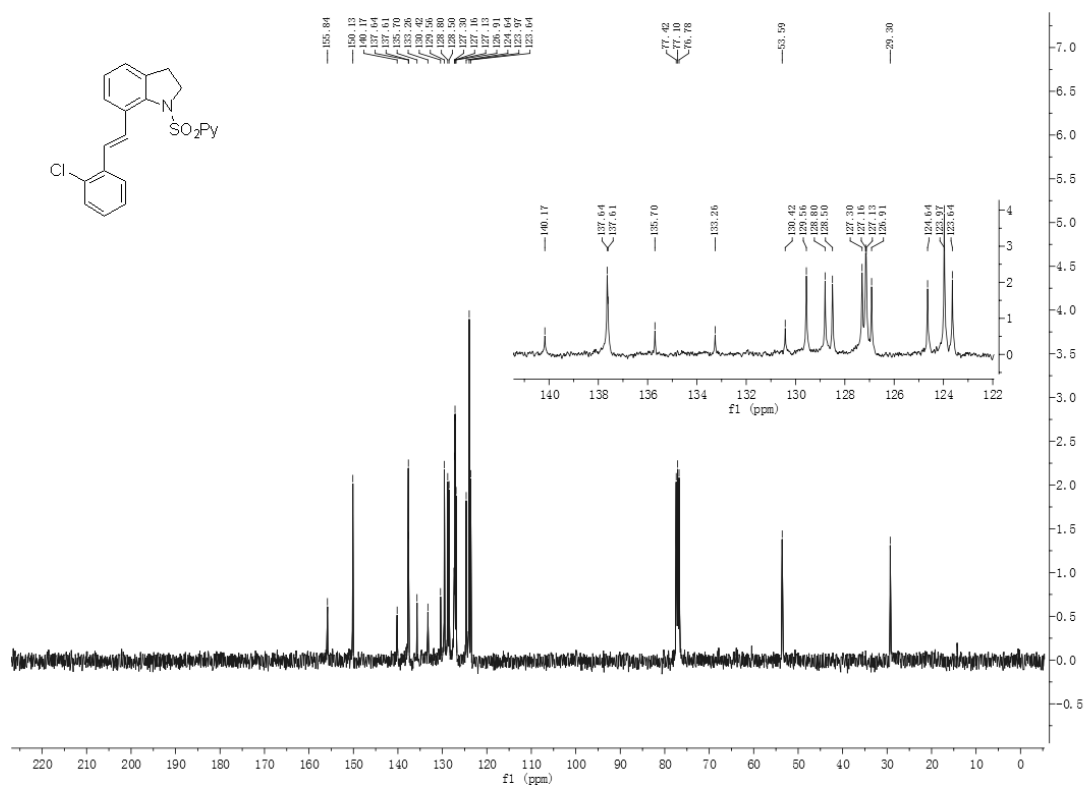



**(E)-7-(3-Chlorostyryl)-1-(pyridin-2-ylsulfonyl)indoline (3di)**

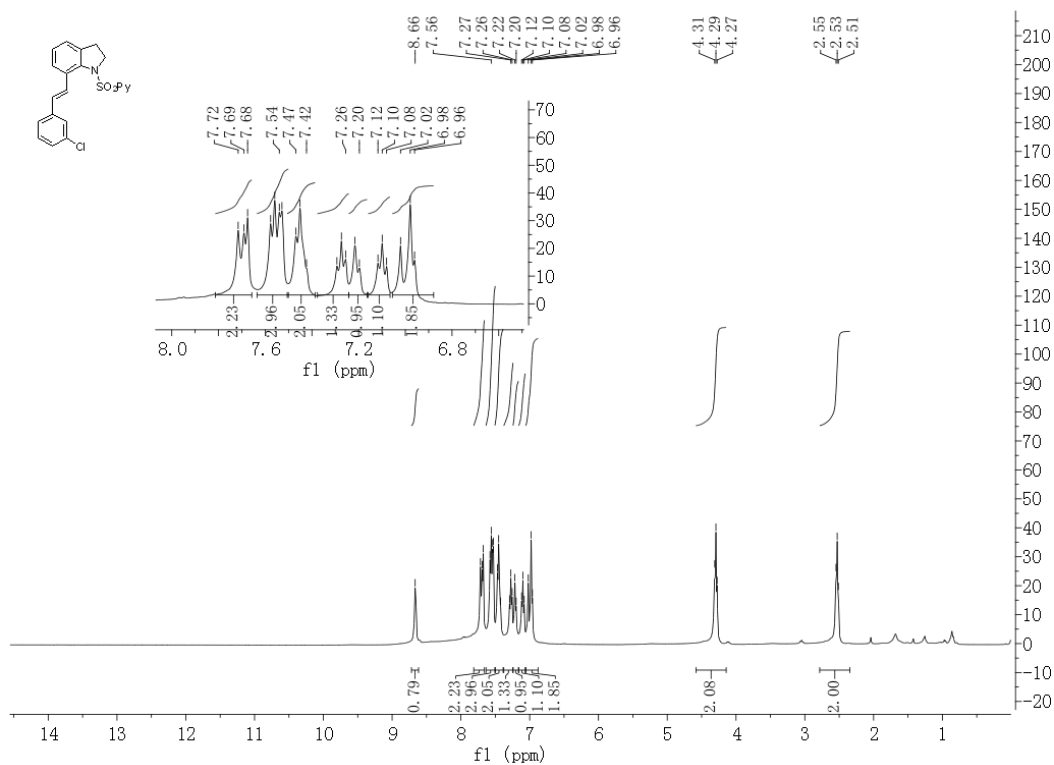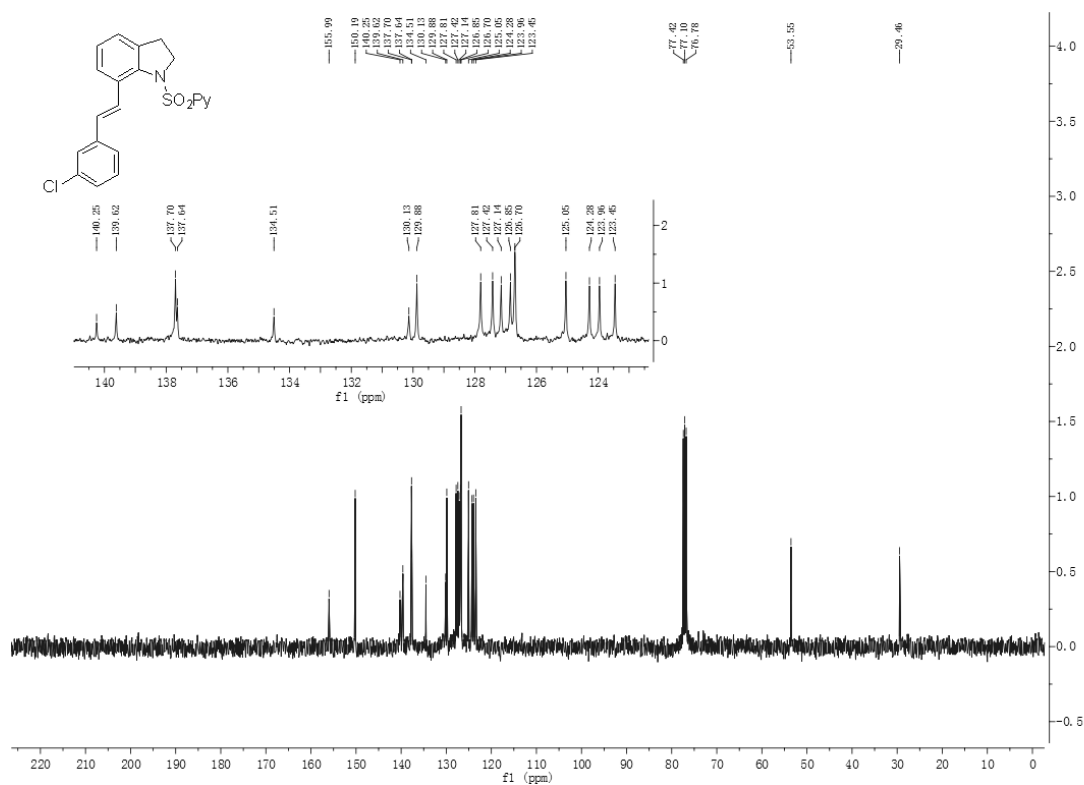

**(E)-Diethyl2-(1-(pyridin-2-ylsulfonyl)indolin-7-yl)vinylphosphonate (3dj)**

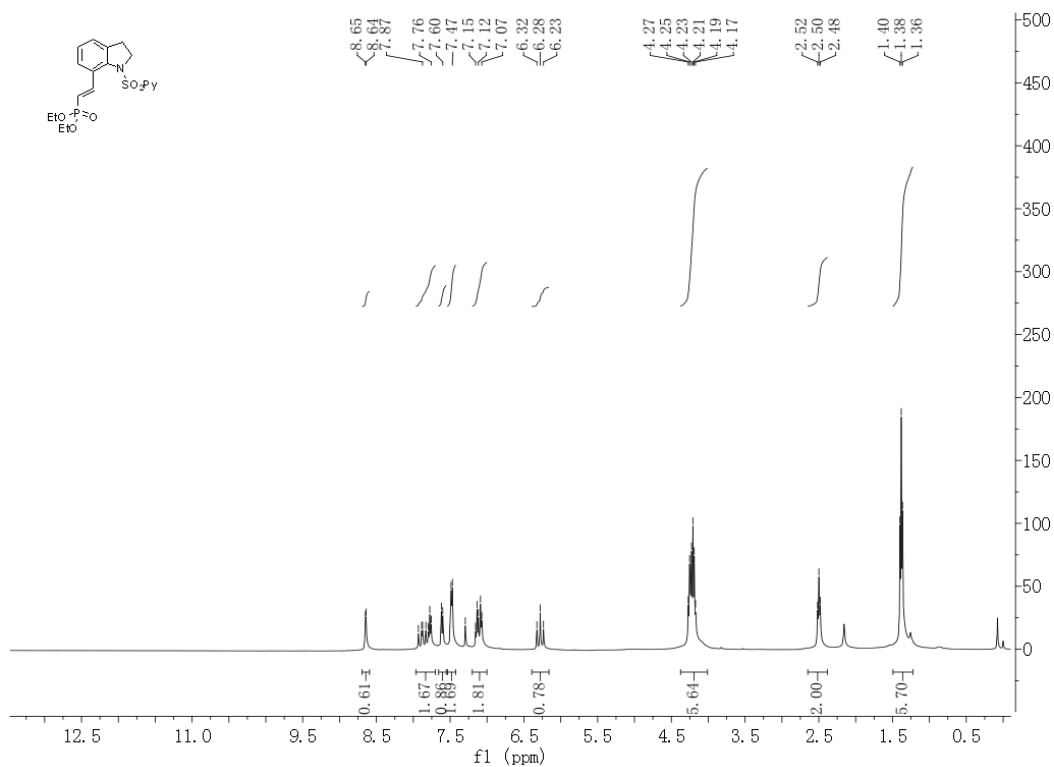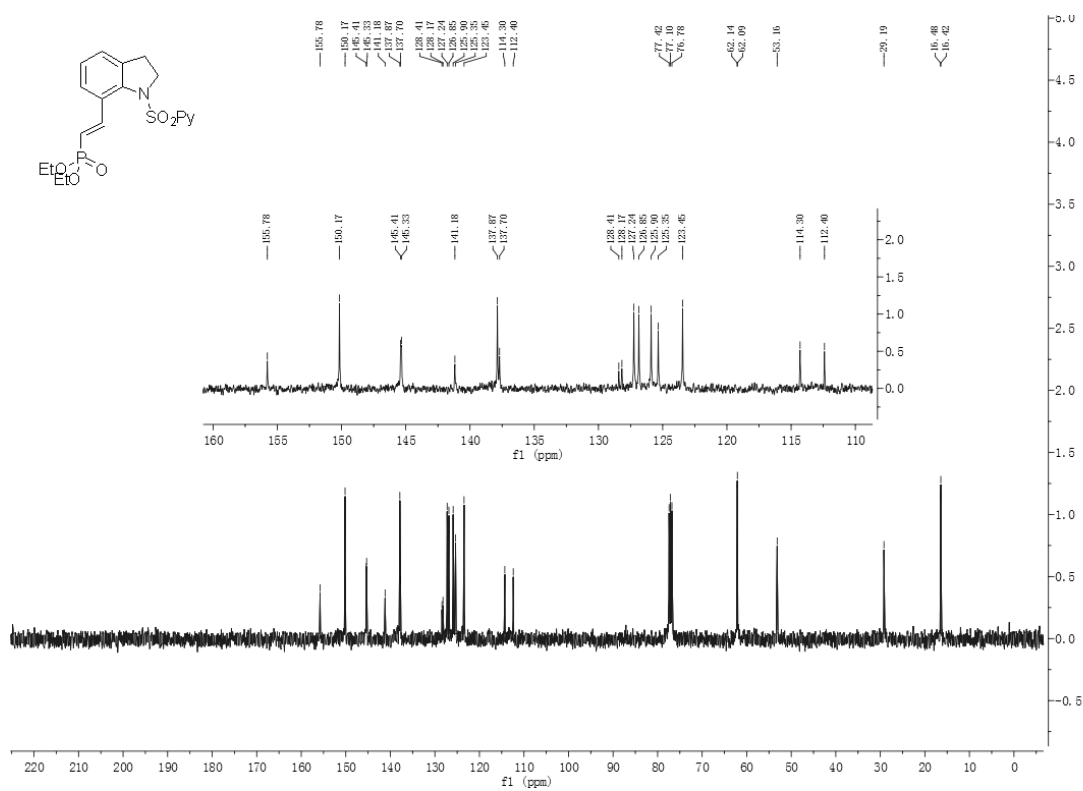

# Methyl 2-((1-(pyridin-2-ylsulfonyl)indolin-7-yl)methyl)acrylate (3dk)

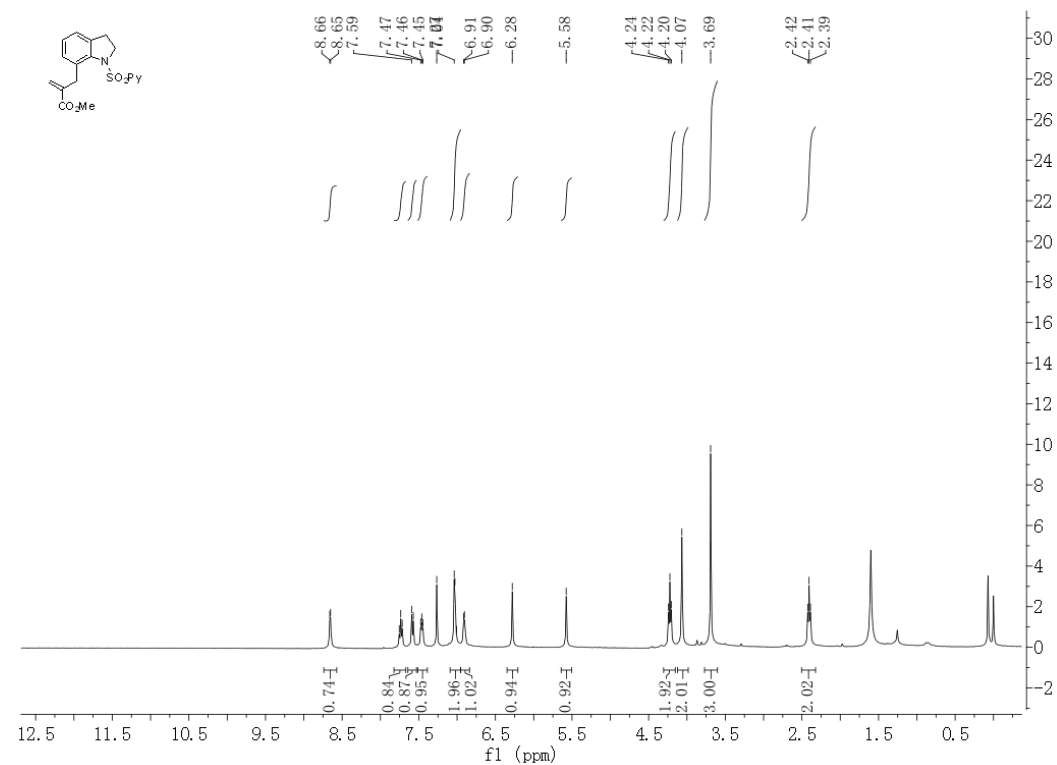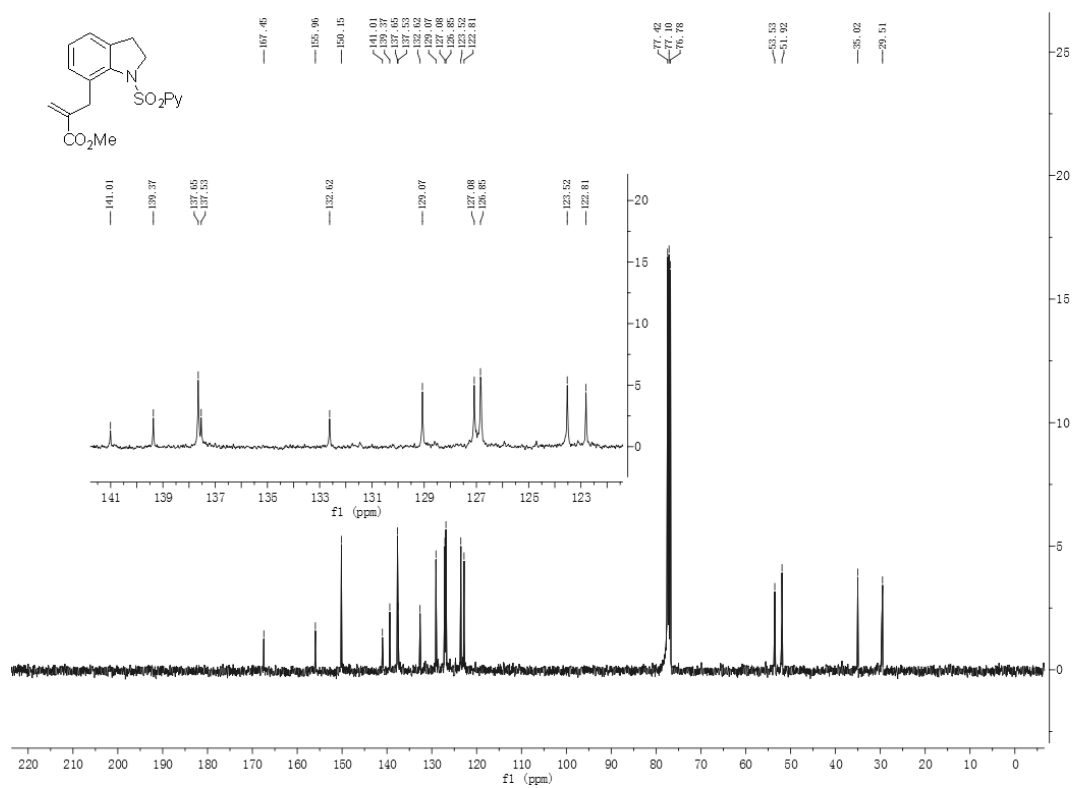

**(E)-Methyl 3-(1-(pyridin-2-ylsulfonyl)indolin-7-yl)but-2-enoate (3dl)**

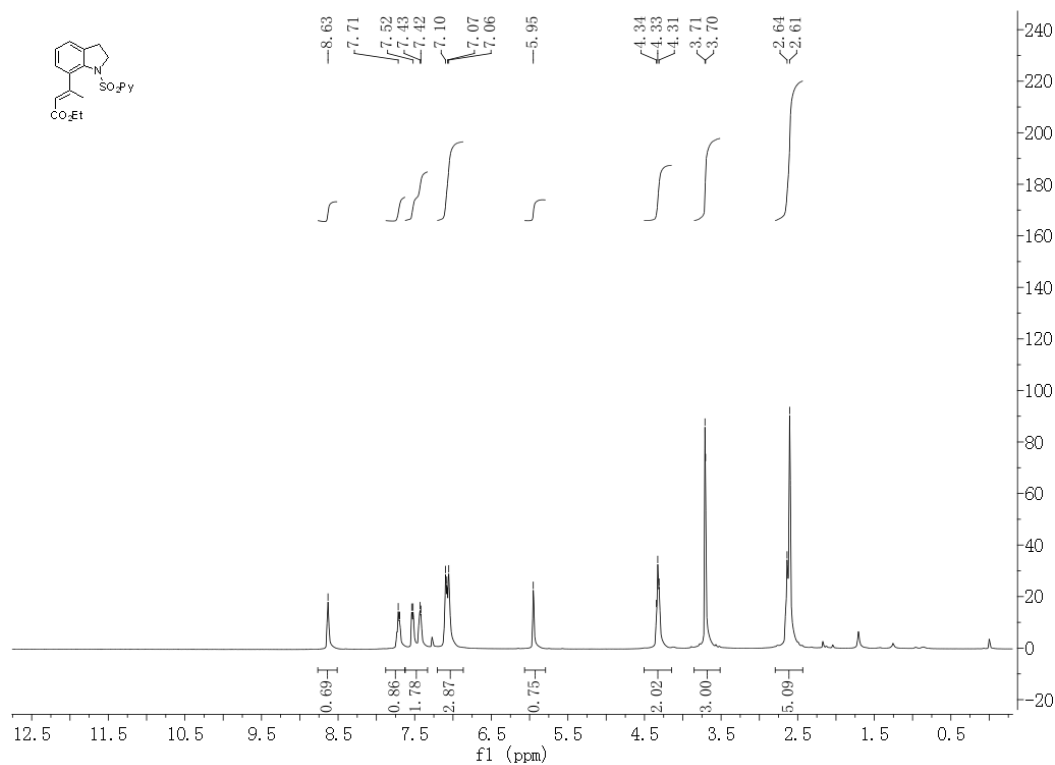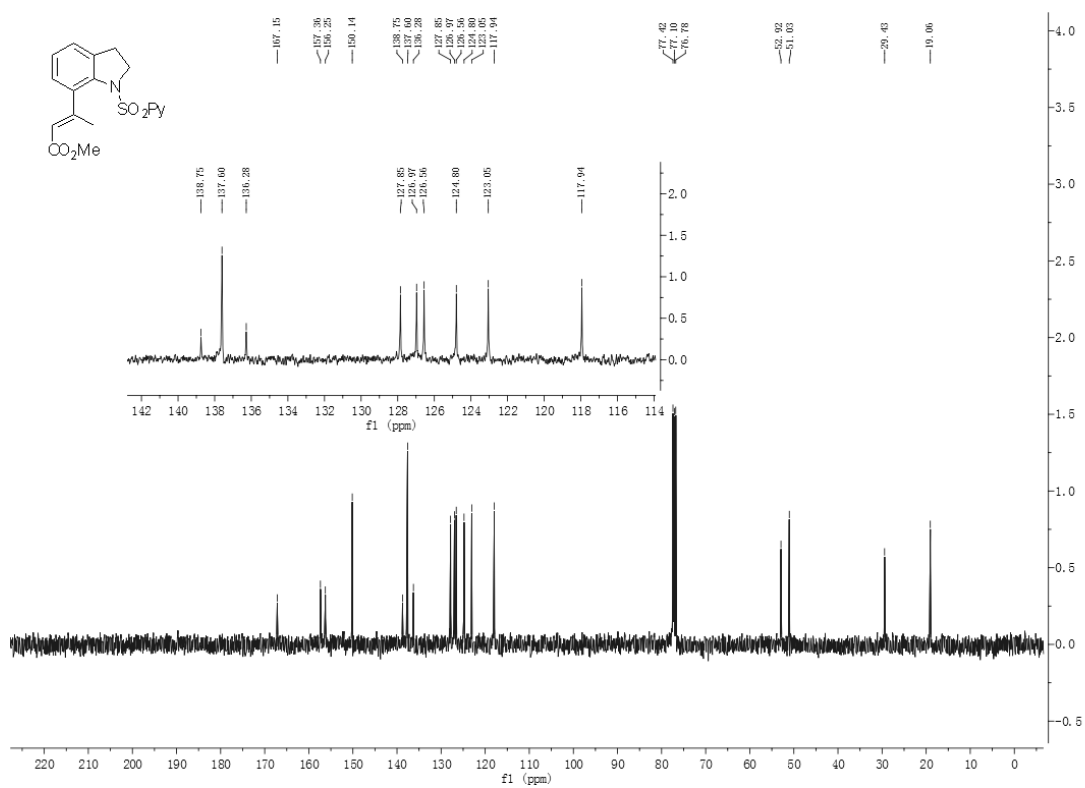

**(E)-Dimethyl 2-(1-(pyridin-2-ylsulfonyl)indolin-7-yl)maleate (3dm)**

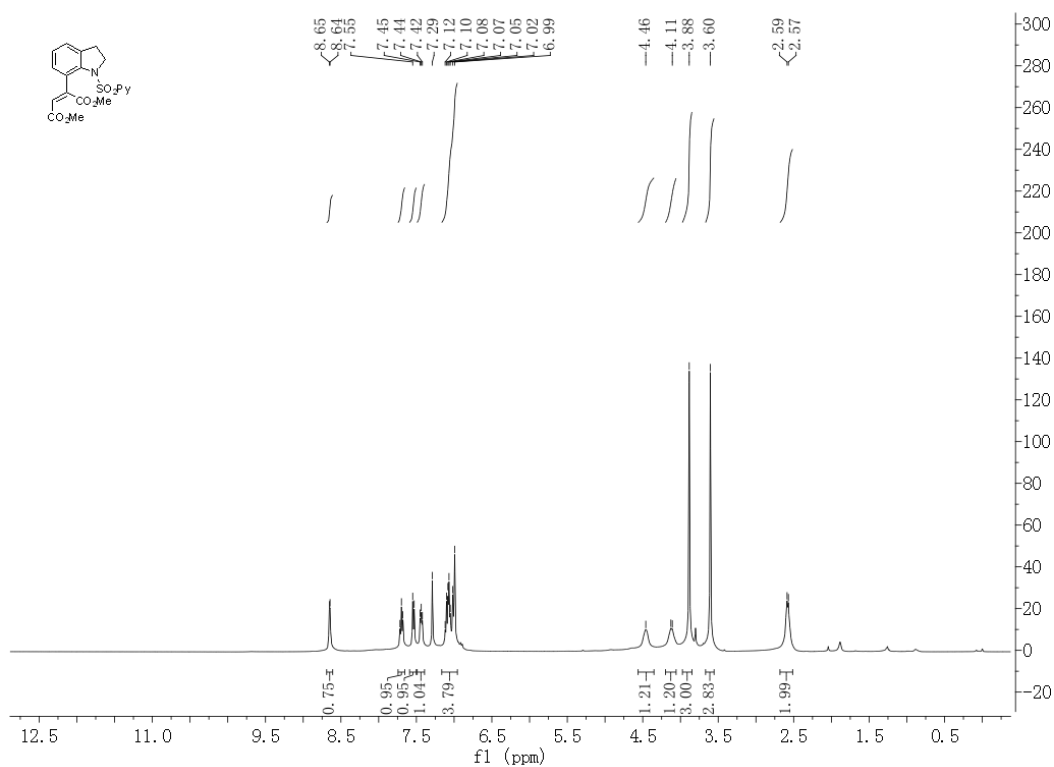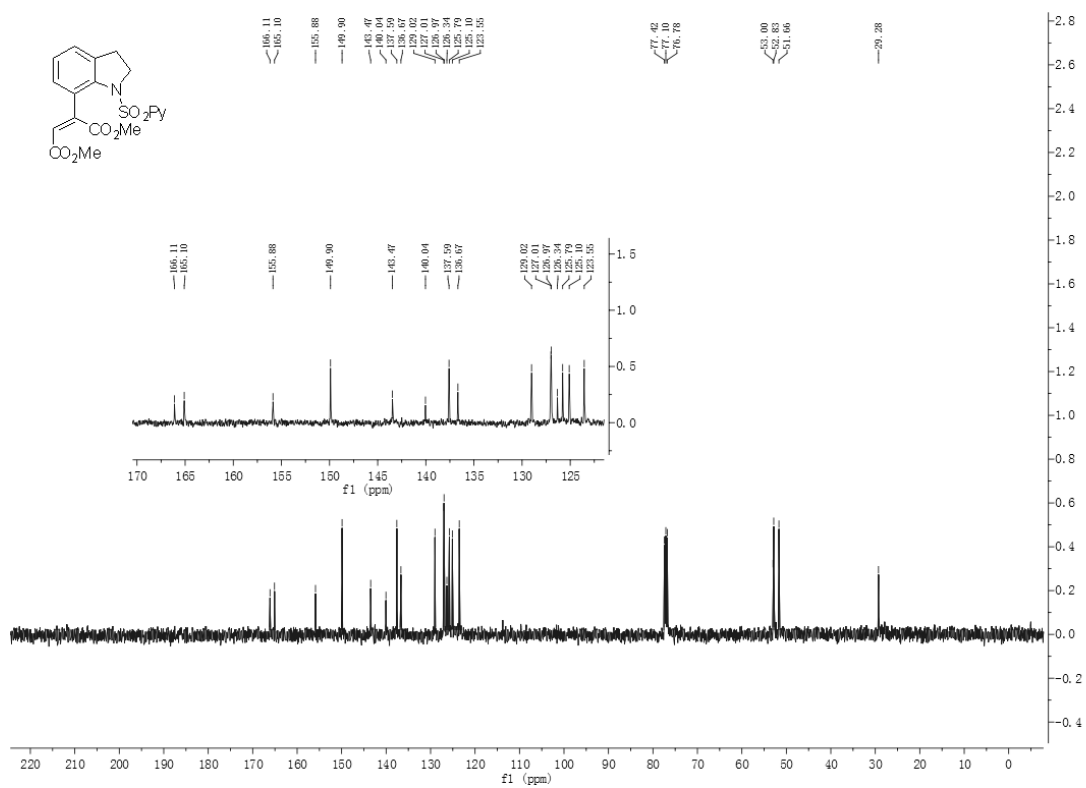

**(E)-Butyl 3-(2-methyl-1-(pyridin-2-ylsulfonyl)indolin-7-yl)acrylate (3eb)**

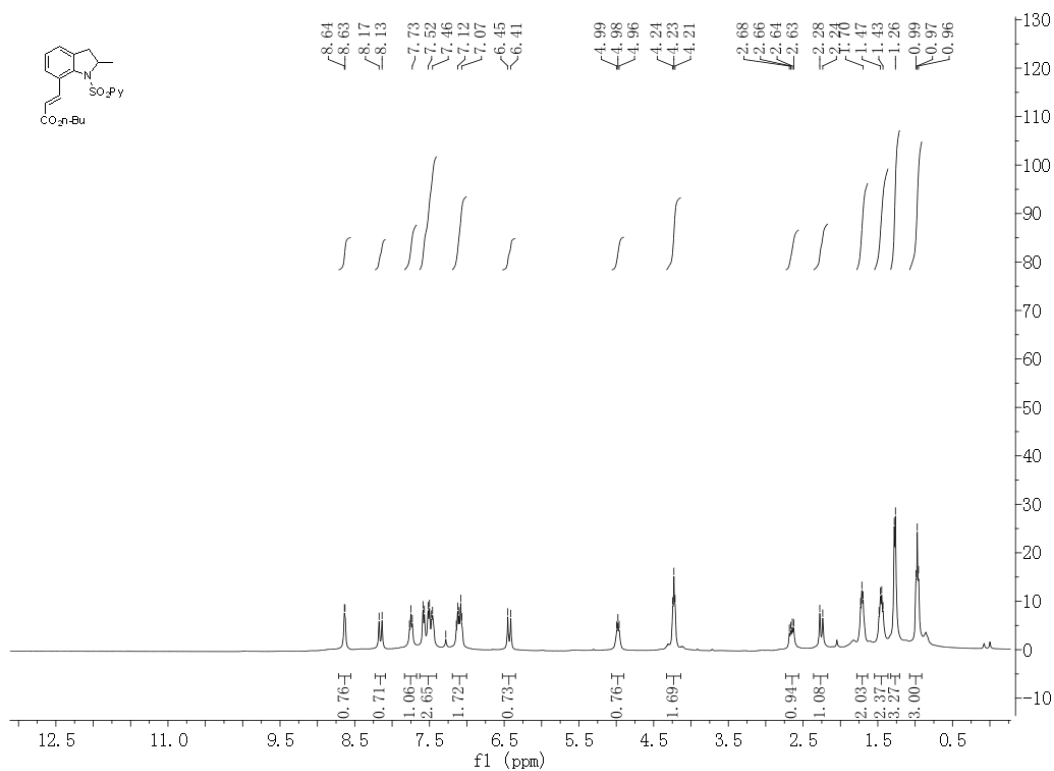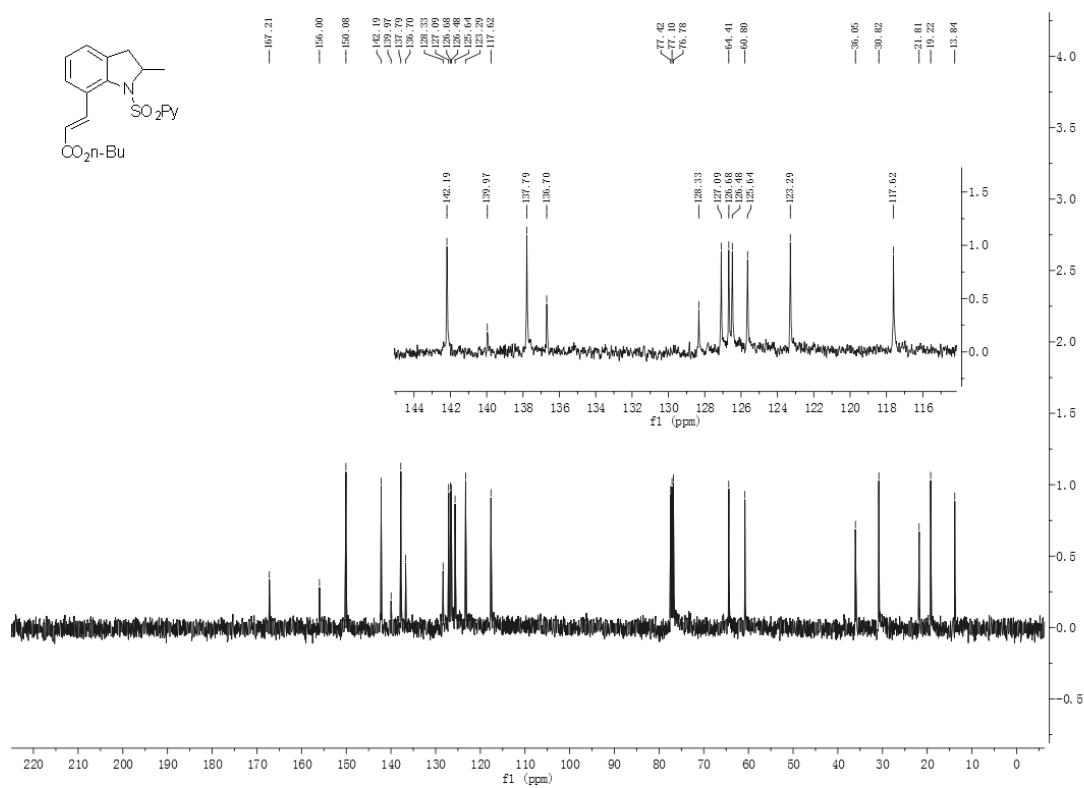

**(E)-7-(4-Fluorostyryl)-2-methyl-1-(pyridin-2-ylsulfonyl)indoline (3eg)**

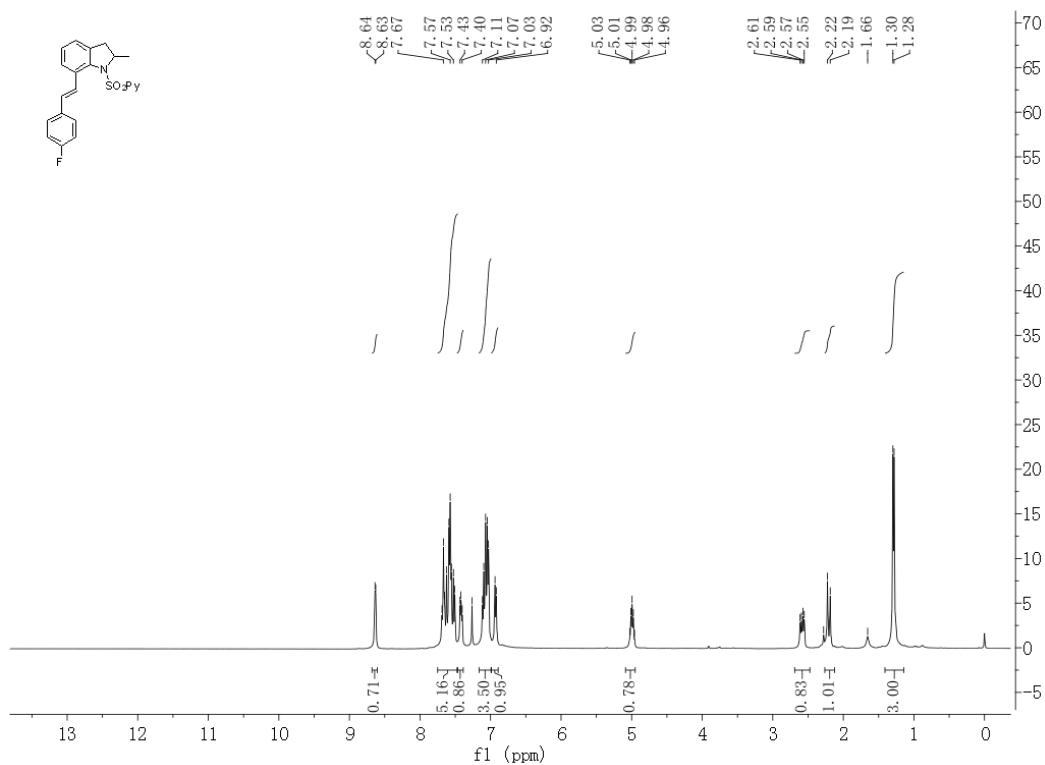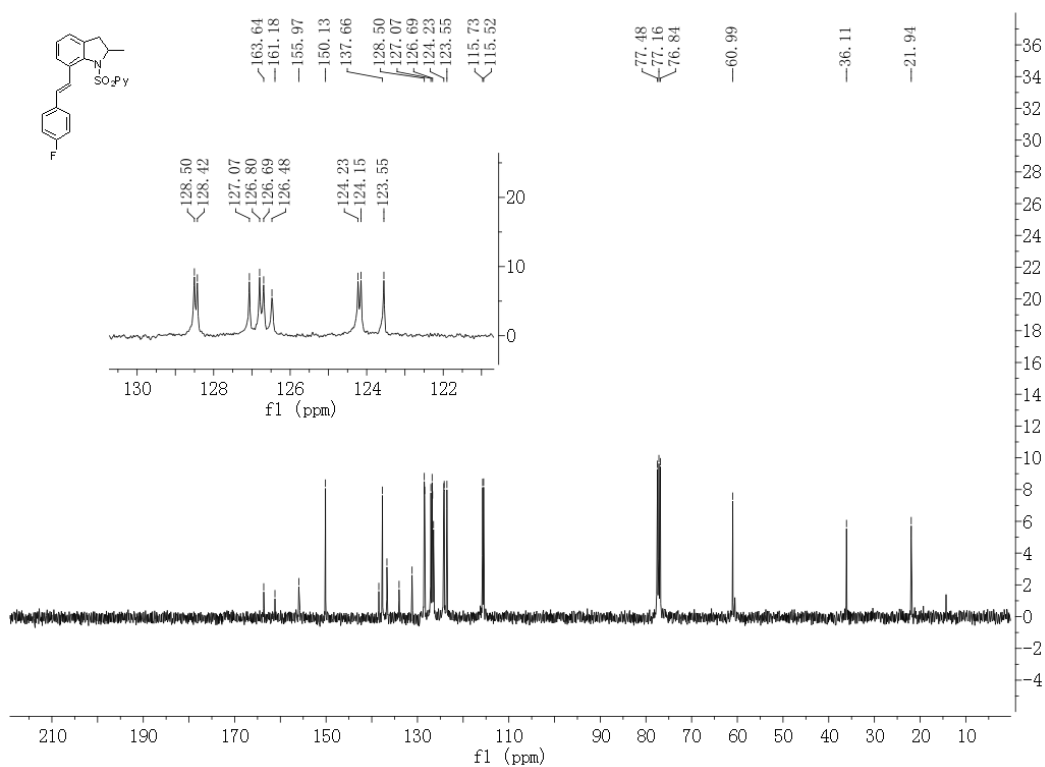

**(E)-Butyl 3-(3-methyl-1-(pyridin-2-ylsulfonyl)indolin-7-yl)acrylate (3fb)**

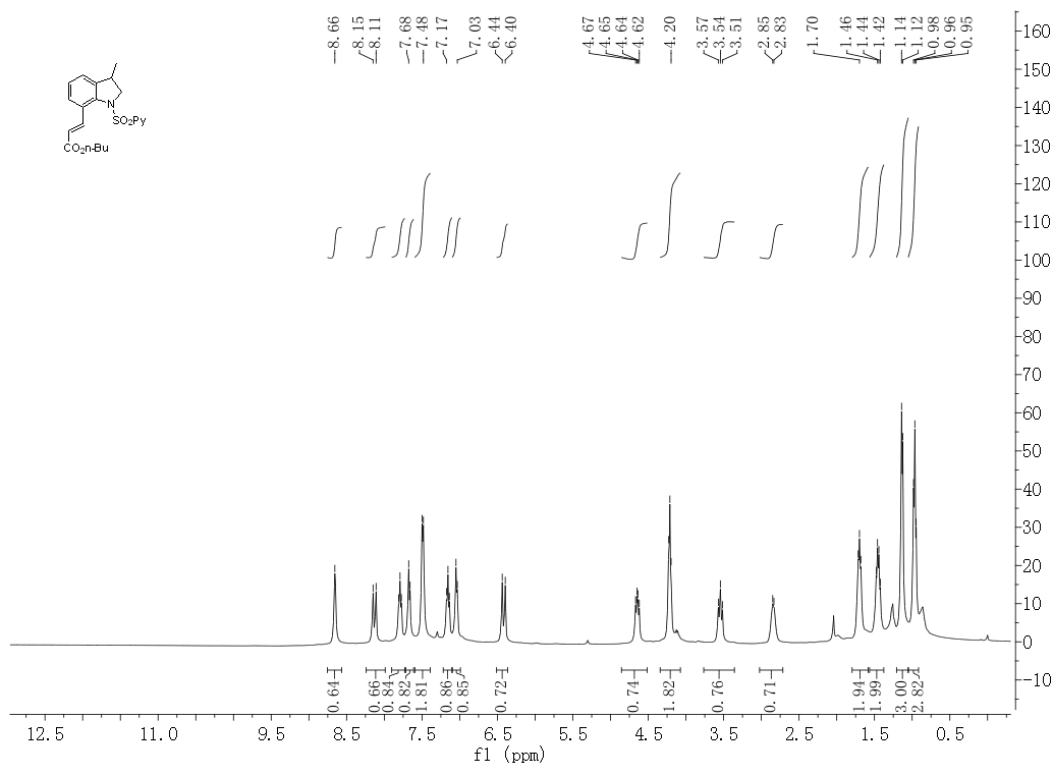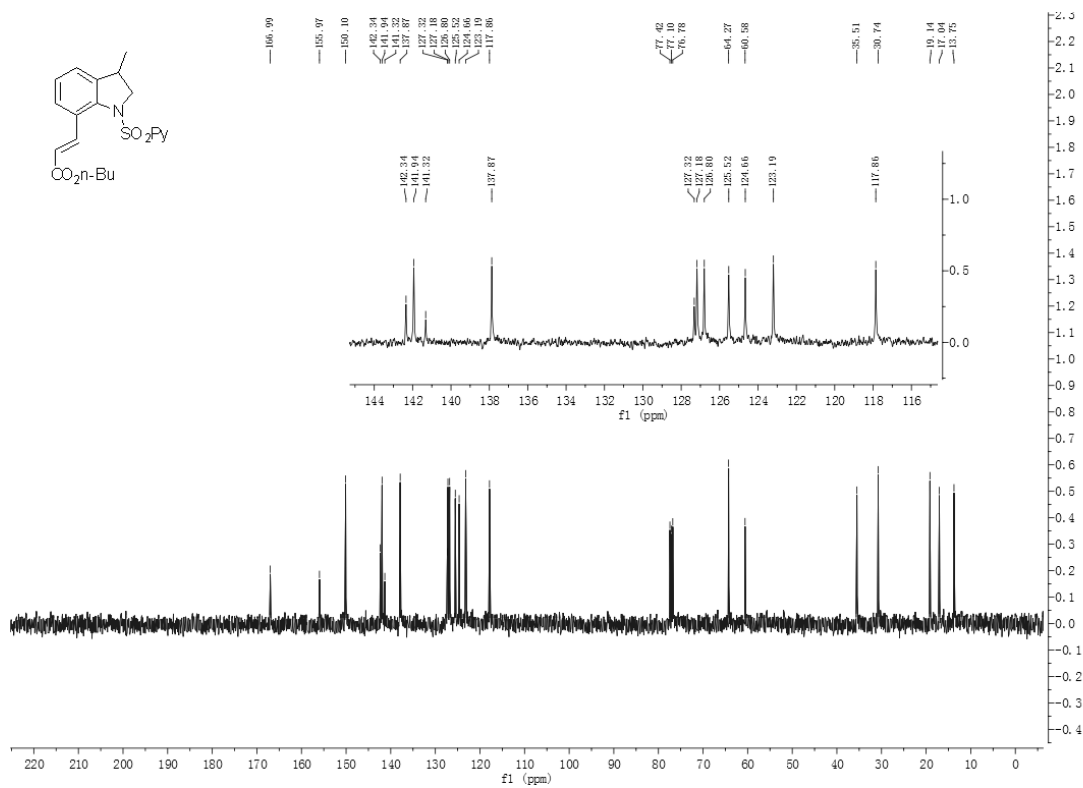



(E)-7-(4-Fluorostyryl)-3-methyl-1-(pyridin-2-ylsulfonyl)indoline (3fg)

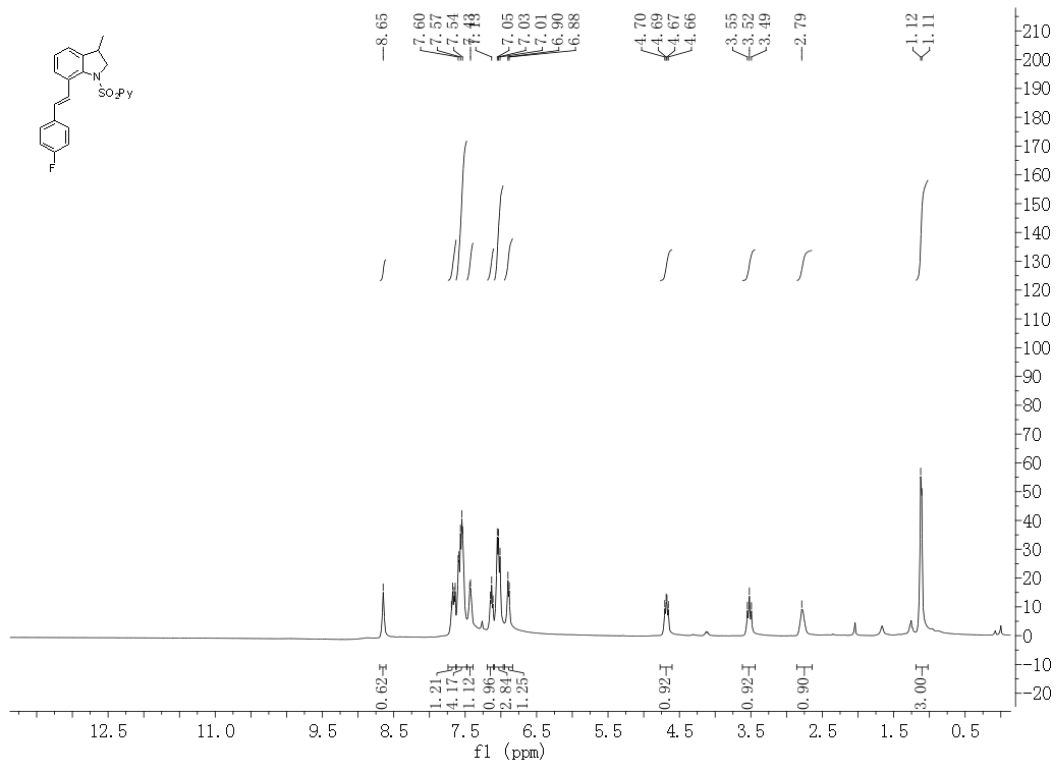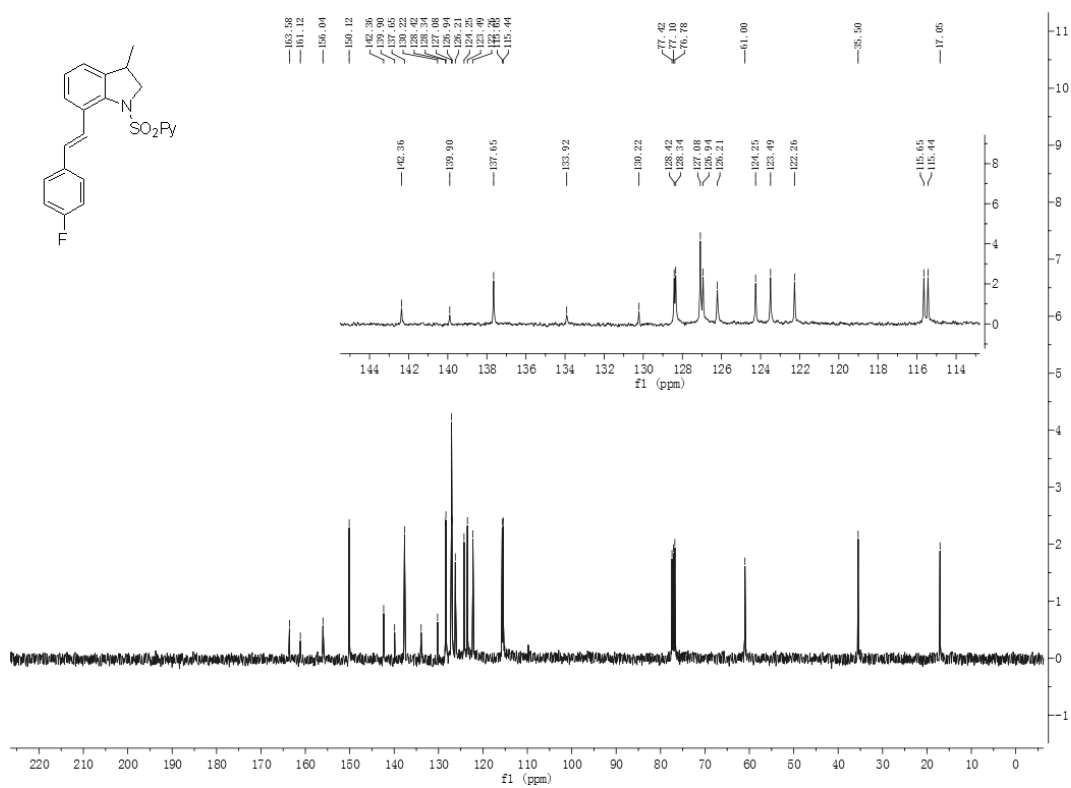

**(E)-Butyl-3-(5-methyl-1-(pyridin-2-ylsulfonyl)indolin-7-yl)acrylate (3gb)**

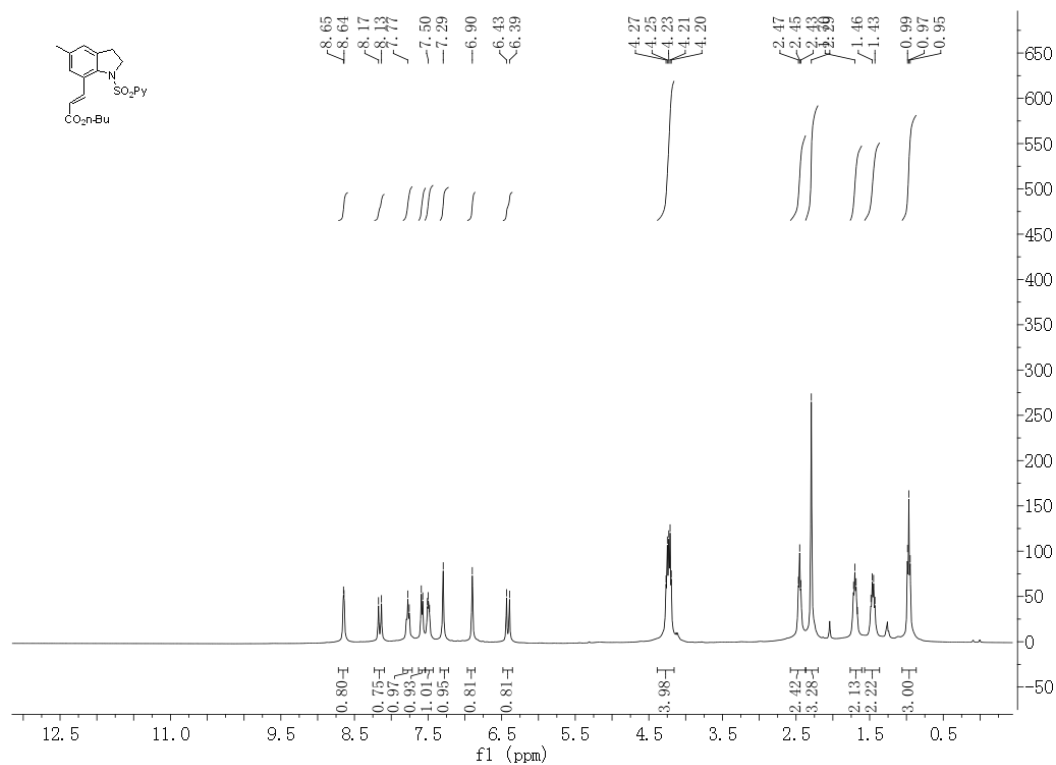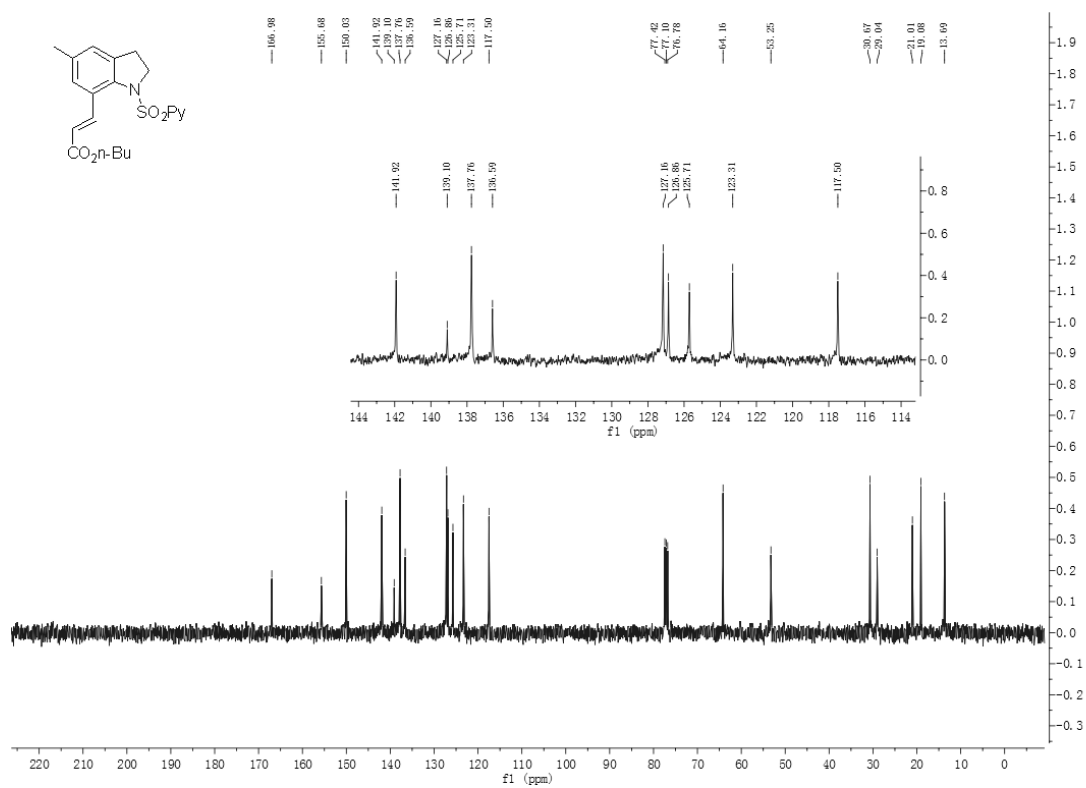

**(E)-7-(4-Fluorostyryl)-5-methyl-1-(pyridin-2-ylsulfonyl)indoline (3gg)**

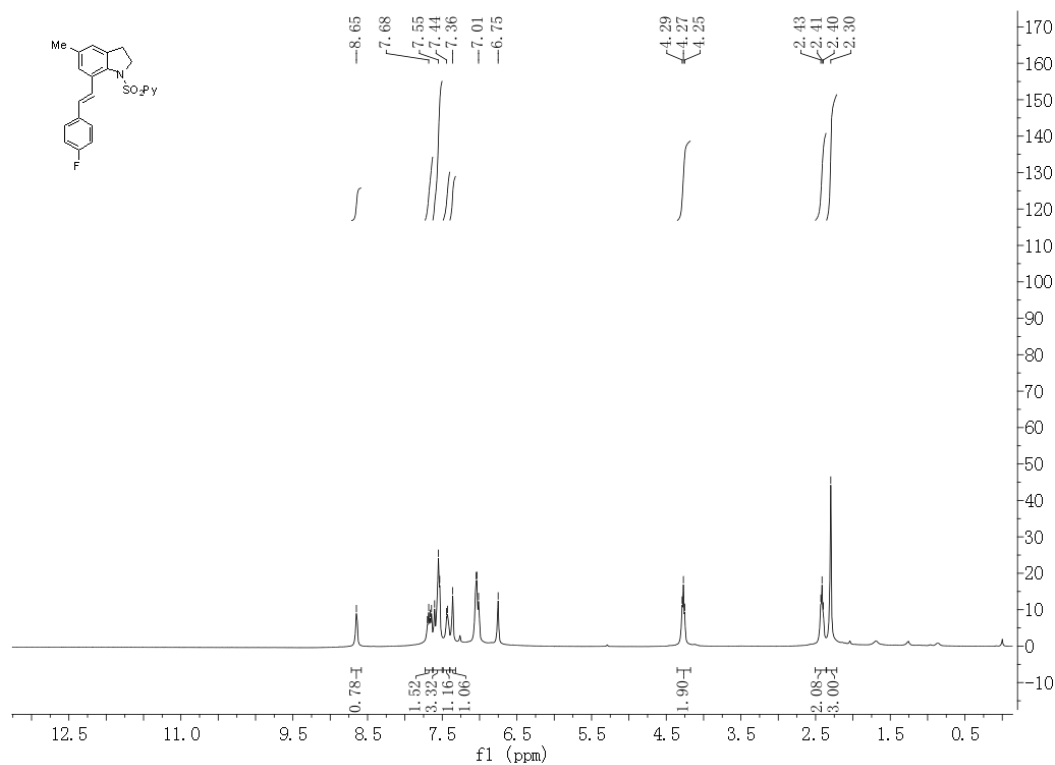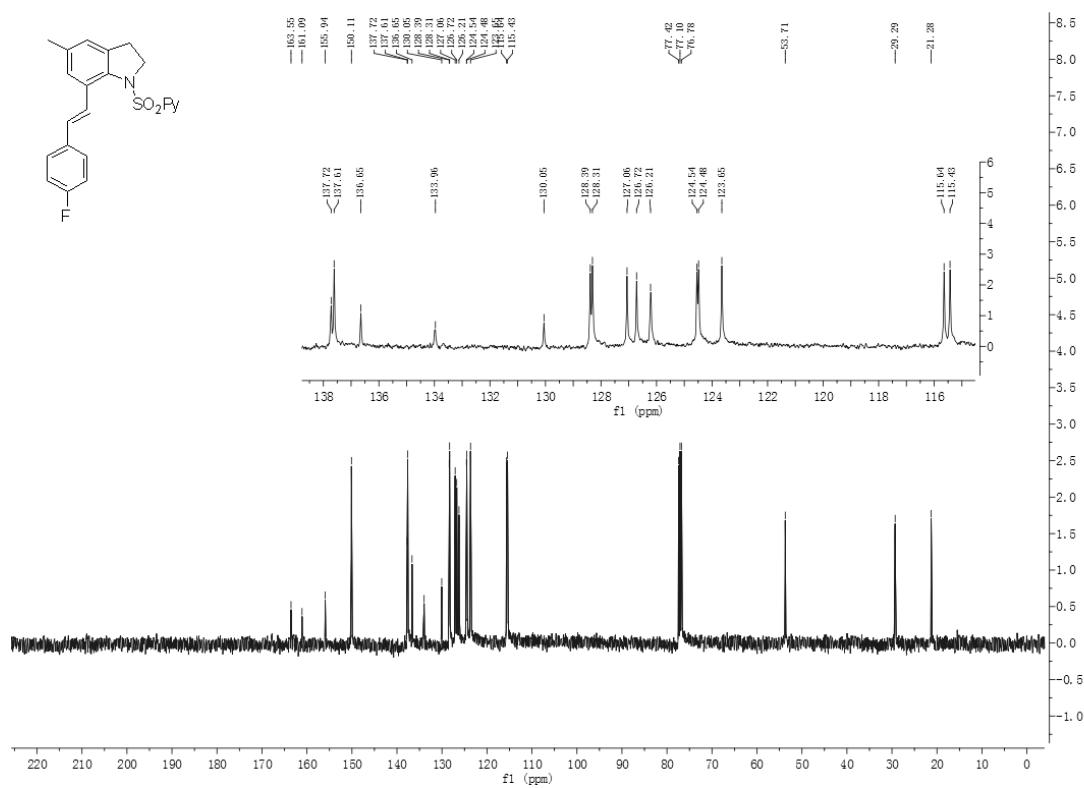

**(E)-Butyl 3-(5-methoxy-1-(pyridin-2-ylsulfonyl)indolin-7-yl)acrylate (3hb)**

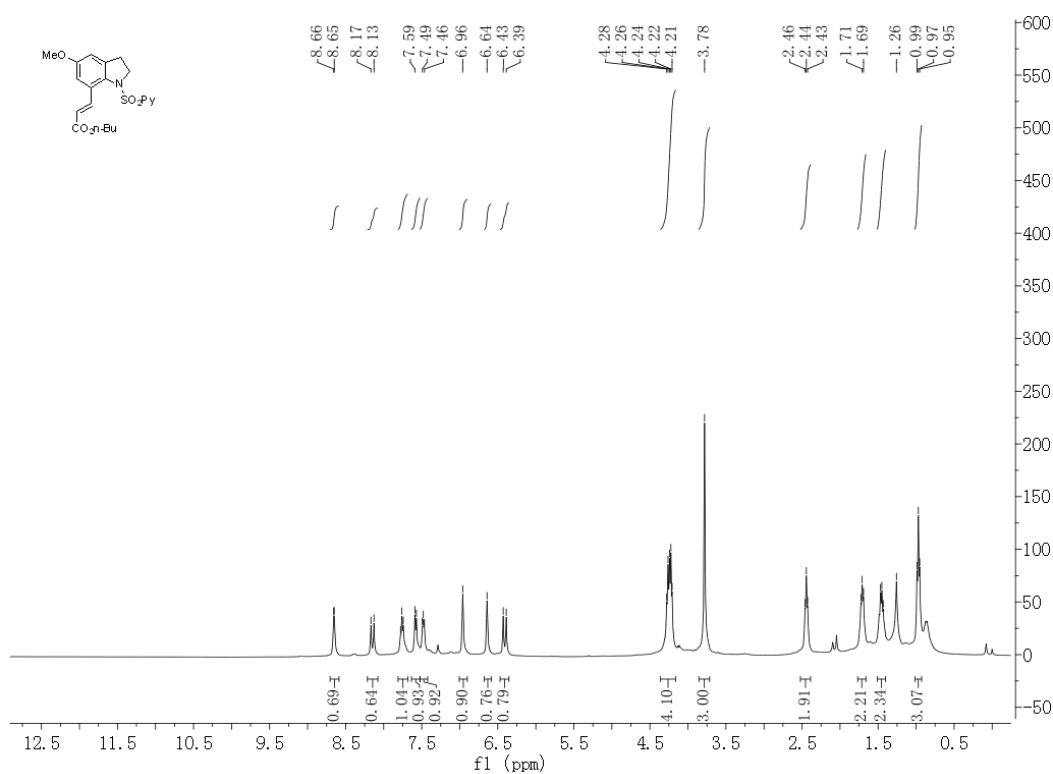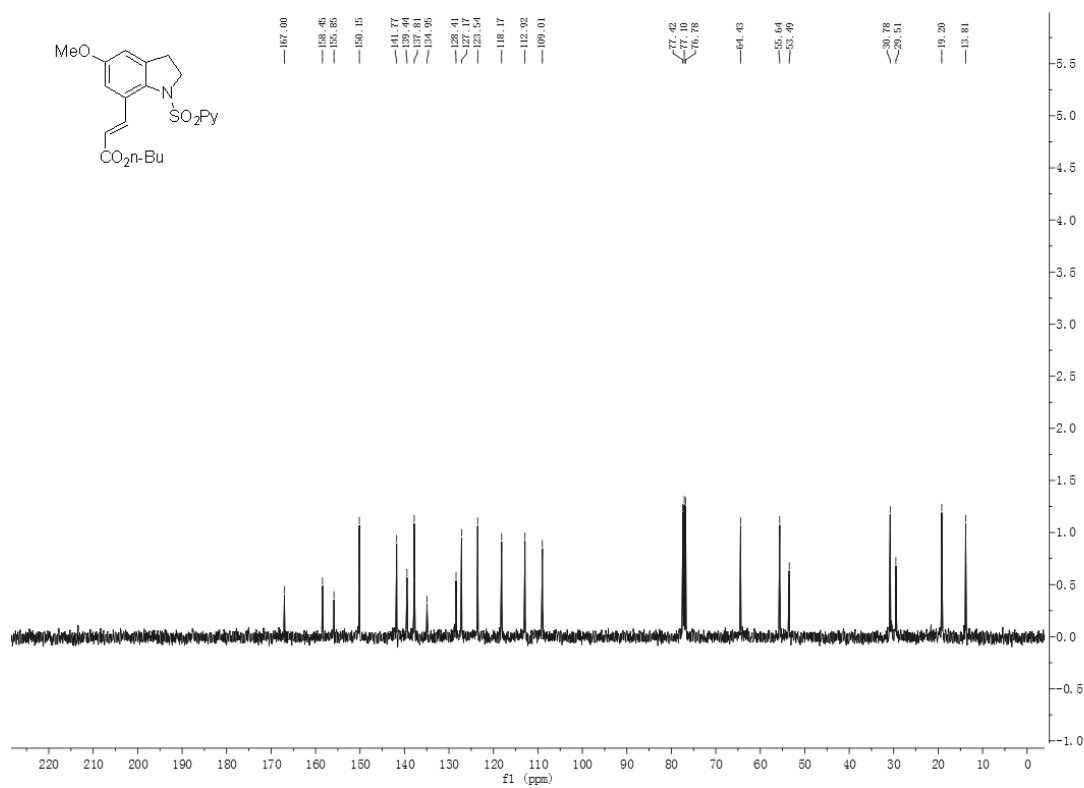

**(E)-7-(4-Fluorostyryl)-5-methoxy-1-(pyridin-2-ylsulfonyl) indoline (3hg)**

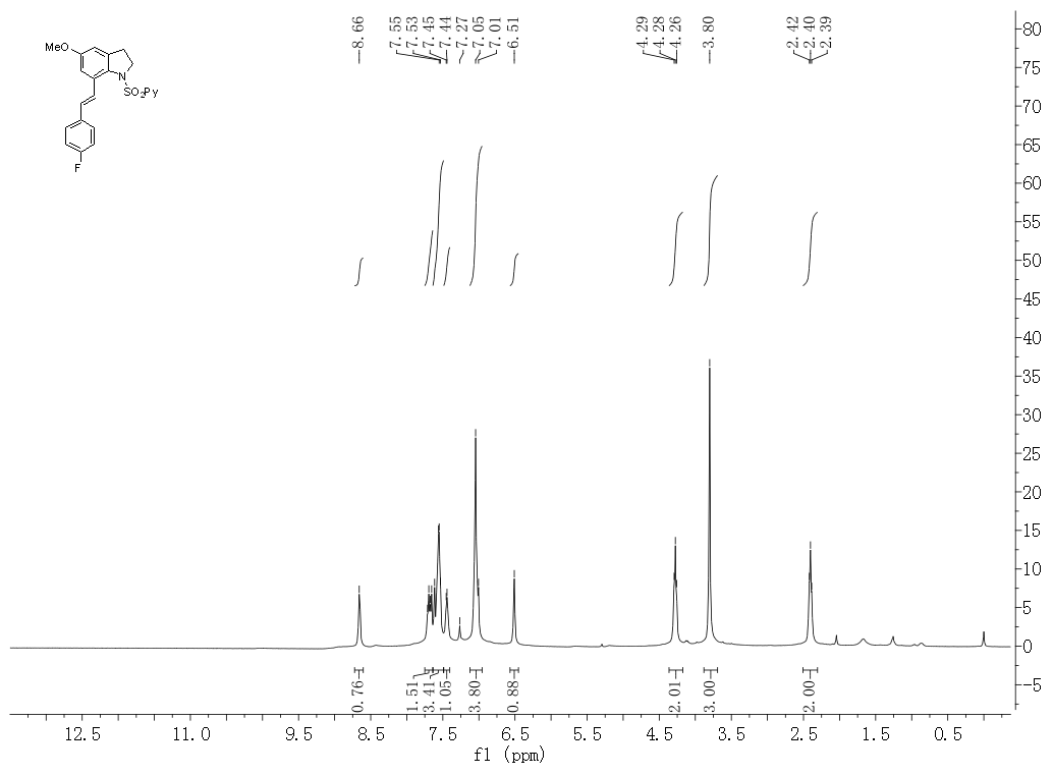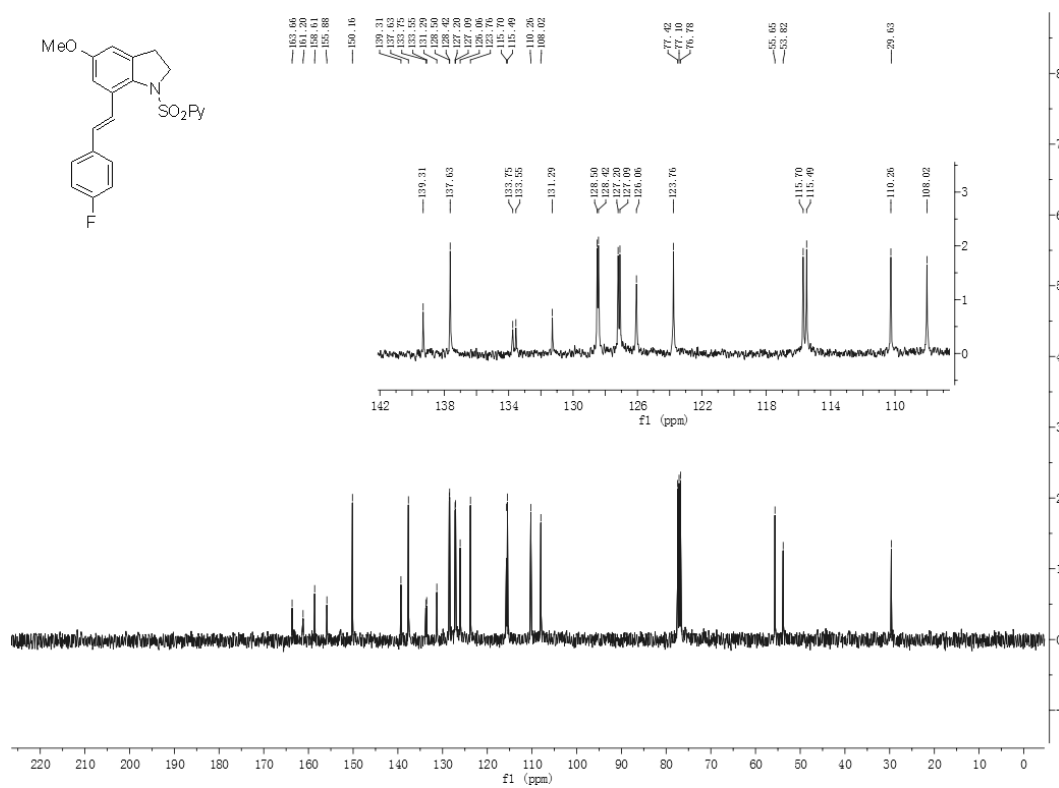

**(E)-Butyl 3-(5-chloro-1-(pyridin-2-ylsulfonyl)indolin-7-yl)acrylate (3ib)**

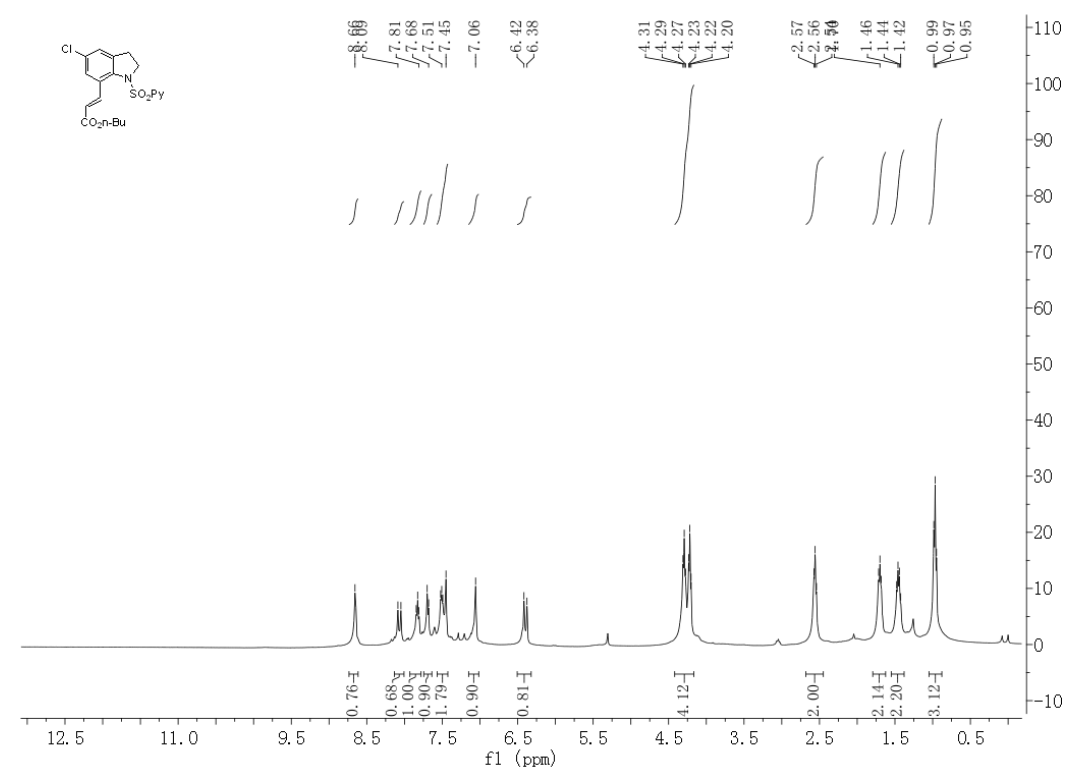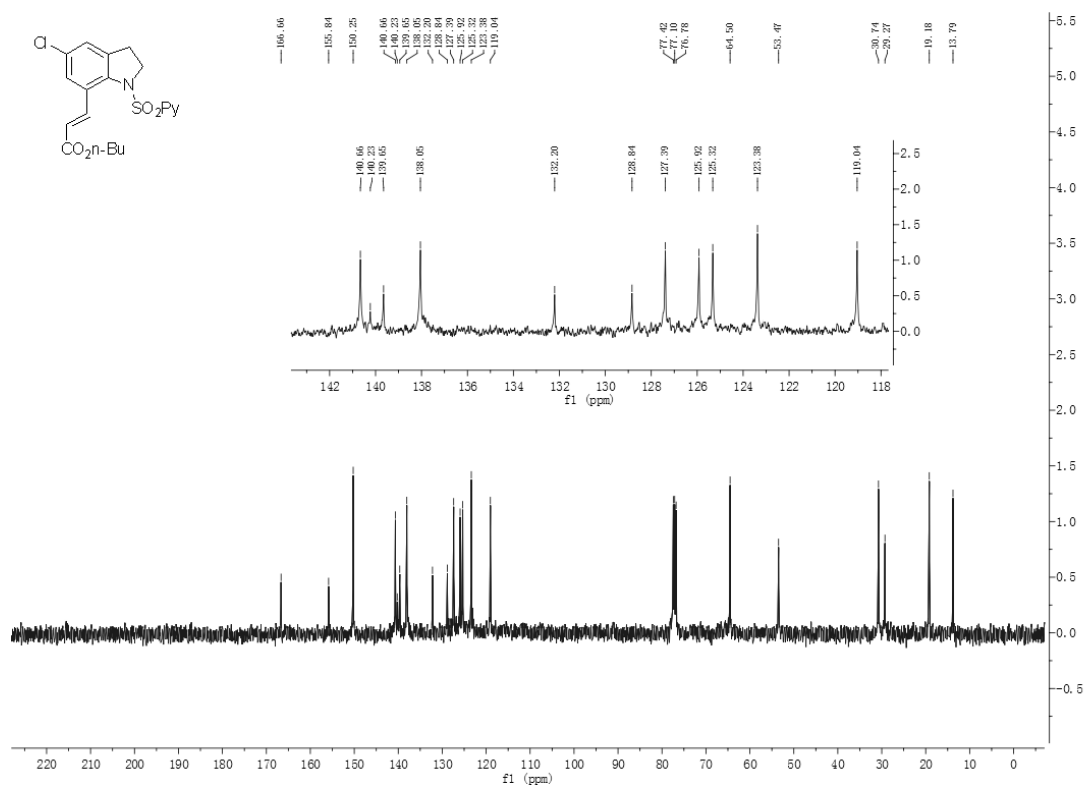

**(E)-5-Chloro-7-(4-fluorostyryl)-1-(pyridin-2-ylsulfonyl) indoline (3ig)**

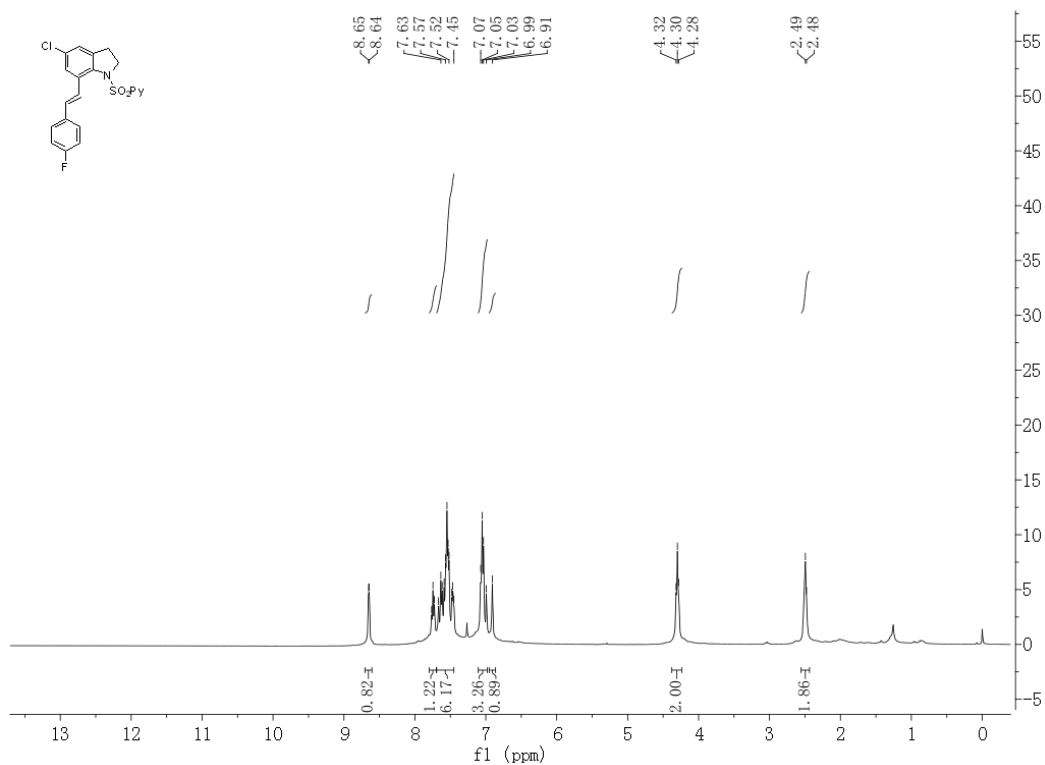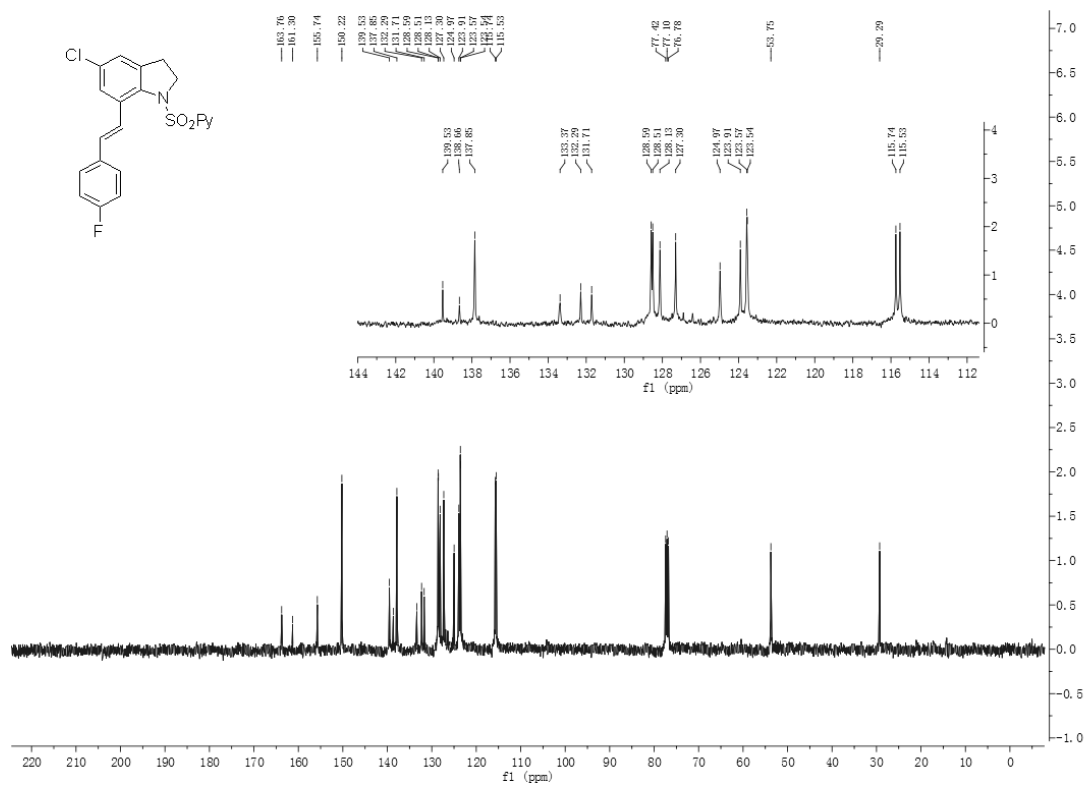

**(E)-Butyl 3-(5-bromo-1-(pyridin-2-ylsulfonyl)indolin-7-yl)acrylate (3jb)**

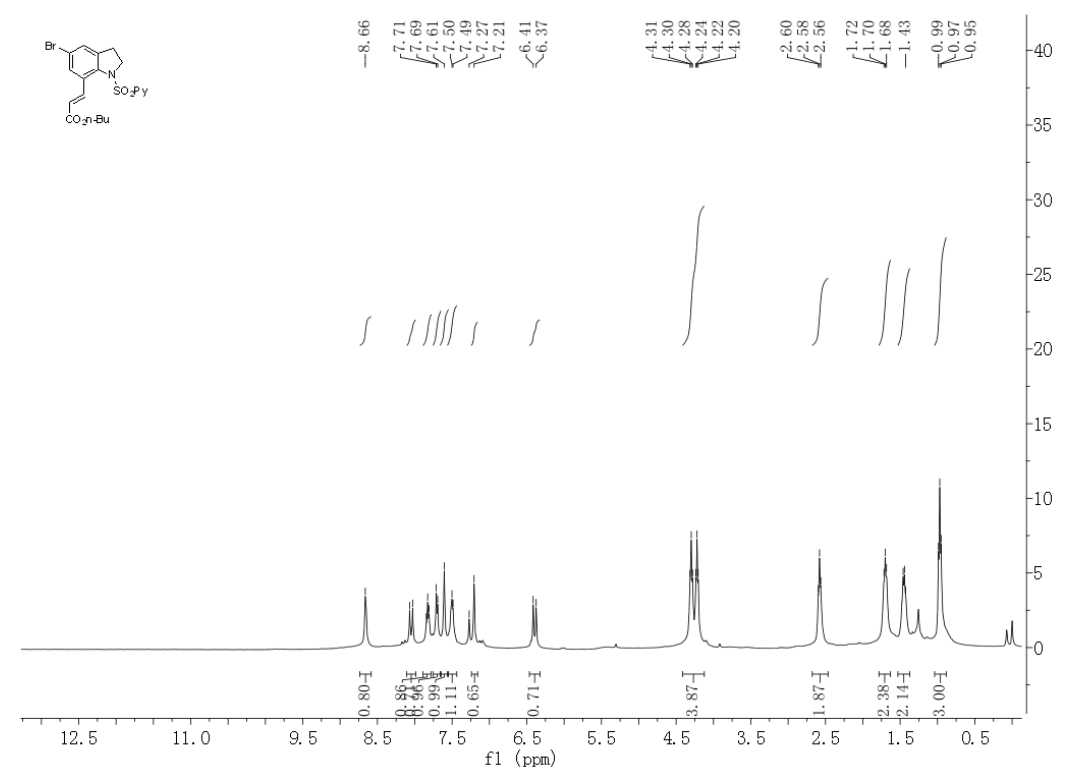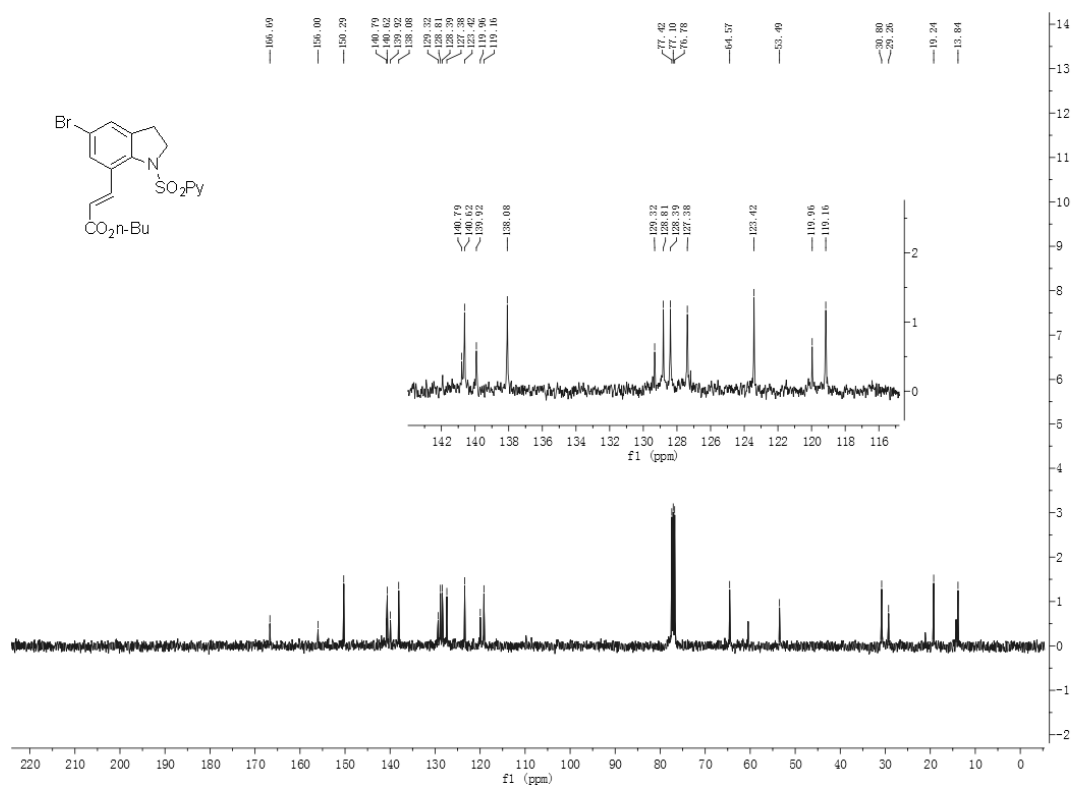



**(E)-5-Bromo-7-(4-fluorostyryl)-1-(pyridin-2-ylsulfonyl)indoline (3jg)**

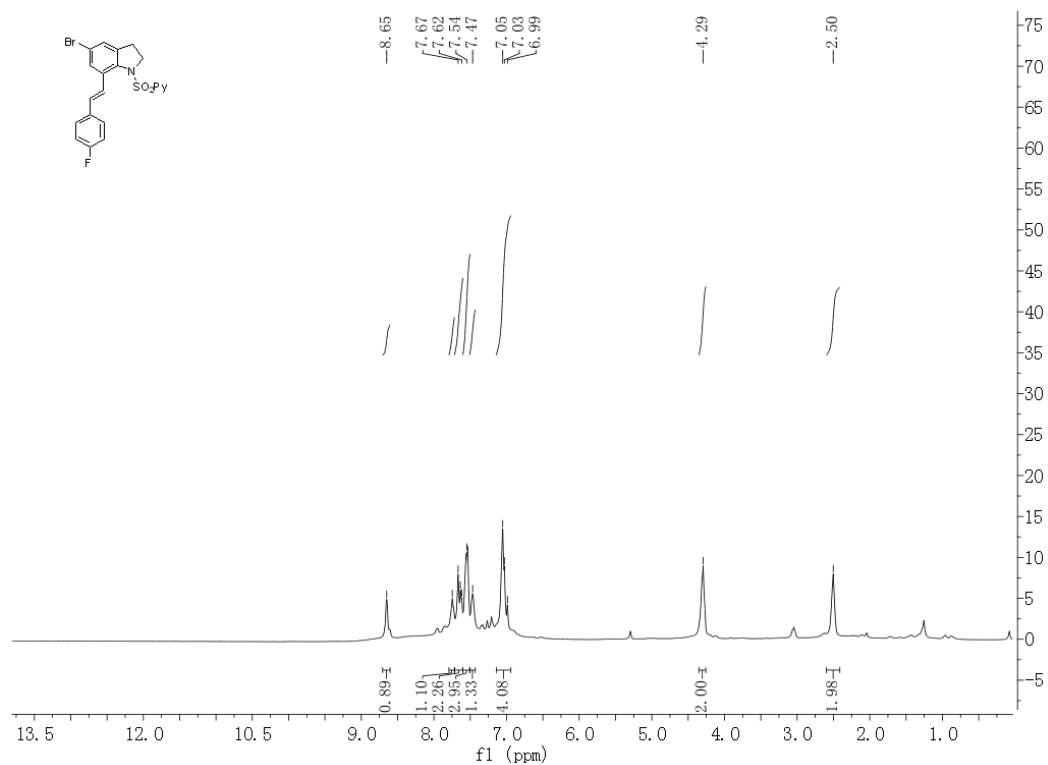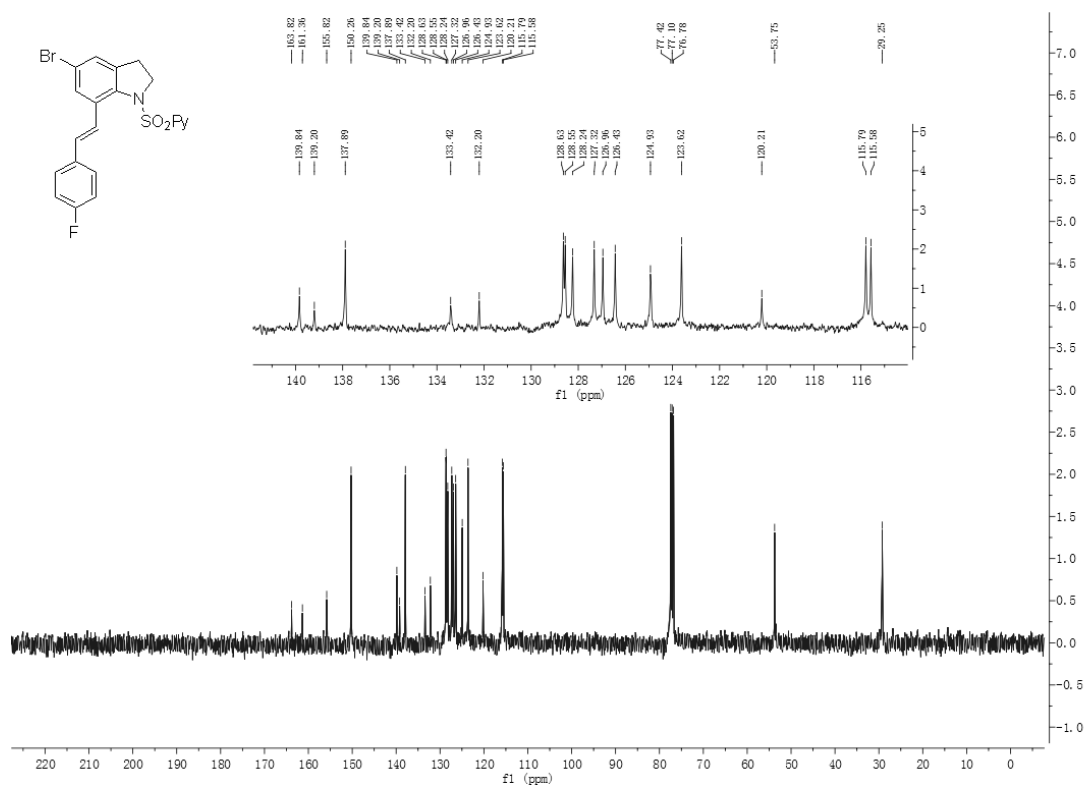

**(E)-Ethyl 3-(1-(pyridin-2-ylsulfonyl)-1H-indol-7-yl)acrylate (4da)**

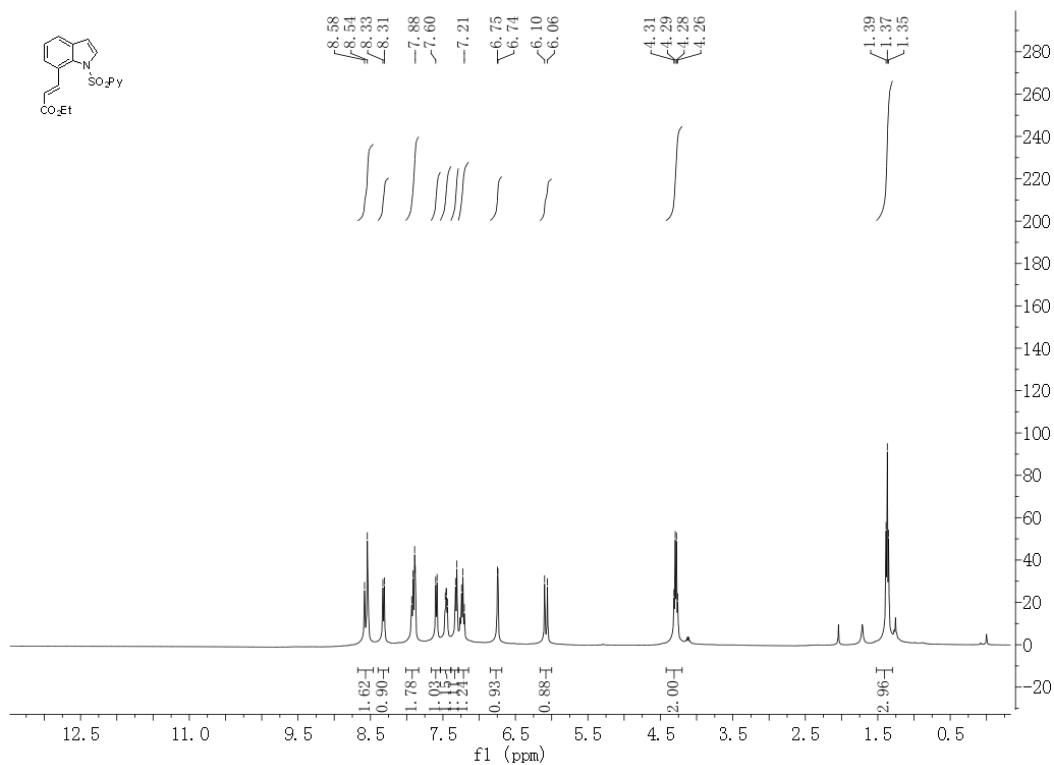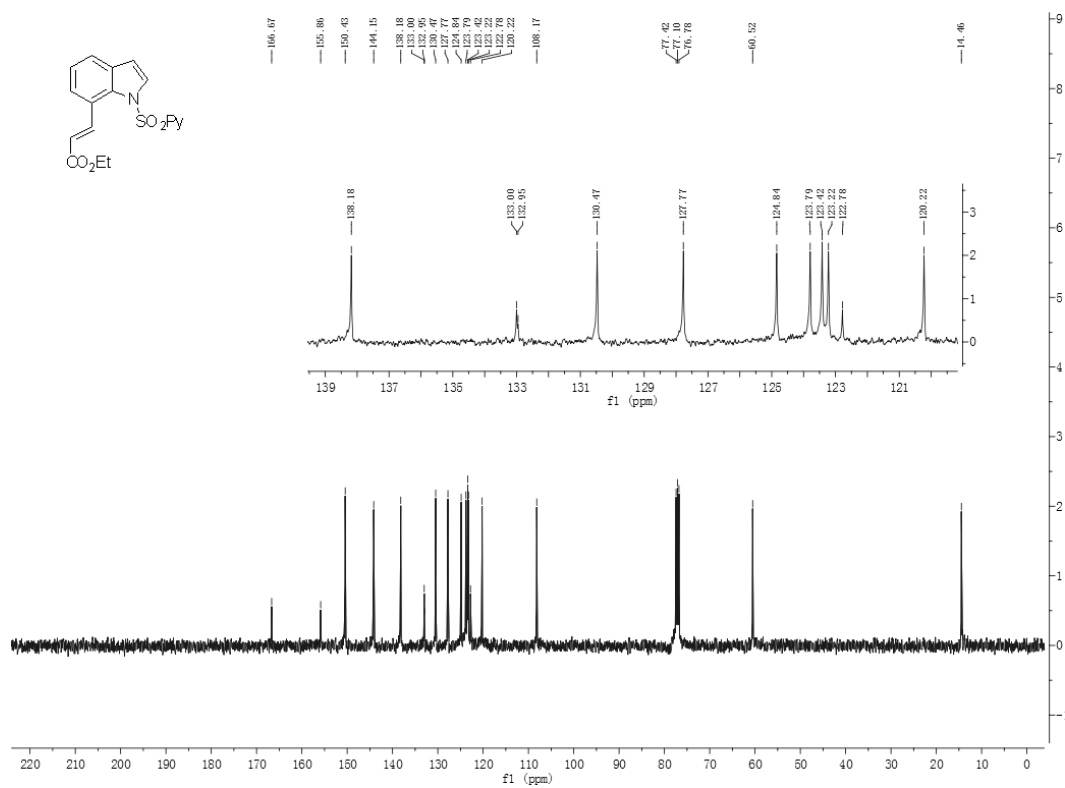

**(E)-1-(Pyridin-2-ylsulfonyl)-7-styryl-1H-indole (4df)**

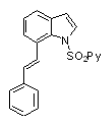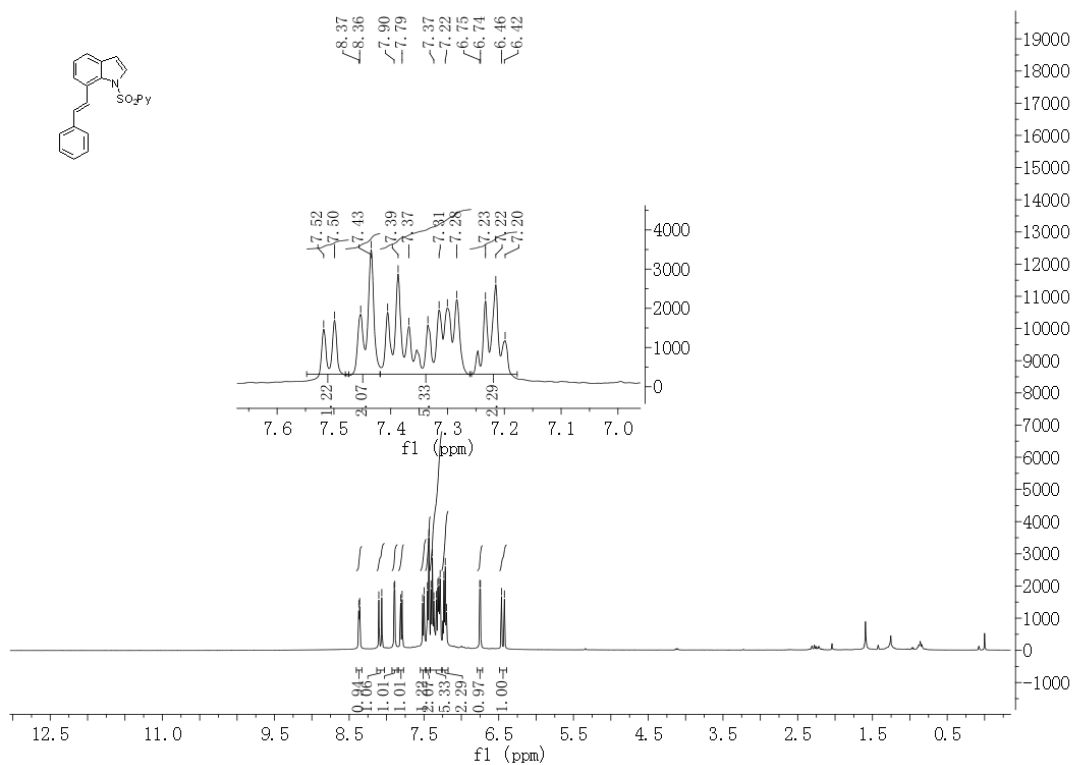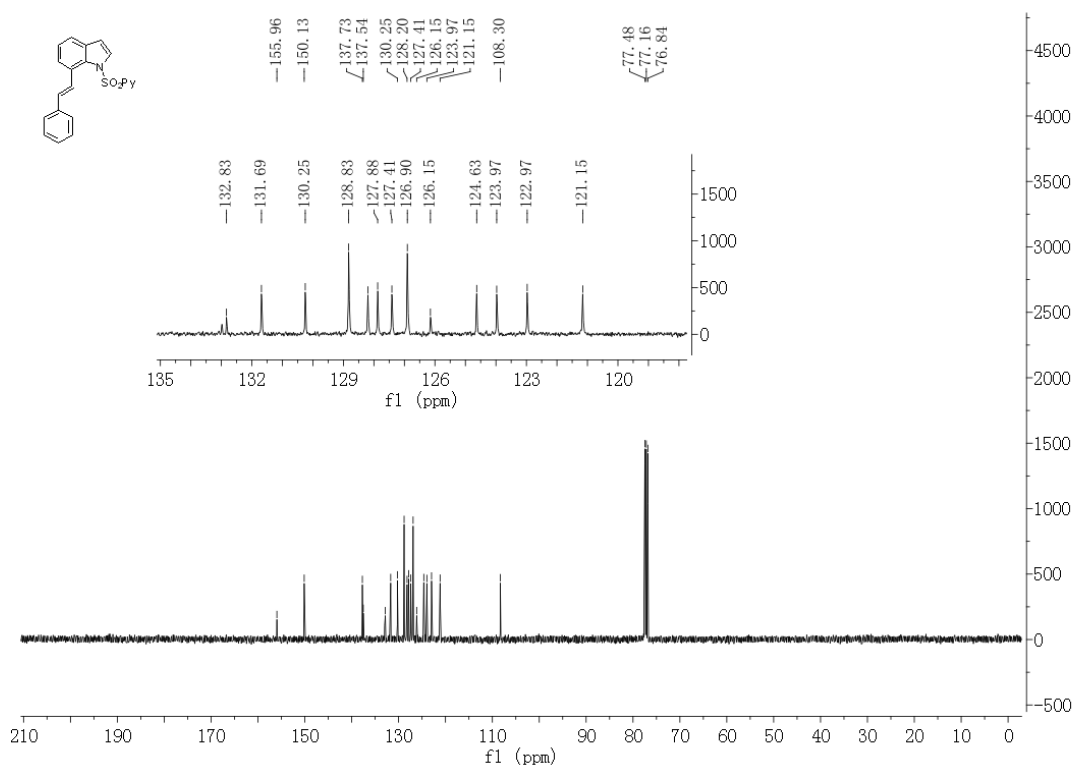

**(E)-Ethyl 3-(indolin-7-yl)acrylate (5da)**

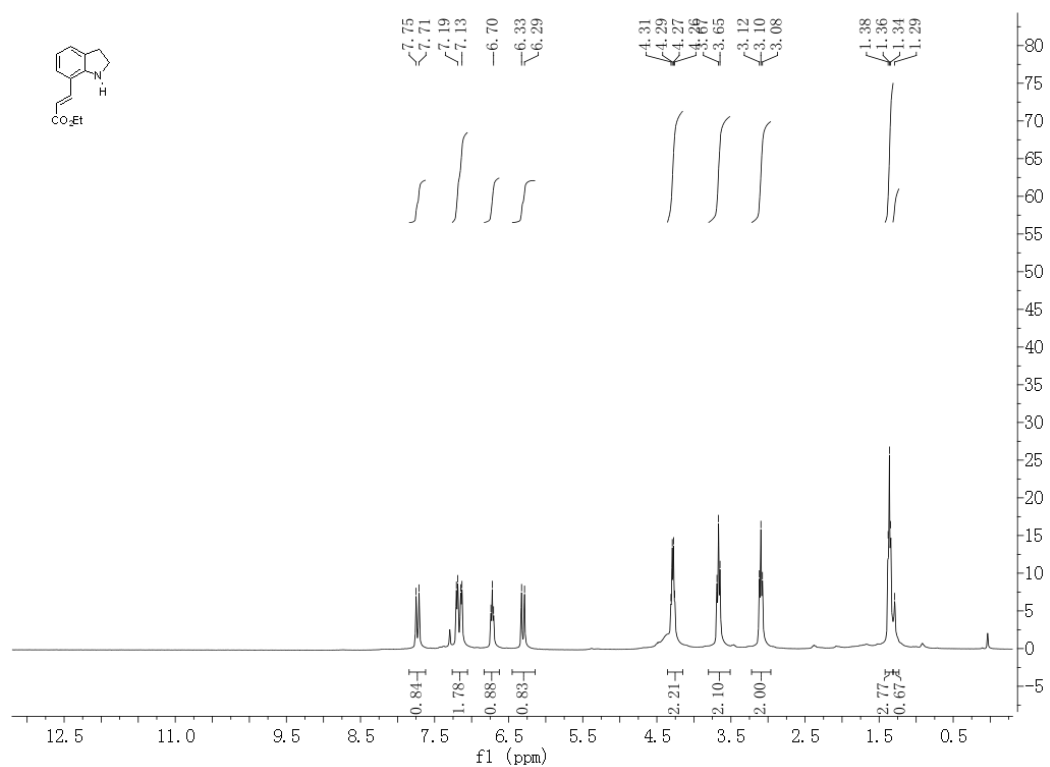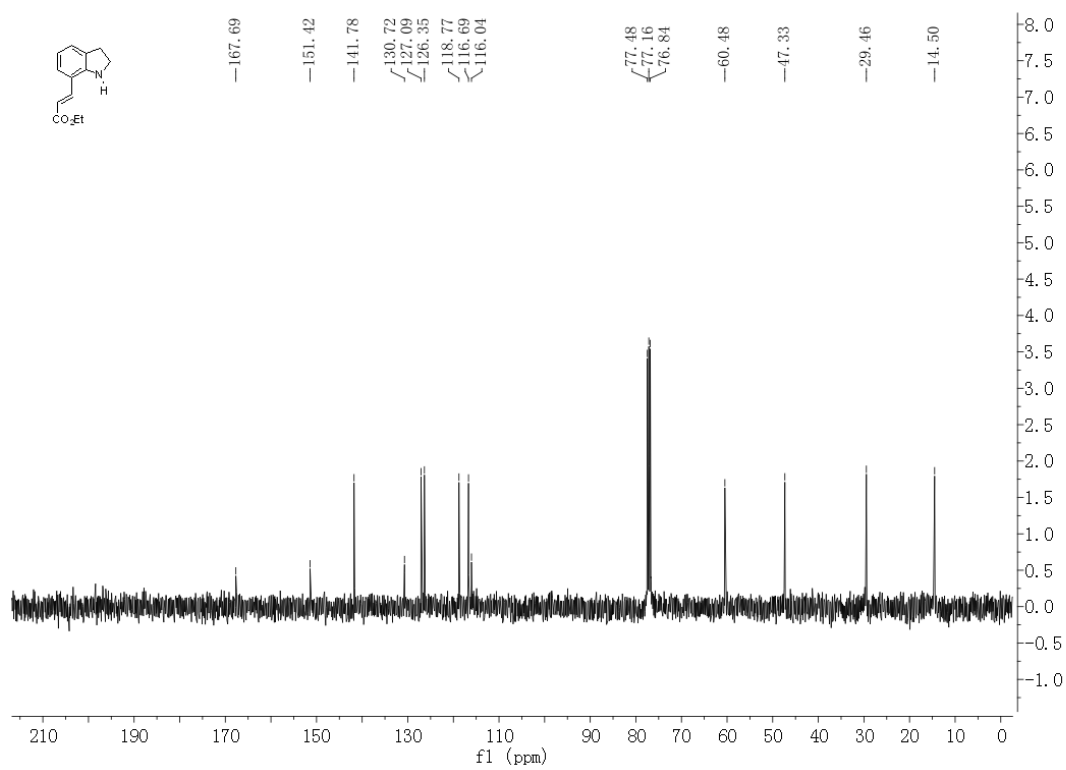

**(E)-7-Styrylindoline (5df)**

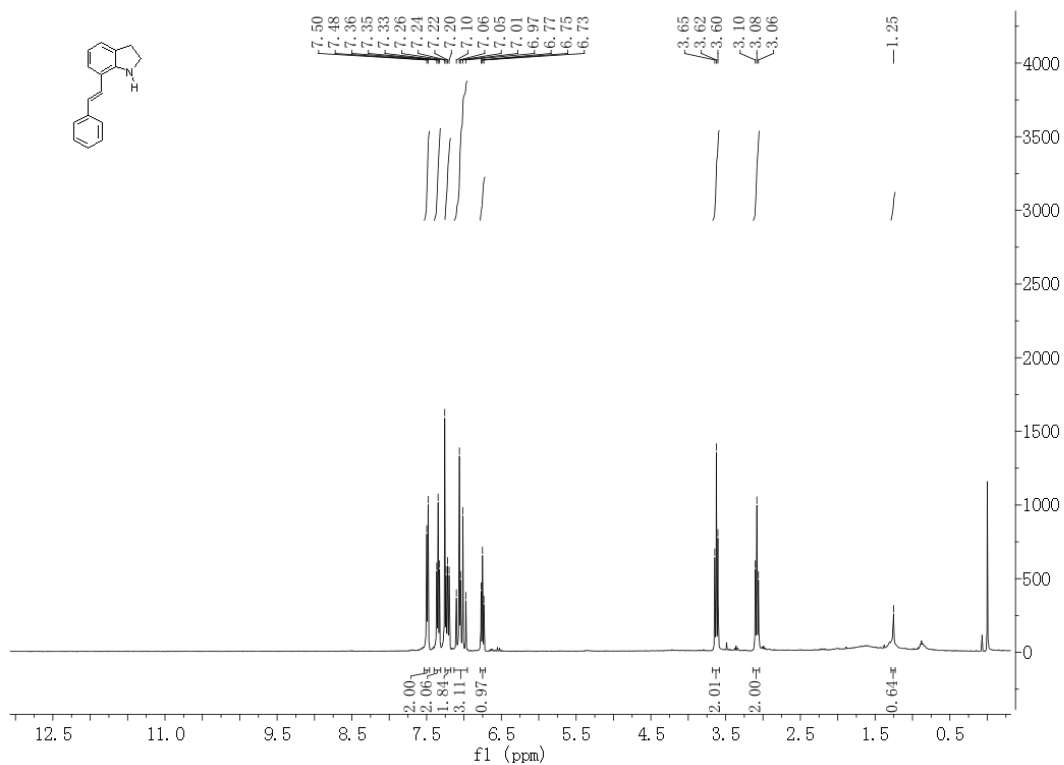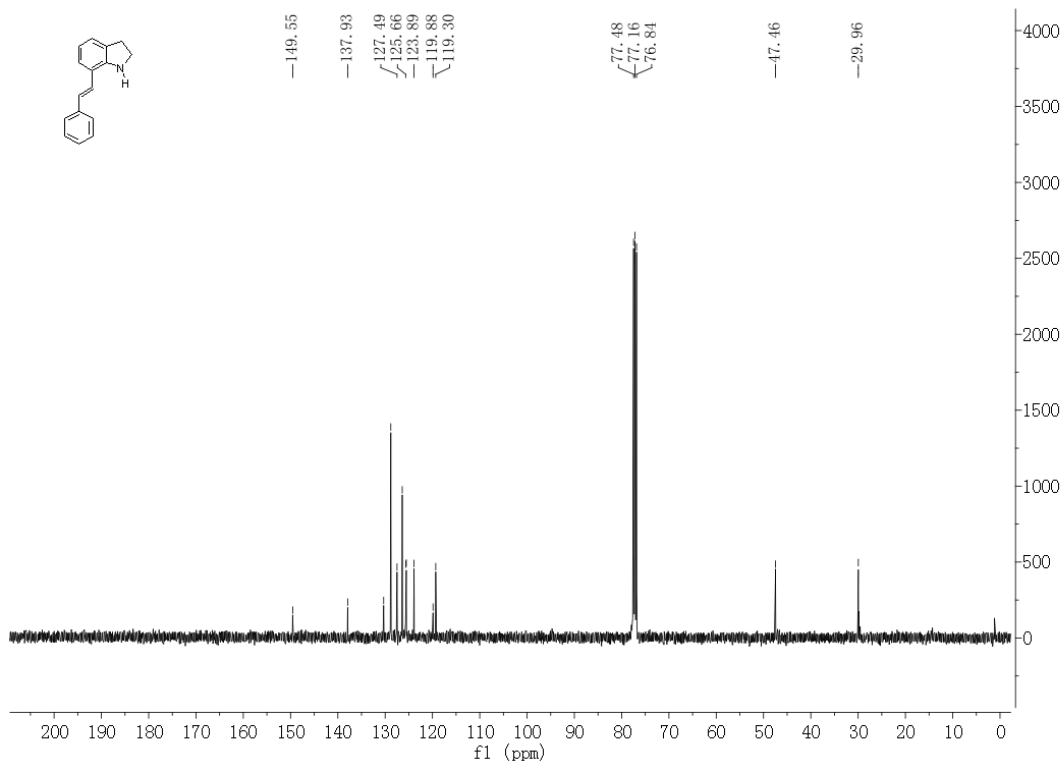

**(E)-Ethyl 3-(1H-indol-7-yl)acrylate (6da)**

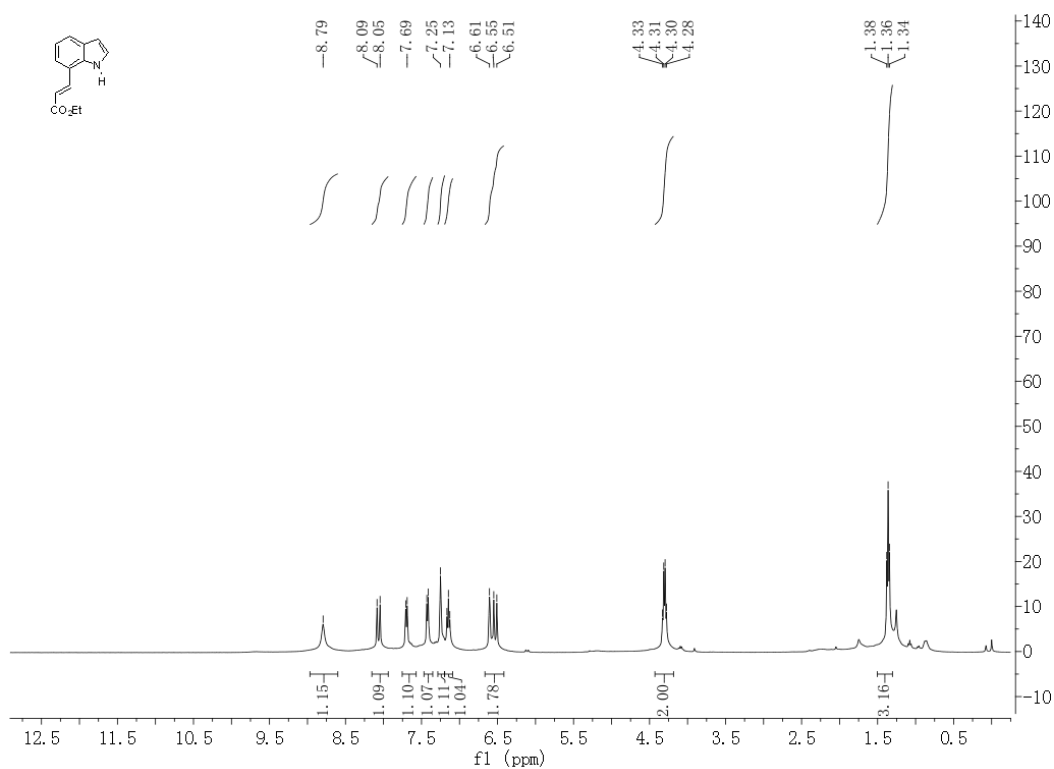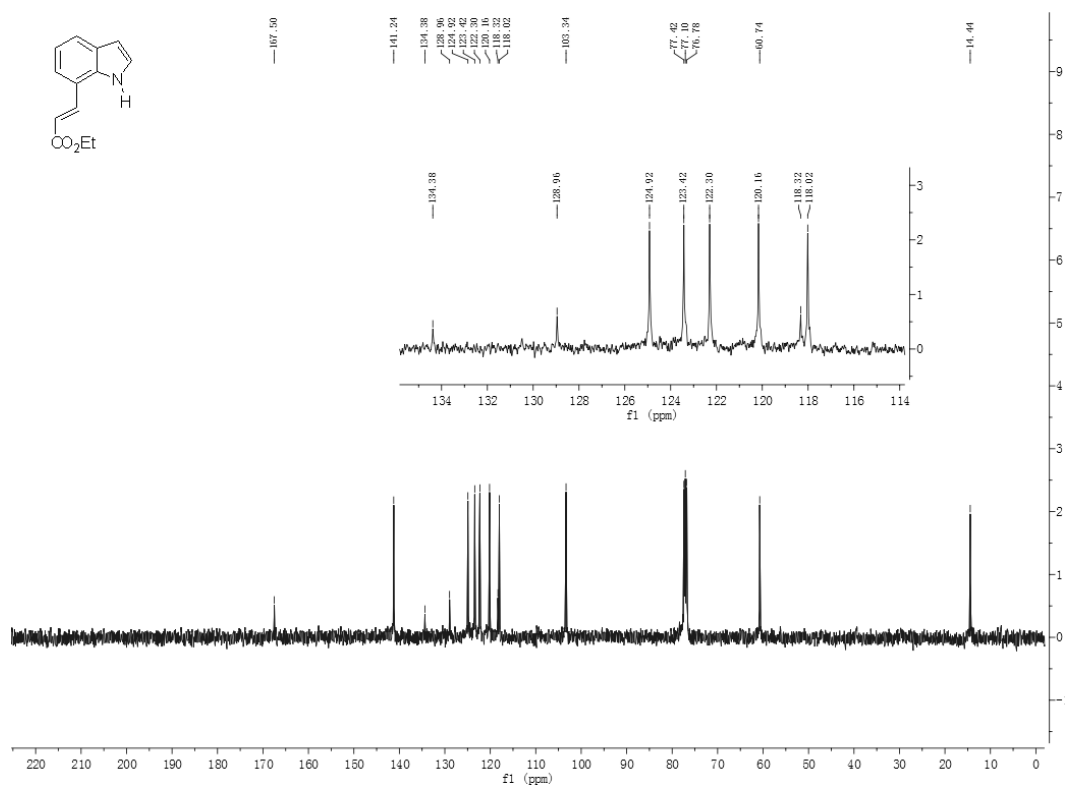

**(E)-7-Styryl-1H-indole (6df)**

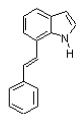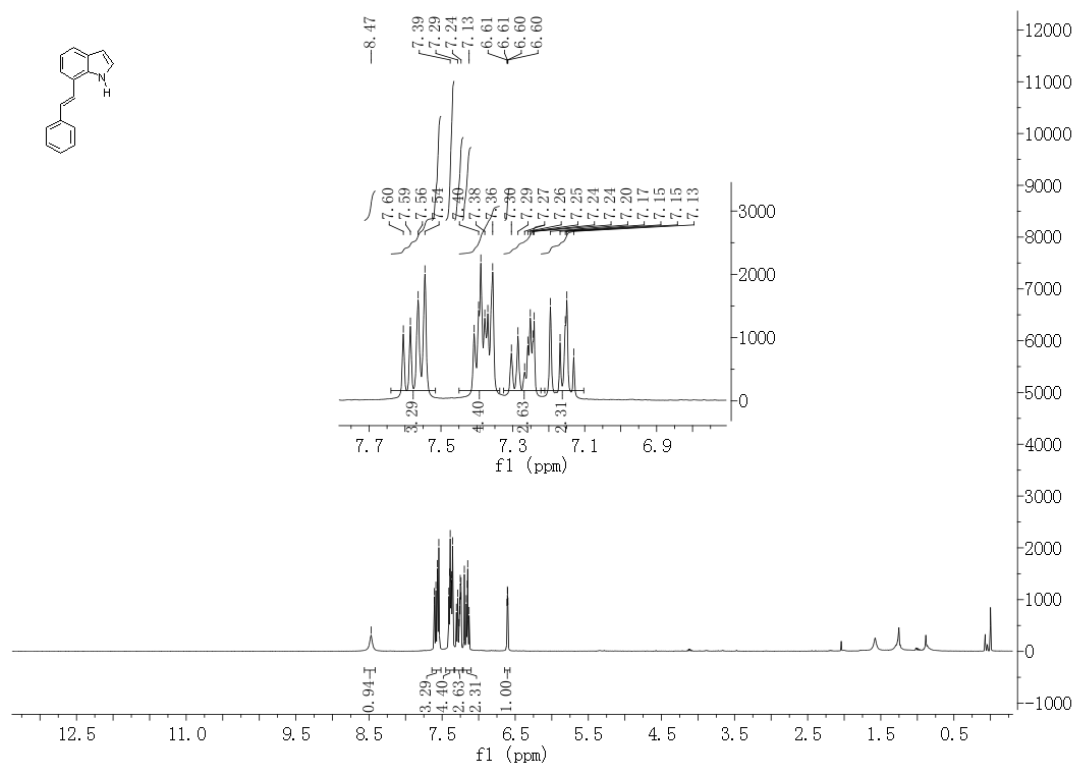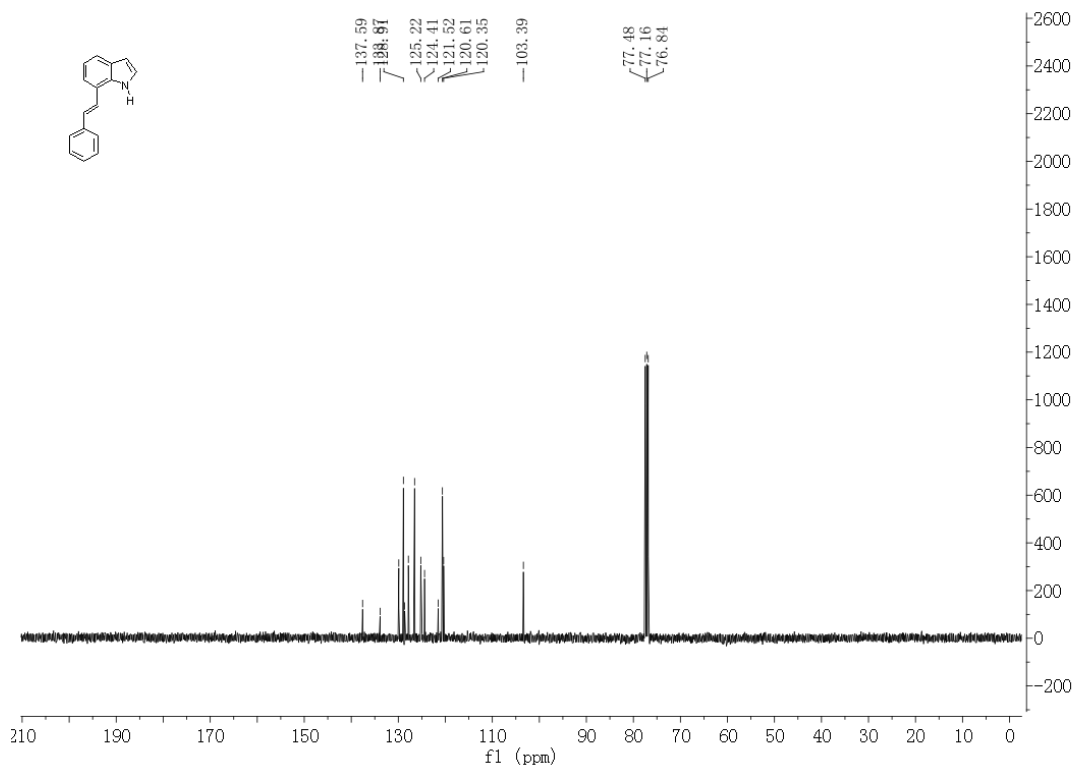

## 2: X-Ray structure of 3da and 3dk

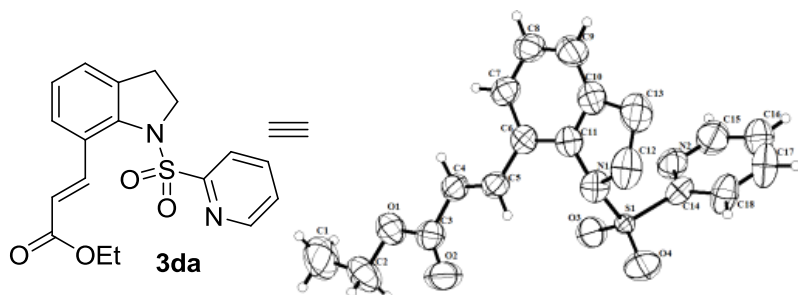

3da X-Ray

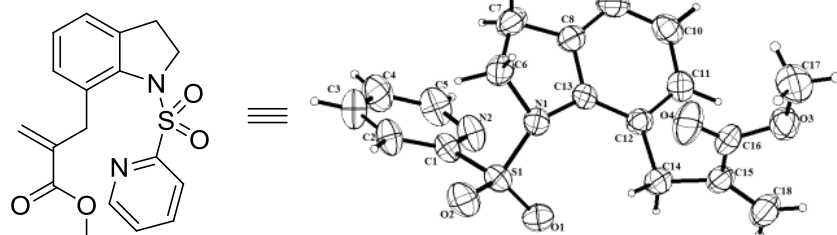

3dk X-Ray

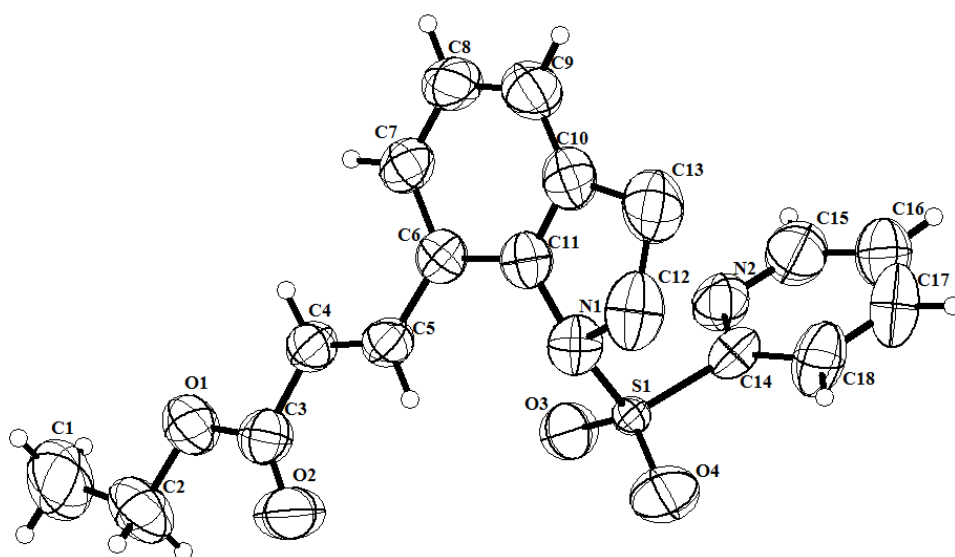

**Table 1.** Crystal data and structure refinement for 3da.

|                             |                                                                                                                         |
|-----------------------------|-------------------------------------------------------------------------------------------------------------------------|
| Identification code         | 3da                                                                                                                     |
| Empirical formula           | C <sub>18</sub> H <sub>18</sub> N <sub>2</sub> O <sub>4</sub> S                                                         |
| Formula weight              | 358.40                                                                                                                  |
| Temperature                 | 296(2) K                                                                                                                |
| Wavelength                  | 0.71073 Å                                                                                                               |
| Crystal system, space group | Monoclinic, P2(1)/n                                                                                                     |
| Unit cell dimensions        | a = 8.8040(16) Å    alpha = 90 deg.<br>b = 10.9952(19) Å    beta = 97.334(3) deg.<br>c = 18.299(3) Å    gamma = 90 deg. |
| Volume                      | 1756.8(5) Å <sup>3</sup>                                                                                                |



|                                   |                                             |
|-----------------------------------|---------------------------------------------|
| Z, Calculated density             | 4, 1.355 Mg/m <sup>3</sup>                  |
| Absorption coefficient            | 0.209 mm <sup>-1</sup>                      |
| F(000)                            | 752                                         |
| Crystal size                      | 0.36 x 0.30 x 0.23 mm                       |
| Theta range for data collection   | 2.17 to 25.10 deg.                          |
| Limiting indices                  | -10<=h<=10, -9<=k<=13, -21<=l<=21           |
| Reflections collected / unique    | 8577 / 3133 [R(int) = 0.0262]               |
| Completeness to theta = 25.10     | 99.9 %                                      |
| Absorption correction             | Semi-empirical from equivalent              |
| Max. and min. transmission        | 0.9532 and 0.9292                           |
| Refinement method                 | Full-matrix least-squares on F <sup>2</sup> |
| Data / restraints / parameters    | 3133 / 0 / 227                              |
| Goodness-of-fit on F <sup>2</sup> | 1.017                                       |
| Final R indices [I>2sigma(I)]     | R1 = 0.0389, wR2 = 0.0920                   |
| R indices (all data)              | R1 = 0.0590, wR2 = 0.1040                   |
| Largest diff. peak and hole       | 0.156 and -0.220 e.A <sup>-3</sup>          |

**Table 2.** Bond lengths [Å] and angles [deg] for **3da**.

---

|            |            |
|------------|------------|
| S(1)-O(3)  | 1.4245(14) |
| S(1)-O(4)  | 1.4295(14) |
| S(1)-N(1)  | 1.6557(18) |
| S(1)-C(14) | 1.785(2)   |
| N(1)-C(11) | 1.450(2)   |
| N(1)-C(12) | 1.510(3)   |
| N(2)-C(14) | 1.318(2)   |
| N(2)-C(15) | 1.338(3)   |
| O(1)-C(3)  | 1.342(2)   |
| O(1)-C(2)  | 1.447(3)   |
| O(2)-C(3)  | 1.201(2)   |
| C(1)-C(2)  | 1.480(4)   |
| C(1)-H(1A) | 0.9600     |
| C(1)-H(1B) | 0.9600     |
| C(1)-H(1C) | 0.9600     |
| C(2)-H(2A) | 0.9700     |
| C(2)-H(2B) | 0.9700     |
| C(3)-C(4)  | 1.458(3)   |
| C(4)-C(5)  | 1.310(3)   |
| C(4)-H(4)  | 0.9300     |
| C(5)-C(6)  | 1.466(3)   |
| C(5)-H(5)  | 0.9300     |
| C(6)-C(7)  | 1.399(3)   |
| C(6)-C(11) | 1.402(3)   |
| C(7)-C(8)  | 1.382(3)   |

|                  |            |
|------------------|------------|
| C(7)-H(7)        | 0.9300     |
| C(8)-C(9)        | 1.375(3)   |
| C(8)-H(8)        | 0.9300     |
| C(9)-C(10)       | 1.376(3)   |
| C(9)-H(9)        | 0.9300     |
| C(10)-C(11)      | 1.390(3)   |
| C(10)-C(13)      | 1.505(3)   |
| C(12)-C(13)      | 1.521(3)   |
| C(12)-H(12A)     | 0.9700     |
| C(12)-H(12B)     | 0.9700     |
| C(13)-H(13A)     | 0.9700     |
| C(13)-H(13B)     | 0.9700     |
| C(14)-C(18)      | 1.370(3)   |
| C(15)-C(16)      | 1.362(4)   |
| C(15)-H(15)      | 0.9300     |
| C(16)-C(17)      | 1.361(4)   |
| C(16)-H(16)      | 0.9300     |
| C(17)-C(18)      | 1.382(4)   |
| C(17)-H(17)      | 0.9300     |
| C(18)-H(18)      | 0.9300     |
| O(3)-S(1)-O(4)   | 120.21(10) |
| O(3)-S(1)-N(1)   | 107.54(9)  |
| O(4)-S(1)-N(1)   | 105.47(9)  |
| O(3)-S(1)-C(14)  | 108.50(9)  |
| O(4)-S(1)-C(14)  | 107.15(10) |
| N(1)-S(1)-C(14)  | 107.33(9)  |
| C(11)-N(1)-C(12) | 104.16(17) |
| C(11)-N(1)-S(1)  | 121.05(12) |
| C(12)-N(1)-S(1)  | 115.47(14) |
| C(14)-N(2)-C(15) | 116.0(2)   |
| C(3)-O(1)-C(2)   | 116.89(18) |
| C(2)-C(1)-H(1A)  | 109.5      |
| C(2)-C(1)-H(1B)  | 109.5      |
| H(1A)-C(1)-H(1B) | 109.5      |
| C(2)-C(1)-H(1C)  | 109.5      |
| H(1A)-C(1)-H(1C) | 109.5      |
| H(1B)-C(1)-H(1C) | 109.5      |
| O(1)-C(2)-C(1)   | 107.5(2)   |
| O(1)-C(2)-H(2A)  | 110.2      |
| C(1)-C(2)-H(2A)  | 110.2      |
| O(1)-C(2)-H(2B)  | 110.2      |
| C(1)-C(2)-H(2B)  | 110.2      |
| H(2A)-C(2)-H(2B) | 108.5      |

|                     |            |
|---------------------|------------|
| O(2)-C(3)-O(1)      | 123.1(2)   |
| O(2)-C(3)-C(4)      | 125.4(2)   |
| O(1)-C(3)-C(4)      | 111.52(18) |
| C(5)-C(4)-C(3)      | 121.66(19) |
| C(5)-C(4)-H(4)      | 119.2      |
| C(3)-C(4)-H(4)      | 119.2      |
| C(4)-C(5)-C(6)      | 126.94(18) |
| C(4)-C(5)-H(5)      | 116.5      |
| C(6)-C(5)-H(5)      | 116.5      |
| C(7)-C(6)-C(11)     | 116.03(18) |
| C(7)-C(6)-C(5)      | 121.29(18) |
| C(11)-C(6)-C(5)     | 122.58(18) |
| C(8)-C(7)-C(6)      | 121.9(2)   |
| C(8)-C(7)-H(7)      | 119.1      |
| C(6)-C(7)-H(7)      | 119.1      |
| C(9)-C(8)-C(7)      | 120.5(2)   |
| C(9)-C(8)-H(8)      | 119.8      |
| C(7)-C(8)-H(8)      | 119.8      |
| C(8)-C(9)-C(10)     | 119.5(2)   |
| C(8)-C(9)-H(9)      | 120.2      |
| C(10)-C(9)-H(9)     | 120.2      |
| C(9)-C(10)-C(11)    | 119.9(2)   |
| C(9)-C(10)-C(13)    | 130.7(2)   |
| C(11)-C(10)-C(13)   | 109.3(2)   |
| C(10)-C(11)-C(6)    | 121.92(19) |
| C(10)-C(11)-N(1)    | 111.06(18) |
| C(6)-C(11)-N(1)     | 126.65(18) |
| N(1)-C(12)-C(13)    | 105.34(18) |
| N(1)-C(12)-H(12A)   | 110.7      |
| C(13)-C(12)-H(12A)  | 110.7      |
| N(1)-C(12)-H(12B)   | 110.7      |
| C(13)-C(12)-H(12B)  | 110.7      |
| H(12A)-C(12)-H(12B) | 108.8      |
| C(10)-C(13)-C(12)   | 102.5(2)   |
| C(10)-C(13)-H(13A)  | 111.3      |
| C(12)-C(13)-H(13A)  | 111.3      |
| C(10)-C(13)-H(13B)  | 111.3      |
| C(12)-C(13)-H(13B)  | 111.3      |
| H(13A)-C(13)-H(13B) | 109.2      |
| N(2)-C(14)-C(18)    | 124.6(2)   |
| N(2)-C(14)-S(1)     | 114.97(15) |
| C(18)-C(14)-S(1)    | 120.43(17) |
| N(2)-C(15)-C(16)    | 124.2(2)   |
| N(2)-C(15)-H(15)    | 117.9      |

|                   |          |
|-------------------|----------|
| C(16)-C(15)-H(15) | 117.9    |
| C(17)-C(16)-C(15) | 118.3(3) |
| C(17)-C(16)-H(16) | 120.9    |
| C(15)-C(16)-H(16) | 120.9    |
| C(16)-C(17)-C(18) | 119.3(2) |
| C(16)-C(17)-H(17) | 120.4    |
| C(18)-C(17)-H(17) | 120.4    |
| C(14)-C(18)-C(17) | 117.6(2) |
| C(14)-C(18)-H(18) | 121.2    |
| C(17)-C(18)-H(18) | 121.2    |

Symmetry transformations used to generate equivalent atoms:

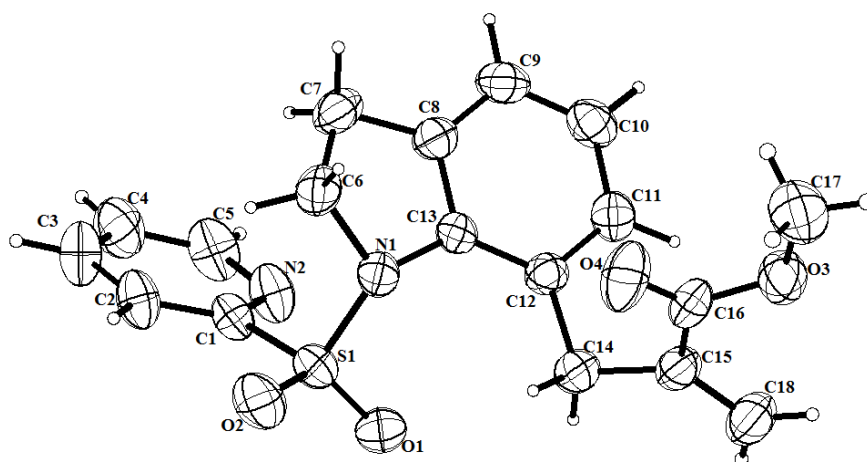

**Table 3.** Crystal data and structure refinement for 3dk.

|                                 |                                                                                                                |
|---------------------------------|----------------------------------------------------------------------------------------------------------------|
| Identification code             | xb7209_0m                                                                                                      |
| Empirical formula               | C <sub>18</sub> H <sub>18</sub> N <sub>2</sub> O <sub>4</sub> S                                                |
| Formula weight                  | 358.40                                                                                                         |
| Temperature                     | 296(2) K                                                                                                       |
| Wavelength                      | 0.71073 Å                                                                                                      |
| Crystal system, space group     | Orthorhombic, P2(1)2(1)2(1)                                                                                    |
| Unit cell dimensions            | a = 9.0332(18) Å    alpha = 90 deg.<br>b = 10.971(2) Å    beta = 90 deg.<br>c = 17.316(3) Å    gamma = 90 deg. |
| Volume                          | 1716.0(6) Å <sup>3</sup>                                                                                       |
| Z, Calculated density           | 4, 1.387 Mg/m <sup>3</sup>                                                                                     |
| Absorption coefficient          | 0.214 mm <sup>-1</sup>                                                                                         |
| F(000)                          | 752                                                                                                            |
| Crystal size                    | 0.37 x 0.31 x 0.25 mm                                                                                          |
| Theta range for data collection | 2.20 to 25.09 deg.                                                                                             |
| Limiting indices                | -8<=h<=10, -12<=k<=13, -20<=l<=13                                                                              |
| Reflections collected / unique  | 8397 / 3057 [R(int) = 0.0443]                                                                                  |
| Completeness to theta = 25.09   | 100.0 %                                                                                                        |
| Absorption correction           | Semi-empirical from equivalents                                                                                |

|                                   |                                             |
|-----------------------------------|---------------------------------------------|
| Max. and min. transmission        | 0.9478 and 0.9259                           |
| Refinement method                 | Full-matrix least-squares on F <sup>2</sup> |
| Data / restraints / parameters    | 3057 / 0 / 227                              |
| Goodness-of-fit on F <sup>2</sup> | 1.027                                       |
| Final R indices [I>2sigma(I)]     | R1 = 0.0310, wR2 = 0.0736                   |
| R indices (all data)              | R1 = 0.0343, wR2 = 0.0755                   |
| Absolute structure parameter      | 0.04(6)                                     |
| Largest diff. peak and hole       | 0.197 and -0.204 e.A <sup>-3</sup>          |

**Table 4.** Bond lengths [Å] and angles [deg] for 3dk.

---

|             |            |
|-------------|------------|
| S(1)-O(2)   | 1.4214(14) |
| S(1)-O(1)   | 1.4229(14) |
| S(1)-N(1)   | 1.6464(15) |
| S(1)-C(1)   | 1.7831(19) |
| N(1)-C(13)  | 1.448(2)   |
| N(1)-C(6)   | 1.495(2)   |
| N(2)-C(1)   | 1.321(2)   |
| N(2)-C(5)   | 1.336(3)   |
| O(3)-C(16)  | 1.335(2)   |
| O(3)-C(17)  | 1.437(3)   |
| O(4)-C(16)  | 1.195(2)   |
| C(1)-C(2)   | 1.376(3)   |
| C(2)-C(3)   | 1.381(3)   |
| C(2)-H(2)   | 0.9300     |
| C(3)-C(4)   | 1.363(3)   |
| C(3)-H(3)   | 0.9300     |
| C(4)-C(5)   | 1.369(3)   |
| C(4)-H(4)   | 0.9300     |
| C(5)-H(5)   | 0.9300     |
| C(6)-C(7)   | 1.530(3)   |
| C(6)-H(6A)  | 0.9700     |
| C(6)-H(6B)  | 0.9700     |
| C(7)-C(8)   | 1.496(3)   |
| C(7)-H(7A)  | 0.9700     |
| C(7)-H(7B)  | 0.9700     |
| C(8)-C(9)   | 1.385(3)   |
| C(8)-C(13)  | 1.388(2)   |
| C(9)-C(10)  | 1.379(3)   |
| C(9)-H(9)   | 0.9300     |
| C(10)-C(11) | 1.370(3)   |
| C(10)-H(10) | 0.9300     |
| C(11)-C(12) | 1.396(2)   |
| C(11)-H(11) | 0.9300     |
| C(12)-C(13) | 1.390(2)   |

|              |          |
|--------------|----------|
| C(12)-C(14)  | 1.512(2) |
| C(14)-C(15)  | 1.500(3) |
| C(14)-H(14A) | 0.9700   |
| C(14)-H(14B) | 0.9700   |
| C(15)-C(18)  | 1.320(3) |
| C(15)-C(16)  | 1.483(3) |
| C(17)-H(17A) | 0.9600   |
| C(17)-H(17B) | 0.9600   |
| C(17)-H(17C) | 0.9600   |
| C(18)-H(18A) | 0.9300   |
| C(18)-H(18B) | 0.9300   |

|                  |            |
|------------------|------------|
| O(2)-S(1)-O(1)   | 119.72(9)  |
| O(2)-S(1)-N(1)   | 106.33(9)  |
| O(1)-S(1)-N(1)   | 107.88(8)  |
| O(2)-S(1)-C(1)   | 106.57(9)  |
| O(1)-S(1)-C(1)   | 109.65(9)  |
| N(1)-S(1)-C(1)   | 105.86(8)  |
| C(13)-N(1)-C(6)  | 105.22(13) |
| C(13)-N(1)-S(1)  | 121.31(11) |
| C(6)-N(1)-S(1)   | 114.62(12) |
| C(1)-N(2)-C(5)   | 116.60(18) |
| C(16)-O(3)-C(17) | 116.10(17) |
| N(2)-C(1)-C(2)   | 124.56(18) |
| N(2)-C(1)-S(1)   | 114.58(14) |
| C(2)-C(1)-S(1)   | 120.70(15) |
| C(1)-C(2)-C(3)   | 117.2(2)   |
| C(1)-C(2)-H(2)   | 121.4      |
| C(3)-C(2)-H(2)   | 121.4      |
| C(4)-C(3)-C(2)   | 119.5(2)   |
| C(4)-C(3)-H(3)   | 120.2      |
| C(2)-C(3)-H(3)   | 120.2      |
| C(3)-C(4)-C(5)   | 118.7(2)   |
| C(3)-C(4)-H(4)   | 120.7      |
| C(5)-C(4)-H(4)   | 120.7      |
| N(2)-C(5)-C(4)   | 123.4(2)   |
| N(2)-C(5)-H(5)   | 118.3      |
| C(4)-C(5)-H(5)   | 118.3      |
| N(1)-C(6)-C(7)   | 105.15(15) |
| N(1)-C(6)-H(6A)  | 110.7      |
| C(7)-C(6)-H(6A)  | 110.7      |
| N(1)-C(6)-H(6B)  | 110.7      |
| C(7)-C(6)-H(6B)  | 110.7      |
| H(6A)-C(6)-H(6B) | 108.8      |

|                     |            |
|---------------------|------------|
| C(8)-C(7)-C(6)      | 102.09(15) |
| C(8)-C(7)-H(7A)     | 111.4      |
| C(6)-C(7)-H(7A)     | 111.4      |
| C(8)-C(7)-H(7B)     | 111.4      |
| C(6)-C(7)-H(7B)     | 111.4      |
| H(7A)-C(7)-H(7B)    | 109.2      |
| C(9)-C(8)-C(13)     | 119.67(17) |
| C(9)-C(8)-C(7)      | 130.03(17) |
| C(13)-C(8)-C(7)     | 110.18(16) |
| C(10)-C(9)-C(8)     | 118.57(17) |
| C(10)-C(9)-H(9)     | 120.7      |
| C(8)-C(9)-H(9)      | 120.7      |
| C(11)-C(10)-C(9)    | 121.02(18) |
| C(11)-C(10)-H(10)   | 119.5      |
| C(9)-C(10)-H(10)    | 119.5      |
| C(10)-C(11)-C(12)   | 122.25(18) |
| C(10)-C(11)-H(11)   | 118.9      |
| C(12)-C(11)-H(11)   | 118.9      |
| C(13)-C(12)-C(11)   | 115.73(16) |
| C(13)-C(12)-C(14)   | 123.89(15) |
| C(11)-C(12)-C(14)   | 120.10(16) |
| C(8)-C(13)-C(12)    | 122.68(16) |
| C(8)-C(13)-N(1)     | 110.10(15) |
| C(12)-C(13)-N(1)    | 126.76(15) |
| C(15)-C(14)-C(12)   | 111.43(15) |
| C(15)-C(14)-H(14A)  | 109.3      |
| C(12)-C(14)-H(14A)  | 109.3      |
| C(15)-C(14)-H(14B)  | 109.3      |
| C(12)-C(14)-H(14B)  | 109.3      |
| H(14A)-C(14)-H(14B) | 108.0      |
| C(18)-C(15)-C(16)   | 121.64(18) |
| C(18)-C(15)-C(14)   | 124.19(19) |
| C(16)-C(15)-C(14)   | 114.16(16) |
| O(4)-C(16)-O(3)     | 122.8(2)   |
| O(4)-C(16)-C(15)    | 123.58(18) |
| O(3)-C(16)-C(15)    | 113.61(16) |
| O(3)-C(17)-H(17A)   | 109.5      |
| O(3)-C(17)-H(17B)   | 109.5      |
| H(17A)-C(17)-H(17B) | 109.5      |
| O(3)-C(17)-H(17C)   | 109.5      |
| H(17A)-C(17)-H(17C) | 109.5      |
| H(17B)-C(17)-H(17C) | 109.5      |
| C(15)-C(18)-H(18A)  | 120.0      |
| C(15)-C(18)-H(18B)  | 120.0      |

H(18A)-C(18)-H(18B)

120.0

---

Symmetry transformations used to generate equivalent atoms:
